# Supplementary material for: Barriers to smoking cessation: a qualitative study from the perspective of primary care in Malaysia
Source: PubMed Central journal article supplement — BMJ Open. 2019 Jul 9;9(7):e025491. doi: 10.1136/bmjopen-2018-025491 (PMC6629417; doi:10.1136/bmjopen-2018-025491), 2019-07-09
Supplement: bmjopen-2018-025491.draft_revisions.pdf [file bmjopen-2018-025491.draft_revisions.pdf]

# BMJ Open

BMJ Open is committed to open peer review. As part of this commitment we make the peer review history of every article we publish publicly available.

When an article is published we post the peer reviewers' comments and the authors' responses online. We also post the versions of the paper that were used during peer review. These are the versions that the peer review comments apply to.

The versions of the paper that follow are the versions that were submitted during the peer review process. They are not the versions of record or the final published versions. They should not be cited or distributed as the published version of this manuscript.

BMJ Open is an open access journal and the full, final, typeset and author-corrected version of record of the manuscript is available on our site with no access controls, subscription charges or pay-per-view fees (<http://bmjopen.bmj.com>).

If you have any questions on BMJ Open's open peer review process please email [info.bmjopen@bmj.com](mailto:info.bmjopen@bmj.com)

# BMJ Open

## Barriers to Smoking Cessation– A Grounded Theory Study from Primary Care Perspective

|                               |                                                                                                                                                                                                                                                                                                                                                                                                                                  |
|-------------------------------|----------------------------------------------------------------------------------------------------------------------------------------------------------------------------------------------------------------------------------------------------------------------------------------------------------------------------------------------------------------------------------------------------------------------------------|
| Journal:                      | <i>BMJ Open</i>                                                                                                                                                                                                                                                                                                                                                                                                                  |
| Manuscript ID                 | bmjopen-2018-025491                                                                                                                                                                                                                                                                                                                                                                                                              |
| Article Type:                 | Research                                                                                                                                                                                                                                                                                                                                                                                                                         |
| Date Submitted by the Author: | 17-Jul-2018                                                                                                                                                                                                                                                                                                                                                                                                                      |
| Complete List of Authors:     | Chean, Kooi-Yau; Penang Medical College, Family Medicine<br>Goh, Lee Gan; National University Health System, Family Medicine<br>Liew, Kah-Weng; Penang Medical College, Family Medicine<br>Tan, Chia-Chia; Penang Medical College, Family Medicine<br>Choi, Xin-Ling; Penang Medical College, Family Medicine<br>Tan, Kean-Chye; Penang Medical College, Family Medicine<br>Ooi, Siew-Ting; University of Dublin Trinity College |
| Keywords:                     | barriers, smoking cessation, grounded theory study, qualitative study,<br>PRIMARY CARE, Malaysia                                                                                                                                                                                                                                                                                                                                 |
|                               |                                                                                                                                                                                                                                                                                                                                                                                                                                  |

SCHOLARONE™  
Manuscripts

View Only

1  
2  
3 **Barriers to Smoking Cessation– A Grounded Theory Study from Primary Care**  
4 **Perspective.**  
5  
6  
7

8 **Authors:**  
9

10 CHEAN, Kooi-Yau<sup>1\*</sup>

11 GOH, Lee-Gan<sup>2</sup>

12 LIEW, Kah-Weng<sup>1</sup>

13 TAN, Chia-Chia<sup>1</sup>

14 CHOI, Xin-Ling<sup>1</sup>

15 TAN, Kean-Chye<sup>1</sup>

16 OOI, Siew-Ting<sup>3</sup>  
17  
18  
19  
20  
21

22 **Authors' affiliation(s):**  
23

24 <sup>1</sup>*Department of Family Medicine, Penang Medical College. Penang. 4, Jalan Sepoy Lines.*  
25 *10450 Penang. Malaysia.*

26 <sup>2</sup>*Department of Family Medicine, National University Health System, Singapore. Level 9. Tower Block, 1E,*  
27 *Kent Ridge Road. Singapore*  
28

29 <sup>3</sup>*Trinity College Dublin. School of Medicine. Dublin 2, Ireland.*  
30  
31  
32  
33

34 **Corresponding Author:**  
35

36 Kooi-Yau CHEAN FRNZCGP

37 Department of Family Medicine,

38 Penang Medical College.

39 4, Jalan Sepoy Lines. 10450 Penang. Malaysia.

40 E mail: [kychean@rcsiucd.edu.my](mailto:kychean@rcsiucd.edu.my)

41 Tel: +6042171923, +6042171999  
42  
43  
44

45 Word count: 3781  
46

47 **Keywords:** smoking cessation, qualitative study, Malaysia, barriers, grounded theory,  
48 primary care  
49  
50  
51  
52  
53  
54  
55  
56  
57  
58  
59  
60

## ABSTRACT

### Objectives

This study aims to explore and to describe a model of barriers to smoking cessation from primary care perspective.

**Design** We conducted individual in-depth interviews in a semi-structured format, which was audiotaped, then verbatim transcribed and translated when necessary. Using Straussian grounded theory method, data was first independently coded and then collectively discussed for emergent themes.

**Participants and Setting** We recruited 57 participants by purposive sampling from the respondents of our previous smoking related study. Current smokers who had at least one failed quit attempts were included in the study.

**Results** A model of five themes emerged. Participants were unable to resist temptation cues in their personal life and lifestyle. Nicotine addiction was a problem for some. Misconception of ability to quit smoking was just like as a matter of mind-control. Participants also had serious wrong beliefs that smoking could be therapeutic and stop smoking could instead cause serious health complications. Following cultural norms of accepting cigarettes offered by friends was perceived as a token of friendship was a problem. Finally, smoking cessation services were not user friendly.

**Conclusions** Specific beliefs and practices prevented smokers from quitting. Clinicians need to work on the identified factors to help patients overcome barriers to smoking cessation.

**Word count: 203**

## ARTICLE SUMMARY

### Strengths and limitations of this study

- As a grounded theory study from the perspective of primary care, this paper will contribute to the currently limited literature generated on the basis of patients' experiences in their quit attempts.
- A diversity of participants from different races and from both high and low nicotine dependence were recruited.
- The use of in-depth qualitative methods allowed detailed account of smokers' experience in smoking cessation.
- No focus group interview was done in this study and hence the opportunity to observe the interaction among the participants was lost.

## INTRODUCTION

Cigarette smoking harms almost every organ of the body resulting in premature death in half of the smokers<sup>1</sup> and yet there are over one billion smokers in the world.<sup>2</sup> Quit smoking can save lives. Quit interest is high as evident by nearly 7 out of every 10 (68%<sup>3</sup>) smokers want to quit completely but most quit attempts are unsuccessful (7.4%<sup>3</sup> success rate) despite many theories or treatment methods. The estimated number of attempts before quitting successfully ranged from 6.1 to 142.<sup>4</sup> The abstinence rate at 6 months is only 3%-5% in those self-quit<sup>5</sup> and 19%-33% in those who opt for pharmacotherapy.<sup>6</sup> We must therefore look hard from all perspectives to understand reasons contributing to failures in smoking cessation.

Smokers from socioeconomically deprived background face more challenges and so need more effort to prevent relapse in smoking cessation.<sup>7</sup> Predictors of quit smoking behavior in the East for example in Malaysia and Thailand are not the same as those in the West.<sup>8,9</sup> This was thought to be due to different cultural background, socioeconomic and environmental conditions, social acceptability of smoking as well as disparities in tobacco control policies.<sup>8</sup> 80% of the smokers in the world live in the developing countries.<sup>2</sup> Hence, studies related to quit smoking behaviours in the relevant cultural and socioeconomic settings of developing countries are in need.

Malaysia is a developing country with a complex society in many aspects – ethnically, linguistically, culturally and religiously. In addition to the three major races of Malays, Chinese and Indians, there are also a myriad of indigenous ethnic groups. The different races here are encouraged to keep their own ethnic names and languages and to practise their respective religions but also to accept culture of other ethnic groups. Such diversity can make smoking cessation a more complicated task to handle for the medical practitioners.

Approximately 22.8% of Malaysians smoke.<sup>10</sup> The smoking rate for adult males is 43%<sup>10</sup> and for adult females is very low at 1.4%.<sup>10</sup> High prevalence of current smokers are linked to male, Malay, rural population, government servant and low educational background.<sup>10</sup> Ethnic wise, the prevalence of smokers was the highest among the Malays, followed by Indians then Chinese.<sup>10</sup> There is no statistics available for the indigenous groups. Over the past 12 months, 52.3% of its current smokers made an

1  
2 attempt to quit smoking.<sup>10</sup> Overall, less than 10% of current smokers visited a healthcare provider with  
3  
4 75.4% of them had been advised to quit smoking.<sup>10</sup>  
5  
6

7 This study aims to explore barriers to quitting smoking from the perspective of primary care .We chose a  
8  
9 qualitative study because “a qualitative study is able to capture expressive information about beliefs,  
10  
11 values, feelings, and motivations that underlie behaviours”<sup>11</sup> of participants. The process of comparing  
12  
13 and exploring smokers’ answers to our open questions can potentially lead us to ‘discover’ new patterns  
14  
15 of information regarding barriers to quitting smoking in this unique society. Primary care providers with  
16  
17 “whole person medical practice”<sup>12</sup> have the most opportunities to help smokers to quit smoking.  
18  
19 Nevertheless, grounded theory study from the perspectives of primary care is lacking. Identifying barriers  
20  
21 to quitting is an important step in both 5As and 5Rs approach<sup>13</sup> of brief intervention. Our data will help  
22  
23 primary care practitioners in smoking cessation counseling.  
24  
25  
26

## 27 **METHODS**

### 28 **Sampling and setting**

29  
30 This is a qualitative study registered and approved by Medical Research Ethics Committee of the Ministry  
31  
32 of Health Malaysia (Ethics approval NMRR-16-2113-33134). Participants were recruited by purposive  
33  
34 sampling. From our previous smoking related study in 2016-2017, we have a ready list of 191 participants  
35  
36 reported with previous failed quit attempts. Their demographic profile, smoking history and Fagerstrom test  
37  
38 for nicotine dependence level were also available. We contacted participants who were eligible by  
39  
40 telephone calls to explain the purpose and the nature of the study. Participants were given the option to  
41  
42 meet with investigators at Penang Medical College or their preferred location including their homes for an  
43  
44 interview. Sample size was determined on the basis of theoretical saturation. Subjects from both high  
45  
46 (Fagerstrom score 6-10)<sup>14</sup> and low nicotine dependence (Fagerstrom score 1-5)<sup>14</sup> were included. Twelve  
47  
48 invited smokers refused to participate in this study. Eight of them did not give any reason and the other  
49  
50 four stated that they were too busy. We did not manage to organize any focus group discussion (FGD)  
51  
52 as intended because our participants felt that they were too shy to speak in a group.  
53  
54  
55  
56  
57  
58  
59  
60

## Data collection

Formal informed written consent was obtained from all participants. Fifty-seven one to one individual in-depth interviews (IDI) were conducted. IDI were done by six interviewers in the team. Two of them were family physicians and lecturers (one male (KCT) and one female (KYC)) of Penang Medical College; three were fresh medical graduates (one male (KWL) and two females (CCT, XLC)) awaiting internship posting and one was a medical student (female (STO) from Ireland). KYC provided training in conducting the interviews for the rest of the team. Two pilot interviews were done. None of the interviewers were treating doctors or friends of the participants. Techniques used by interviewers include one to one open-ended questions, semi-structured format, conversational and intense probing for deeper meaning and understanding of the responses. Interviewers followed an interview guide (Table 1) which was consistent with the concept of being 'open' and "discovery" aiming to construct a particular theory. The initial question asked was open ended to facilitate participants to describe, to reflect and to express values in their own words. Subsequent questions were navigated by both participants' response and the pre-determined questions in the guide. Questions were phrased in a way to get very detailed answers from participants. Adherence to the guide was not necessary.

The interviews were conducted in participants' preferred language which included English, Malay, Mandarin and Hokkien dialect. The duration of interviews took about 20-60 minutes. The interviews were audio-recorded and transcribed verbatim. Interviews conducted in non- English were translated.

The interviewers met up with the participants once more to verify the accuracy and to correct any errors in the transcripts within 2 weeks of the initial interviews. At the same time, participants were encouraged to provide additional information if they wish.

**Table 1: Interview guide**

Opening question:

Please share with us your experience in quitting smoking in the past.

Prompts:

How many times have you tried/did you try (before you succeeded)? When was it?



1  
2  
3 How long did you stop for?

4 How did you stop smoking?

5  
6 What makes you resume smoking after stopping?

7  
8 What makes the process difficult?

9  
10 What is your reflection on this experience? What do you learn from this experience?

11  
12 Would you like to say something we haven't talked about and that is important for you?  
13  
14  
15

### 16 17 **Data analysis**

18 Data was anonymized and presented in the form of words. Thematic analysis driven by grounded theory  
19 methodology was employed. The analysis started with line-by-line open coding by all 6 researchers  
20 independently. The researchers then met for axial coding and clustering to develop master headings and  
21 subsequently higher categories. The process of analysis was facilitated by the techniques of constant  
22 comparison, memoing, continual checking and clustering of emerging themes. Finally, a theoretical model  
23 was formulated by linking the fragmented codes.<sup>15</sup> QDA Miner Lite software<sup>16</sup> was used to assist with  
24 code frequency analysis, coding retrieval and Boolean text search.  
25  
26  
27  
28  
29  
30  
31  
32  
33  
34

### 35 **Patient and public involvement**

36 This study was inspired by the results of a smoking related study of ours. In that study, "Assessing Airflow  
37 limitation Among Smokers In a Primary Care Setting" (<https://doi.org/10.21315/mjms2018.25.3.8.>), we  
38 found high prevalence of airflow limitation among smokers and from it implied urgency with helping  
39 smokers to quit smoking. We thought that we will break new ground with a grounded theory study. The  
40 patients and public were not involved in the design nor the recruitment and conduct of the study.  
41  
42  
43  
44  
45  
46  
47  
48  
49  
50  
51  
52  
53  
54  
55  
56  
57  
58  
59  
60

## RESULTS

Fifty- seven participants were interviewed. Participant demography was presented in table 2.

**Table 2: Study Sample characteristics (N =57 )**

| Demographic                    |            |
|--------------------------------|------------|
| Age, years, mean (SD)          | 58 (10.8)  |
| Mode                           | 50         |
| Range                          | 40-82      |
| Gender N (%)                   |            |
| Male                           | 56 (98%)   |
| Female                         | 1 (2%)     |
| Ethnicity N (%)                |            |
| Malay                          | 15(29.4%)  |
| Chinese                        | 32 (62.7%) |
| Indian                         | 4(7.8%)    |
| Education level N (%)          |            |
| Primary education              | 21 (36.8%) |
| Lower secondary                | 19 (33.3%) |
| Upper secondary                | 14 (24.6%) |
| Tertiary                       | 3 (5.3%)   |
| Fagestrom score N (%)          |            |
| High addiction (8-10)          | 8(14.0%)   |
| Moderate (5-7)                 | 14 (24.6%) |
| Low to moderate addiction(3-4) | 20(35.1%)  |
| Low addiction(0-2)             | 15 (26.3%) |

A descriptive model consisting of five themes emerged as main reasons for the failed quit attempts.

(Figure 1)

Insert figure 1

### Theme 1: Personal and Lifestyle Factors

Majority of participants were incapable of resisting temptation cues during their quit attempts. Temptation cue was described as an environment where the presence of smokers, when cigarette was exposed or easily accessed. Influence of friends who smoked in social activities or work places attributed to the relapse into smoking.

1  
2  
3  
4  
5  
6  
7  
*"I felt it was because I mingled with friends who are all smokers. So, if I am the only person who have the plan to stop smoking and mix with friends who are still smoking, that is why... because the cigarette is exposed. I don't have any choice" (Participant 17)*

8  
9  
10  
11  
12  
13  
14  
15  
16  
17  
18  
19  
20  
21  
22  
23  
24  
25  
26  
27  
28  
29  
30  
31  
32  
33  
34  
35  
36  
37  
38  
39  
40  
41  
42  
43  
44  
45  
46  
47  
48  
49  
50  
51  
52  
53  
54  
55  
56  
57  
58  
59  
60  
In the meantime, it was observed that relapse in smoking cessation was often related to impaired capacity for self-control and lack of intrinsic motivation.

*"Control... No power of control. Self-control weak, rather weak." (Participant 13)*

However, some participants showed that the decision to resume smoking was rather impulsive.

*"Yes, it is a mistake. Because I was already not looking for (cigarette) that time, I already was not craving, but just "try, try". After then, it was like learning again, learning again the taste slowly, it was like normal..... tried to discipline ah... Eer.. after one week, it was very hard, definitely very hard, want to find cigarette, than must resist, resist the temptation until 2 weeks then it went. Week 3, I feel that even the smells smoke form other smokers make me not comfortable, not because I was craving for cigarette but it was because it was like "stinky". After then, gradually one month, two months, it is ok lah. It is stable. 3rd month and 4th month like that, definitely I was not looking (for cigarette). After then, I started to have the urge for cigarette, so I want to try again, so it was my fault. It was like "play... play" smoke, smoke again, not because of addiction oh" (Participant 17)*

In addition, withdrawal of extrinsic factors that motivated our participants to stop smoking was the reason for them to resume smoking. A few circumstances had been described. For example, after sickness, out of prison, out of smoking free zone, no longer taking care for a sick mother or being nagged.

*"I was admitted to ICU for 5 times in IJN. So I "smoke back" after my bypass, I resumed smoking. (Participant 28)*

## Theme 2: Addiction

Cigarettes contain nicotine, which is highly addictive. It is the culprit in causing difficulties in smoking cessation among smokers. Participants reported withdrawal symptoms upon quitting.

1  
2  
3  
4  
5  
6  
7  
8  
9  
10  
11  
12  
13  
14  
15  
16  
17  
18  
19  
20  
21  
22  
23  
24  
25  
26  
27  
28  
29  
30  
31  
32  
33  
34  
35  
36  
37  
38  
39  
40  
41  
42  
43  
44  
45  
46  
47  
48  
49  
50  
51  
52  
53  
54  
55  
56  
57  
58  
59  
60

“...Stopped 1-2 months, I felt more tired.....If I didn't smoke, I was not able to open my bowel, I became constipated.....If I smoked at night, I slept better.”(Participant 26)

“I was feeling difficult, breathless at times. I also noticed that I had chest discomfort which was more when I work. I had no choice but to smoke again.”(Participant 51)

Cigarette was perceived as a companion. Many smokers reported that they smoke out of habit or feeling bored or lonely.

“I smoke back... because ... of addiction... feel like take cigarette. It is a habit, for example after meal, it is a habit to smoke cigarette... After breakfast, one sticks, after coffee... Drink, yes... and after lunch time...” (Participant 37)

“It's not because you're addicted or...like, err, withdrawal symptoms..... also not because of stress ... Err, just like...past time. (chuckle)..... it's like a hobby la.” (Participant 12)

Psychological dependence clearly highlighted the pleasure they experienced from smoking. There were also a handful of participants who described experiences which were strongly suggestive of psychological addiction to cigarette smoking, regardless if they realized it or not.

“That actual problem is our mind, the brain ...because why, you know? When we are not smoking, the brain will tell you: ‘There are other smokers there, could you ask him for one cigarette?’” (Participant 37)

“..... because for smoker you feel that something is missing. So, you tend to ask for a stick. Ask for a stick, you know. Then from then starts again. Two sticks..... “Participant 41)

### Theme 3: Socio-cultural Norms

Some participants expressed that the offering of cigarettes from friends and relatives was the main reason they failed their quit attempts. It was a local culture for smokers to offer their friends and relatives cigarettes as a sign of goodwill and close relationship.

“My friends.... They offer and we don't refuse it. We take it as a token of friendship” (participant 43)

1  
2 Moreover, our participants were persuaded by their close contacts to smoke even though they had initially  
3 expressed their quit smoking intention and had rejected the offer. The contacts gave them the impression  
4 that smoking a small amount of cigarettes would not affect their quit attempts. As a result, participants  
5  
6 reverted to smoke cigarettes.  
7  
8  
9

10  
11 *"I actually managed to quit – roughly 3 months. After that, I went for a course in Bangi. I went for a*  
12 *course in Bangi for a week. There, I had colleagues who smoke, they offered me. I said I didn't want*  
13 *because I've quitted. And they said, "Never mind, only one. Never mind." So he gave me, and I*  
14 *smoked. After that, after lunch, he offered me again. (Participant 9)*  
15  
16  
17  
18

19 Some participants expressed that it was easy to request a cigarette from the close contacts. The contacts  
20 did not attempt to advise or forbid them to smoke. Our participants felt the need to reciprocate their  
21 "kindness" by returning them cigarettes. This made our participants to buy and to keep cigarettes near  
22 them again.  
23  
24  
25  
26

27 For Muslim participants, the withdrawal of social and religious motivation post-fasting month increased the  
28 tendency to relapse.  
29  
30  
31

32 *"The month of puasa (fasting month), I was free for the 1 month. Don't want lah, I don't want to*  
33 *smoke in front of my family. Then, when if the time during iftar, that will waste a lot of time. So, I*  
34 *let myself relax for 1 month. I wanted to rest during fasting month. For my lungs to cleanse*  
35 *it....."After fasting month, I started back but less (cigarette). Sometimes 3-4 sticks, 5-6 sticks"*  
36  
37  
38  
39  
40 *(Participant 23)*  
41  
42  
43  
44  
45

#### 46 **Theme 4: Misconception**

47  
48

49 Smoking cessation is a complex and dynamic process in that most smokers make multiple stages among  
50 smoking, reduction, and abstinence.<sup>17</sup> However, our participants perceived quit smoking as a game of the  
51 mind.  
52  
53

54 *"..... to quit smoking depends on will power. for me, this is a game of the mind. We set our mind,*  
55  
56  
57  
58  
59  
60

1  
2 *tomorrow, I don't want to smoke tomorrow, then I will not smoke tomorrow.” (Participant 23)*

3  
4 *“I smoke for “saja” (for fun) not because of addiction. But if it is due to emotional problems, up to*  
5 *here (point to his head) then there are a lot of problems not solved, and the feeling is up to here*  
6 *(point to head), this is another experience, then there will be just cigarette only. When the mind is*  
7 *not calm, nah..... finish one stick then another again and again.”(Participant 17)*

8  
9  
10  
11  
12 Being a multiracial, multicultural and multi-religious country, it was not surprising that there were many  
13 myths, skewed personal beliefs and misconceptions that are deeply rooted in the society of Malaysia. We  
14 observed a wide variety of myths and beliefs to varying frequencies amongst the participants.

15  
16  
17  
18 Patients often trust their treating doctors and therefore take their doctors' words to heart. This would  
19 undoubtedly include tips, advice, beliefs and perceptions.

20  
21  
22  
23 *“I stopped abruptly, so I felt breathless. Then my family brought me to the hospital .....Then the*  
24 *doctor scolded me, “Did you want to die? You cannot stop (smoking) completely all of a sudden.*  
25 *If you want to stop, you need to come to the hospital and meet the MO (medical officer), the*  
26 *doctor, to get their advice. .... At least you have to smoke one a day.”(Participant 9 )*

27  
28  
29  
30  
31 There were a handful of participants who exaggerated or misinterpreted the effects of smoking cessation  
32 as harmful to health.

33  
34  
35  
36 *“I stopped for a few months then I became frightened. My friends said once stopped, disease will*  
37 *come, also I saw my friend (who) died after stopping (smoking).” (Participant 11)*

38  
39  
40  
41 *“There are side effects when stop smoking, after I stopped smoking, I was diagnosed as having high*  
42 *blood pressure and had a heart attack as well.”(Participant 28)*

43  
44  
45 On the other hand, there was one participant who believed that second-hand smoke was more harmful.

46  
47 *“If I breathe in second hand smoke, it is more poisonous than if I smoke myself. (Participant 1)*

48  
49 It was interesting to also highlight the belief that smoking might in fact be therapeutic.

50  
51 *“I had that disease (Idiopathic thrombocytopenic purpura) for a long period, I did not know. .... I*  
52 *suffered from gum bleeding during brushing teeth, sometimes spontaneously. So I resumed smoking,*  
53 *once smoking... the gum bleed stops. ....smoking is good” (Participant 33)*

1  
2 One participant commented that hand-rolled tobacco leaves were less hazardous than commercial  
3 cigarettes.  
4

5  
6 *“People said rokok daun (tobacco leaves) is better compare to cigarette. So I cannot “tahan”(stand)*  
7 *without smoking...after discharged from hospital, my friend recommended “rokok daun”(tobacco*  
8 *leaves) to me. The smell is there...I tried it and I continue to smoke.....At least, this “rokok daun” is*  
9 *better. And I managed to stop the cigarettes. (Participant 49)*  
10  
11  
12  
13

14  
15 Interestingly, there were participants who developed defense mechanisms themselves to ward off the  
16 concept that smoking is dangerous/unacceptable. This was particularly true when the participants felt  
17 obliged to refrain from smoking in the presence of young children or other family members.  
18  
19

20  
21 *“Sometimes I smoke alone in my own room. But I...I open the windows. My room has air-conditioner*  
22 *but I don't even turn it on..... “I turn on the fan to blow away all the smoke.” (Participant 6)*  
23  
24  
25  
26  
27

## 28 **Theme 5: Failed assisted smoking cessation**

29  
30 Some participants tried conventional methods (stop smoking clinic, nicotine replacement therapy) and  
31 alternative methods in their attempts to quit smoking. Most participants expressed that pharmacotherapy  
32 was ineffective. This perhaps resulted in a negative impression towards the effectiveness of stop smoking  
33 clinic. A range of medications were equally blamed by the participants.  
34  
35  
36

37 *“Smoking cessation clinic does not work. I tried chewing the gum, no use. Not working at all. Whatever*  
38 *medications they gave to stop smoking did not work. “(Participant 16)*  
39  
40

41  
42 *“I already bought the type of cigarettes the “blocked”, I am not sure if you have heard that before.*  
43 *The one with 3 cigarettes that is like when you smoke, it has no taste. May be you can quit, but I*  
44 *cannot. I brought from the pharmacy.”(Participant 18)*  
45  
46  
47  
48

49 The effectiveness of stop smoking clinic was also affected by non-pharmacological factors. These  
50 included the accessibility of the clinic and the language spoken. Language barrier was highlighted  
51 because there were multiple languages spoken in Malaysia.  
52  
53

54  
55 *“I have been to smoking cessation clinic two times. It is just too troublesome” (Participant 27)*  
56  
57  
58  
59  
60

1  
2  
3  
4  
5  
6  
7  
8  
9  
10  
11  
12  
13  
14  
15  
16  
17  
18  
19  
20  
21  
22  
23  
24  
25  
26  
27  
28  
29  
30  
31  
32  
33  
34  
35  
36  
37  
38  
39  
40  
41  
42  
43  
44  
45  
46  
47  
48  
49  
50  
51  
52  
53  
54  
55  
56  
57  
58  
59  
60

*“But I have gone there (stop smoking clinic). They were all Malay and my Malay is not very .... I did not really understand” (Participant 1)*

Some participants also noted that they did not know the methods available to quit smoking even though they were willing to try. Participants implied that medical practitioners did not convey and educate them methods available to quit smoking.

*“Doctors don't teach how to stop. And also nobody help you to stop. Do you think so? so you don't know the way to stop” (Participant 24)*

## DISCUSSION

Our participants which were represented by the 3 major races provided an in-depth account on their past quit attempts. In general, our subthemes were in congruent with that classified by the social determinants of health framework (SDHF) in model of the barriers to smoking cessation presented by Twyman et al<sup>18</sup> Nevertheless, our themes also highlighted a few important issues uniquely related to smoking cessation in this community, in particular themes like “misconception” and “social cultural norms”.

Offering cigarettes one to another is perceived as a sign of friendship and this cigarette culture serves as an impediment to quit smoking in this society. In China, offering cigarettes is a sign of mutual respect during social events.<sup>19,20</sup> It is customary for a subordinate to light up for his boss.<sup>20</sup> On the contrary, such cigarettes culture is not seen in western countries.<sup>20</sup> Smokers in our community need to be taught methods in rejecting offering of cigarettes with reassurance that declining an offer of cigarette is not rude.

Our participants revealed a number of myths which were considered to be rather different from those listed in the literature.<sup>21</sup> For example, misinformation and misconceptions led them to believe that reduction in tobacco consumption is acceptable but if quit smoking entirely will cause disease. Another myth is that secondhand smoking is more harmful than active smoking and therefore they believe that in a smoking environment, active smoking is encouraged. In addition, false believe that smoking may be therapeutic or smoking with the fan on or the hand-rolled cigarettes is less hazardous is present in this



1  
2 community. Some of these serious erroneous believe reflect low level of knowledge. Therefore, clinician  
3 should first assess and dispel the relevant false beliefs during counseling session.  
4

5  
6 To healthcare practitioners, tobacco smoking is regarded as an addiction disease. However, to patients, it  
7 is regarded as self-determined lifestyle choice.<sup>22</sup> Such discrepancy was observed in this study. It has  
8 long been established that nicotine addiction is the biggest cause of failure in smoking cessation. Nicotine  
9 can be as addictive as heroin, cocaine, or alcohol.<sup>23,24</sup> As a result, attempts to quit smoking are often  
10 unsuccessful because of withdrawal, stress, and weight gain.<sup>25</sup> Nevertheless, our participants did not  
11 perceive addiction as the major factor of failure, instead they expressed overwhelmingly that quitting  
12 smoking is a “game of mind”. Smokers blamed themselves as having poor determination in that stop  
13 smoking is a matter of how they control their mind. This finding is consistent with that of a recent  
14 quantitative study<sup>26</sup> which showed that most smokers believe willpower is necessary or sufficient for  
15 quitting. Such belief in mind control as the tool to quit smoking undermines the use of cessation  
16 assistance. The undermining of addiction of smoking renders smokers to “not believe” in the usefulness  
17 of pharmacotherapy.<sup>27</sup> The use of smoking cessation strategies in our setting has been low<sup>28</sup> and we  
18 believe such misconception is an important contributory factor. Participants were reluctant to receive  
19 professional help and preferred to “quit” by themselves. A national survey in 2016 in Malaysia revealed  
20 that nearly 80% of former smokers quit unaided, without any professional intervention.<sup>28</sup> More work is  
21 needed to get smokers to accept that cigarette smoking is highly addictive and nicotine addiction is very  
22 difficult to strike off. In addition, health care practitioners need to ensure sufficient patient knowledge to  
23 improve their confidence to acknowledge withdrawal symptoms and to focus more on the solution during  
24 cessation process.  
25  
26  
27  
28  
29  
30  
31  
32  
33  
34  
35  
36  
37  
38  
39  
40  
41  
42  
43

44 Smokers find it easy to stop smoking during Ramadan due to the religion, cultural and environmental  
45 influences.<sup>29</sup> Although many Muslim smokers (97.7%<sup>30</sup>) in Malaysia smoke fewer number of cigarettes  
46 during Ramadan but only 15 % perceived Ramadan as a strong motivator to quit smoking<sup>31</sup> and therefore  
47 most relapse after Ramadan. It is also known that such good smoking behaviour changes during  
48 Ramadan is associated with those with higher income, high nicotine dependence and those who are not  
49 aware that smoking is ‘haram’.<sup>29</sup> Such golden opportunity should be seized with implementation of  
50 religious-competent intervention to improve cessation rate.  
51  
52  
53  
54  
55  
56  
57  
58  
59  
60

1  
2 Future studies should also include the indigenous populations of Malaysia. These groups may experience  
3 different barriers to cessation. Besides, future studies to measure the effectiveness of our suggestion in  
4 exploring and overcoming barriers to smoking cessation could be done.  
5  
6  
7  
8  
9

## 10 **CONCLUSION**

11  
12 A model on the barrier to smoking cessation (fig 1) was developed from the themes emerged from this  
13 study. This may serve a guide to perform step 4 (assist) in 5A<sup>13</sup> and step 4 in (Roadblock) 5R<sup>13</sup> strategies  
14 in brief intervention, which is basically exploring barriers to smoking cessation. Subsequently,  
15 appropriate action plan can be tailored accordingly.  
16  
17  
18  
19  
20

## 21 **Acknowledgement**

22  
23 We thank all the participants in this study. We are grateful for their involvement and effort.  
24  
25  
26  
27

## 28 **Authors Contribution**

29  
30 KYC conceived the idea. KYC and LGG contributed to the design of the study. KYC, KWL, CCT, XLC,  
31 KCT and STO conducted the individual focus interview, translated and transcribed independently. KYC,  
32 KWL, CCT, XLC, KYC, STO carried out thematic analysis as a group and drafted the original manuscript.  
33  
34  
35  
36  
37  
38  
39  
40  
41  
42  
43  
44  
45  
46  
47  
48  
49  
50  
51  
52  
53  
54  
55  
56  
57  
58  
59  
60

**Funding** The authors received no funding for this work.

**Competing interests** None declared.

**Ethics approval** This study registered and approved by Medical Research Ethics Committee of the  
Ministry of Health Malaysia (Ethics approval NMRR-16-2113-33134).

**Provenance and peer review** Not commissioned; externally peer reviewed.

**Data sharing statement** All requests should be directed to the corresponding author.

## References

1. Foll BL, Pushparaj A, Pryslawsky Y, et al. Translational strategies for therapeutic development in nicotine addiction: Rethinking the conventional bench to bedside approach. *Prog Neuropsychopharmacol Biol Psychiatry* 2014;52:86-93. doi: 10.1016/j.pnpbp.2013.10.009
2. World Health Organisation. Tobacco: World Health Organisation; [updated May 2017. Available from: <http://www.who.int/mediacentre/factsheets/fs339/en/> accessed January 20, 2018.
3. Babb S, Malarcher A, Schauer G, et al. Quitting Smoking Among Adults - United States, 2000-2015. *MMWR Morb Mortal Wkly Rep* 2017;65(52):1457-64. doi: 10.15585/mmwr.mm6552a1 [published Online First: 2017/01/06]
4. Chaiton M, Diemert L, Cohen JE, et al. Estimating the number of quit attempts it takes to quit smoking successfully in a longitudinal cohort of smokers. *BMJ Open* 2016;6(6):e011045. doi: 10.1136/bmjopen-2016-011045 [published Online First: 2016/06/12]
5. Hughes JR, Keely J, Naud S. Shape of the relapse curve and long-term abstinence among untreated smokers. *Addiction* 2004;99(1):29-38. [published Online First: 2003/12/18]
6. Tobacco Use and Dependence Guideline Panel. Treating Tobacco Use and Dependence: 2008 Update. 6, Evidence and Recommendations. : Rockville (MD): US Department of Health and Human Services. Available from: <https://www.ncbi.nlm.nih.gov/books/NBK63943>.
7. Van Schayck OCP, Williams S, Barchilon V, et al. Treating tobacco dependence: guidance for primary care on life-saving interventions. Position statement of the IPCRG. *NPJ Prim Care Respir Med* 2017;27(1):38. doi: 10.1038/s41533-017-0039-5
8. Li L, Borland R, Yong H-H, et al. Predictors of smoking cessation among adult smokers in Malaysia and Thailand: Findings from the International Tobacco Control Southeast Asia Survey. *Nicotine Tob Res* 2010;12(Suppl 1):S34-S44. doi: 10.1093/ntr/ntq030
9. Wee LH, Shahab L, Bulgiba A, et al. Stop smoking clinics in Malaysia: characteristics of attendees and predictors of success. *Addict Behav* 2011;36(4):400-3. doi: 10.1016/j.addbeh.2010.11.011 [published Online First: 2011/01/05]
10. Institute for Public Health (IPH) 2015. National Health and Morbidity Survey 2015 (NHMS 2015). Vol. II: Non-Communicable Diseases, Risk Factors & Other Health Problems;: Ministry of Health Malaysia, 2015.
11. Berkwits M, Inui TS. Making Use of Qualitative Research Techniques. *J Gen Intern Med* 1998;13(3):195-99. doi: 10.1046/j.1525-1497.1998.00054.x
12. Stewart M. Reflections on the doctor-patient relationship: from evidence and experience. *Br J Gen Pract* 2005;55(519):793-801.
13. Ministry of Health Maldives. National Tobacco Cessation Toolkit (5A & 5Rs) for all doctors and health professionals: Tobacco Prevention & Control Program, Health Promotion and Chronic Disease Control Division of Health Protection Agency, and Tobacco Cessation Clinic, Dhamanaveshi, Male', Ministry of Health, Maldives; 29th August 2016 [Available from: <http://www.searo.who.int/maldives/documents/tobacco-cessation-toolkit.pdf?ua=1> accessed 27 June 2018 2018.
14. Heatherton TF, Kozlowski LT, Frecker RC, et al. The Fagerstrom Test for Nicotine Dependence: A revision of the Fagerstrom Tolerance Questionnaire. *Br J Addict* 1991;86(9):1119-27. [published Online First: 1991/09/01]
15. Glaser BG. Theoretical sensitivity: advances in the methodology of grounded theory. Mill Valley, Calif.: Sociology Press 1978.

16. Nagle B. Qualitative Data Tool: Using QDA Miner Lite Association For Institutional Research. Data and Decisions for Higher Education; [Available from: <https://www.airweb.org/eAIR/techtips/Pages/QDA-Miner-Lite.aspx> accessed January 27 2018.
17. Hughes JR, Solomon LJ, Naud S, et al. Natural History of Attempts to Stop Smoking. *Nicotine Tob Res* 2014;16(9):1190-98. doi: 10.1093/ntr/ntu052
18. Twyman L, Bonevski B, Paul C, et al. Perceived barriers to smoking cessation in selected vulnerable groups: a systematic review of the qualitative and quantitative literature. *BMJ Open* 2014;4(12) doi: 10.1136/bmjopen-2014-006414
19. Wang J, Li C, Jia C, et al. Smoking, smoking cessation and tobacco control in rural China: a qualitative study in Shandong Province. *BMC Public Health* 2014;14:916. doi: 10.1186/1471-2458-14-916
20. China Daily. China's cigarette culture 2014 [updated Updated: 2014-01-09 16:52. Available from: [http://www.chinadaily.com.cn/china/2014-01/09/content\\_17226897.htm](http://www.chinadaily.com.cn/china/2014-01/09/content_17226897.htm) accessed June 30 2018.
21. Frieden TR, Blakeman DE. The Dirty Dozen: 12 Myths That Undermine Tobacco Control. *Am J Public Health* 2005;95(9):1500-05. doi: 10.2105/AJPH.2005.063073
22. Breitling LP, Rothenbacher D, Stegmaier C, et al. Older Smokers' Motivation and Attempts to Quit Smoking: Epidemiological Insight into the Question of Lifestyle Versus Addiction. *Dtsch Arztebl Int*. 2009;106(27):451-55. doi: 10.3238/arztebl.2009.0451
23. Stolerman IP, Jarvis MJ. The scientific case that nicotine is addictive. *Psychopharmacology (Berl)* 1995;117(1):2-10; discussion 14-20. [published Online First: 1995/01/01]
24. Henningfield JE, Cohen C, Slade JD. Is nicotine more addictive than cocaine? *Br J Addict* 1991;86(5):565-9. [published Online First: 1991/05/01]
25. Cohen C, Pickworth WB, Henningfield JE. Cigarette smoking and addiction. *Clin Chest Med* 1991;12(4):701-10. [published Online First: 1991/12/01]
26. Hughes JR, Naud S. Perceived role of motivation and self-efficacy in smoking cessation: A secondary data analysis. *Addict Behav* 2016;61:58-61. doi: <https://doi.org/10.1016/j.addbeh.2016.05.010>
27. Morphett K, Partridge B, Gartner C, et al. Why Don't Smokers Want Help to Quit? A Qualitative Study of Smokers' Attitudes towards Assisted vs. Unassisted Quitting. *Int J Environ Res Public Health* 2015;12(6):6591-607. doi: 10.3390/ijerph120606591
28. Ministry of Health Malaysia Academy of Pharmacy Malaysia. CLINICAL PRACTICE GUIDELINES ON TREATMENT OF TOBACCO USE DISORDER Putrajaya, Malaysia: Tobacco Control Unit & FCTC Secretariat; 2017 [Available from: [http://www.moh.gov.my/penerbitan/CPG2017/Respiratory/CPG\\_TobaccoDisorder.pdf](http://www.moh.gov.my/penerbitan/CPG2017/Respiratory/CPG_TobaccoDisorder.pdf) accessed February 6 2018.
29. Ismail S, Mohd Zulkefli NA, Chung CS, et al. Factors influencing smoking behaviour changes during Ramadan among Malay male students. *Journal of Fasting and Health* 2015;3(3):97-102. doi: 10.22038/jfh.2015.4738
30. Abu Bakar AM JL, Nasir AM, Anselm ST, Chan WH, Rahman NA, Ibrahim N, Nirmala BP, Omar NM. Religious belief in relation to smoking: a cross-sectional study among Muslim males in the month of Ramadan. *Malaysian J Med Health Sci* 2002;2(2):32-35.
31. Yong H-H, Hamann SL, Borland R, et al. Adult smokers' perception of the role of religion and religious leadership on smoking and association with quitting: A comparison between Thai Buddhists and Malaysian Muslims. *Soc Sci Med (1982)* 2009;69(7):1025-31. doi: 10.1016/j.socscimed.2009.07.042

1  
2  
3  
4  
5  
6  
7  
8  
9  
10  
11  
12  
13  
14  
15  
16  
17  
18  
19  
20  
21  
22  
23  
24  
25  
26  
27  
28  
29  
30  
31  
32  
33  
34  
35  
36  
37  
38  
39  
40  
41  
42  
43  
44  
45  
46  
47  
48  
49  
50  
51  
52  
53  
54  
55  
56  
57  
58  
59  
60

**Figure legends**

Figure 1: Model of barriers to smoking cessation in primary care

-  Barriers modifiable through long term strategies
-  Barriers modifiable through medium term strategies
-  Barriers modifiable through short term strategies

For peer review only

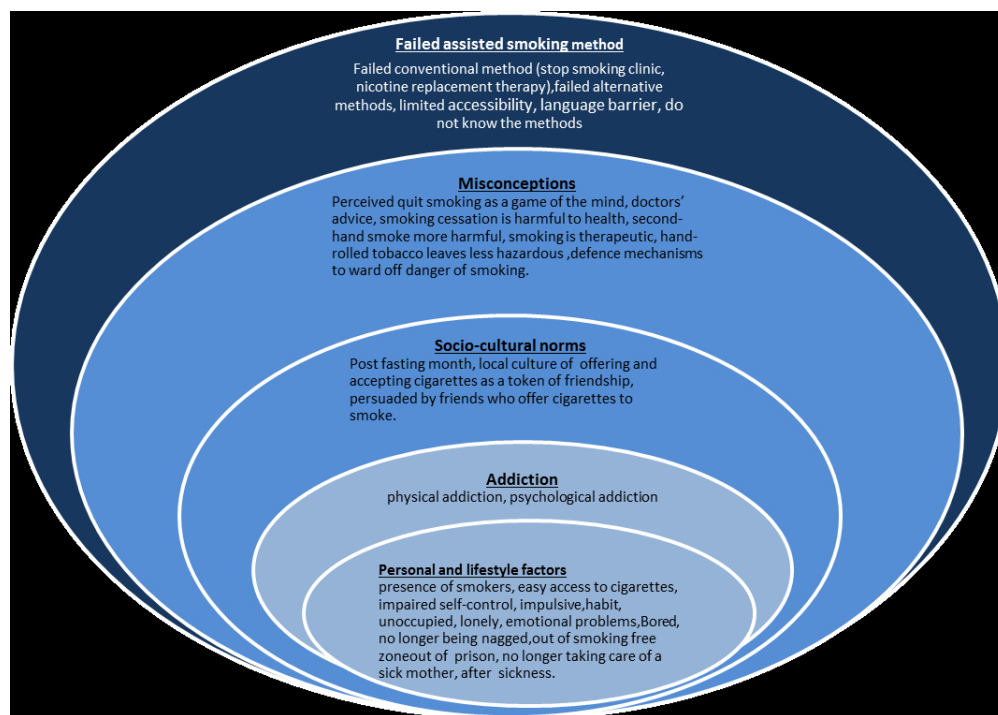

90x64mm (300 x 300 DPI)

## COREQ (CONsolidated criteria for REporting Qualitative research) Checklist

A checklist of items that should be included in reports of qualitative research. You must report the page number in your manuscript where you consider each of the items listed in this checklist. If you have not included this information, either revise your manuscript accordingly before submitting or note N/A.

| Topic                                          | Item No. | Guide Questions/Description                                                                                                                              | Reported on Page No. |
|------------------------------------------------|----------|----------------------------------------------------------------------------------------------------------------------------------------------------------|----------------------|
| <b>Domain 1: Research team and reflexivity</b> |          |                                                                                                                                                          |                      |
| <i>Personal characteristics</i>                |          |                                                                                                                                                          |                      |
| Interviewer/facilitator                        | 1        | Which author/s conducted the interview or focus group?                                                                                                   |                      |
| Credentials                                    | 2        | What were the researcher's credentials? E.g. PhD, MD                                                                                                     |                      |
| Occupation                                     | 3        | What was their occupation at the time of the study?                                                                                                      |                      |
| Gender                                         | 4        | Was the researcher male or female?                                                                                                                       |                      |
| Experience and training                        | 5        | What experience or training did the researcher have?                                                                                                     |                      |
| <i>Relationship with participants</i>          |          |                                                                                                                                                          |                      |
| Relationship established                       | 6        | Was a relationship established prior to study commencement?                                                                                              |                      |
| Participant knowledge of the interviewer       | 7        | What did the participants know about the researcher? e.g. personal goals, reasons for doing the research                                                 |                      |
| Interviewer characteristics                    | 8        | What characteristics were reported about the interviewer/facilitator? e.g. Bias, assumptions, reasons and interests in the research topic                |                      |
| <b>Domain 2: Study design</b>                  |          |                                                                                                                                                          |                      |
| <i>Theoretical framework</i>                   |          |                                                                                                                                                          |                      |
| Methodological orientation and Theory          | 9        | What methodological orientation was stated to underpin the study? e.g. grounded theory, discourse analysis, ethnography, phenomenology, content analysis |                      |
| <i>Participant selection</i>                   |          |                                                                                                                                                          |                      |
| Sampling                                       | 10       | How were participants selected? e.g. purposive, convenience, consecutive, snowball                                                                       |                      |
| Method of approach                             | 11       | How were participants approached? e.g. face-to-face, telephone, mail, email                                                                              |                      |
| Sample size                                    | 12       | How many participants were in the study?                                                                                                                 |                      |
| Non-participation                              | 13       | How many people refused to participate or dropped out? Reasons?                                                                                          |                      |
| <i>Setting</i>                                 |          |                                                                                                                                                          |                      |
| Setting of data collection                     | 14       | Where was the data collected? e.g. home, clinic, workplace                                                                                               |                      |
| Presence of non-participants                   | 15       | Was anyone else present besides the participants and researchers?                                                                                        |                      |
| Description of sample                          | 16       | What are the important characteristics of the sample? e.g. demographic data, date                                                                        |                      |
| <i>Data collection</i>                         |          |                                                                                                                                                          |                      |
| Interview guide                                | 17       | Were questions, prompts, guides provided by the authors? Was it pilot tested?                                                                            |                      |
| Repeat interviews                              | 18       | Were repeat interviews carried out? If yes, how many?                                                                                                    |                      |
| Audio/visual recording                         | 19       | Did the research use audio or visual recording to collect the data?                                                                                      |                      |
| Field notes                                    | 20       | Were field notes made during and/or after the interview or focus group?                                                                                  |                      |
| Duration                                       | 21       | What was the duration of the interviews or focus group?                                                                                                  |                      |
| Data saturation                                | 22       | Was data saturation discussed?                                                                                                                           |                      |
| Transcripts returned                           | 23       | Were transcripts returned to participants for comment and/or                                                                                             |                      |

| Topic                                  | Item No. | Guide Questions/Description                                                                                                        | Reported on Page No. |
|----------------------------------------|----------|------------------------------------------------------------------------------------------------------------------------------------|----------------------|
|                                        |          | correction?                                                                                                                        |                      |
| <b>Domain 3: analysis and findings</b> |          |                                                                                                                                    |                      |
| <i>Data analysis</i>                   |          |                                                                                                                                    |                      |
| Number of data coders                  | 24       | How many data coders coded the data?                                                                                               |                      |
| Description of the coding tree         | 25       | Did authors provide a description of the coding tree?                                                                              |                      |
| Derivation of themes                   | 26       | Were themes identified in advance or derived from the data?                                                                        |                      |
| Software                               | 27       | What software, if applicable, was used to manage the data?                                                                         |                      |
| Participant checking                   | 28       | Did participants provide feedback on the findings?                                                                                 |                      |
| <i>Reporting</i>                       |          |                                                                                                                                    |                      |
| Quotations presented                   | 29       | Were participant quotations presented to illustrate the themes/findings?<br>Was each quotation identified? e.g. participant number |                      |
| Data and findings consistent           | 30       | Was there consistency between the data presented and the findings?                                                                 |                      |
| Clarity of major themes                | 31       | Were major themes clearly presented in the findings?                                                                               |                      |
| Clarity of minor themes                | 32       | Is there a description of diverse cases or discussion of minor themes?                                                             |                      |

Developed from: Tong A, Sainsbury P, Craig J. Consolidated criteria for reporting qualitative research (COREQ): a 32-item checklist for interviews and focus groups. *International Journal for Quality in Health Care*. 2007. Volume 19, Number 6: pp. 349 – 357

**Once you have completed this checklist, please save a copy and upload it as part of your submission. DO NOT include this checklist as part of the main manuscript document. It must be uploaded as a separate file.**



# BMJ Open

## Barriers to Smoking Cessation in Malaysia– A Grounded Theory Study from the Perspective of Primary Care

|                                 |                                                                                                                                                                                                                                                                                                                                                                                                                                  |
|---------------------------------|----------------------------------------------------------------------------------------------------------------------------------------------------------------------------------------------------------------------------------------------------------------------------------------------------------------------------------------------------------------------------------------------------------------------------------|
| Journal:                        | <i>BMJ Open</i>                                                                                                                                                                                                                                                                                                                                                                                                                  |
| Manuscript ID                   | bmjopen-2018-025491.R1                                                                                                                                                                                                                                                                                                                                                                                                           |
| Article Type:                   | Research                                                                                                                                                                                                                                                                                                                                                                                                                         |
| Date Submitted by the Author:   | 16-Nov-2018                                                                                                                                                                                                                                                                                                                                                                                                                      |
| Complete List of Authors:       | Chean, Kooi-Yau; Penang Medical College, Family Medicine<br>Goh, Lee Gan; National University Health System, Family Medicine<br>Liew, Kah-Weng; Penang Medical College, Family Medicine<br>Tan, Chia-Chia; Penang Medical College, Family Medicine<br>Choi, Xin-Ling; Penang Medical College, Family Medicine<br>Tan, Kean-Chye; Penang Medical College, Family Medicine<br>Ooi, Siew-Ting; University of Dublin Trinity College |
| <b>Primary Subject Heading</b>: | Smoking and tobacco                                                                                                                                                                                                                                                                                                                                                                                                              |
| Secondary Subject Heading:      | General practice / Family practice, Addiction, Qualitative research                                                                                                                                                                                                                                                                                                                                                              |
| Keywords:                       | barriers, smoking cessation, grounded theory study, qualitative study, PRIMARY CARE, Malaysia                                                                                                                                                                                                                                                                                                                                    |
|                                 |                                                                                                                                                                                                                                                                                                                                                                                                                                  |

SCHOLARONE™  
Manuscripts

1  
2  
3 **Barriers to Smoking Cessation in Malaysia– A Grounded Theory Study from**  
4 **the Perspective of Primary Care.**  
5  
6  
7

8  
9 **Authors:**

10  
11 CHEAN, Kooi-Yau<sup>1\*</sup>  
12 GOH, Lee-Gan<sup>2</sup>  
13 LIEW, Kah-Weng<sup>1</sup>  
14 TAN, Chia-Chia<sup>1</sup>  
15 CHOI, Xin-Ling<sup>1</sup>  
16 TAN, Kean-Chye<sup>1</sup>  
17 OOI, Siew-Ting<sup>3</sup>  
18  
19  
20  
21

22 **Authors' affiliation(s):**

23  
24 <sup>1</sup>*Department of Family Medicine, Penang Medical College. Penang. 4, Jalan Sepoy Lines.*  
25 *10450 Penang. Malaysia.*  
26

27 <sup>2</sup>*Department of Family Medicine, National University Health System, Singapore. Level 9. Tower*  
28 *Block, 1E, Kent Ridge Road. Singapore*  
29

30 <sup>3</sup>*Trinity College Dublin. School of Medicine. Dublin 2, Ireland.*  
31  
32

33  
34  
35 **Corresponding Author:**

36  
37 Kooi-Yau CHEAN FRNZCGP  
38 Department of Family Medicine,  
39 Penang Medical College.  
40 4, Jalan Sepoy Lines. 10450 Penang. Malaysia.  
41 E mail: [kychean@rcsiucd.edu.my](mailto:kychean@rcsiucd.edu.my)  
42 Tel: +6042171923, +6042171999  
43  
44

45  
46 Word count: 4153

47  
48 Keywords: smoking cessation, qualitative study, Malaysia, barriers, grounded theory,  
49 primary care  
50  
51  
52  
53  
54  
55  
56  
57  
58  
59  
60

## ARTICLE SUMMARY

### Strengths and limitations of this study

- As a grounded theory study from the perspective of primary care, this paper contributes to the currently limited literature generated on patients' lived experiences of their quit attempts.
- A diversity of participants from different races and from both high and low nicotine dependence were recruited.
- The use of in-depth qualitative methods allowed detailed account of smokers' experience in smoking cessation.
- No focus group interview was done in this study because of participant reluctance. The opportunity to observe the interaction among participants was unavailable.

## ABSTRACT

**Objectives** This study aims to construct a model of barriers to smoking cessation in the primary care setting.

**Design** Individual in-depth, semi-structured interviews were audiotaped, then verbatim transcribed and translated when necessary. The data was first independently coded and then collectively discussed for emergent themes using the Straussian grounded theory method.

**Participants and Setting** Fifty-seven current smokers were recruited from a previous smoking related study carried out in a primary care setting in Malaysia. Current smokers with at least one failed quit attempt were included.

**Results** A five-theme model emerged from this grounded theory method. (1) Personal and lifestyle factors: Participants were unable to resist the temptation to smoke; (2) Nicotine addiction: Withdrawal symptoms could not be overcome; (3) Social cultural norms: Participants identified accepting cigarettes from friends as a token of friendship to be problematic; (4) Misconception: Perception among smokers that ability to quit was solely based on one's ability to achieve mind control, and perception that stopping smoking will harm the body; and (5) Failed assisted smoking cessation: services were not user friendly and incomprehensible. The themes were organised into 5 concentric circles based on time frame: those actionable in the short term (themes 1 & 2); the medium term (themes 3 & 4); and the long term (theme 5).

**Conclusions** Five categories of specific beliefs and practices prevented smokers from quitting. Clinicians need to work on these factors to help patients overcome barriers to smoking cessation guided by the time frames recommended by the authors.

(242 words)

## INTRODUCTION

Cigarette smoking harms almost every organ of the body resulting in premature death in half of all smokers<sup>1</sup> and out of the over one billion smokers in the world.<sup>2</sup> Quit smoking can save lives. The prevalence of ever having tried to quit smoking varies in different countries. Less than 20% of smokers in China and Malaysia reported recent attempts to quit.<sup>3</sup> The estimated number of attempts before quitting successfully ranged from 6.1 to 142<sup>4</sup>; the abstinence rate at 6 months is only 3%-5% among those who self-quit<sup>5</sup> and 19%-33% among those who opt for pharmacotherapy.<sup>6</sup> We must therefore take a hard look from a variety of perspectives to understand the reasons contributing to failures in smoking cessation.

Eighty percent of smokers in the world live in developing countries.<sup>2</sup> Hence, studies related to quit smoking behaviours conducted in the relevant cultural and socioeconomic settings of developing countries are needed.

Malaysia is a developing country with a complex society—ethnically, linguistically, culturally and in religious faiths. It has three major races of Malays, Chinese and Indians, and numerous indigenous ethnic groups. Such ethnic and cultural diversity can make smoking cessation a more complicated task for medical practitioners.

Approximately 22.8% of Malaysians smoke.<sup>7</sup> The smoking rate for adult males is 43%<sup>7</sup> and for adult females is 1.4%.<sup>7</sup> The high prevalence of current smokers are associated with males, the Malays, the rural population, government servant and low educational background.<sup>7</sup> By ethnic distribution, the prevalence of smokers was the highest among the Malays, followed by Indians, then Chinese.<sup>7</sup> There are no statistics available for indigenous groups. Over the past 12 months, 52.3% of current smokers in Malaysia made an attempt to quit smoking.<sup>7</sup> Overall, less than 10% of current smokers visited a healthcare provider with 75.4% of them having been advised to quit smoking.<sup>7</sup>

This study aims to explore barriers to quitting smoking from the perspective of primary care. We chose a qualitative study because “a qualitative study is able to capture expressive information about beliefs, values, feelings, and motivations that underlie behaviours”<sup>8</sup> of participants. The process of comparing and exploring smokers’ answers to our open questions can potentially lead us to ‘discover’ new patterns of information regarding barriers to quitting smoking in this unique society. Primary care

1  
2  
3 providers with “whole person medical practice”<sup>9</sup> have the most opportunities to help smokers to quit  
4 smoking. Nevertheless, grounded theory study from the perspectives of primary care is lacking.  
5  
6 Identifying barriers to quitting is an important step in both the 5As approach (Ask, Advise, Assess,  
7 Assist, and Arrange) and the 5Rs approach(Relevance, Risks, Rewards, Roadblocks, and  
8 Repetition)<sup>10</sup> in brief intervention. Our study will help primary care practitioners in smoking cessation  
9 counseling.  
10  
11  
12  
13  
14

## 15 **METHODS**

### 16 **Study design**

17  
18 This study was inspired by the results of a smoking related study of ours. “Assessing Airflow limitation  
19 Among Smokers in a Primary Care Setting” (<https://doi.org/10.21315/mjms2018.25.3.8.>). In that study,  
20 the authors found a high prevalence of airflow limitation among smokers and from it implied urgency  
21 in helping smokers to quit smoking. Grounded theory study design was chosen as it will break new  
22 ground in understanding barriers to smoking cessation. This is a “general method of comparative  
23 analysis”<sup>11</sup> without pre-existing conceptualization to uncover social processes, a theory can be  
24 constructed through the interaction of the data analysed.<sup>12</sup> Details of data analysis are covered below.  
25  
26  
27  
28  
29  
30  
31  
32  
33

### 34 **Setting and Sample**

35  
36 This study was conducted in Penang, Malaysia between January to February 2017. Participants were  
37 recruited by purposive sampling. This is a “non-probability” and a criterion based sampling  
38 technique.<sup>13</sup> Subjects were selected based on certain characteristics they have, which will enable a  
39 holistic and in-depth exploration of the research topic. From a previous smoking related study in 2016-  
40 2017, the authors had a ready list of 191 participants with at least one failed quit attempt. Their  
41 demographic profile, smoking history and Fagestrom test for nicotine dependence level were also  
42 available. Eligible participants were contacted by telephone calls to explain the purpose and the  
43 nature of the study. Participants had the option to meet with investigators at Penang Medical College  
44 or their preferred location, including their homes for an interview. Sample size was determined on the  
45 basis of theoretical saturation. Subjects from both high (Fagerstrom score 6-10)<sup>14</sup> and low nicotine  
46 dependence (Fagestrom score 1-5)<sup>14</sup> were included. Twelve invited smokers refused to participate in  
47 this study. Eight of them did not give any reason and the other four stated that they were too busy.  
48  
49  
50  
51  
52  
53  
54  
55  
56  
57  
58  
59  
60

1  
2  
3 We did not manage to organize any focus group discussion (FGD) as intended because our  
4  
5 participants felt that they were too shy to speak in a group  
6  
7

### 8 **Data collection**

9  
10 Formal informed written consent was obtained from all participants. Fifty-seven one-to-one individual  
11  
12 in-depth interviews (IDI) were conducted. IDIs were done by our team of six interviewers. The team  
13  
14 comprised of two family physicians and lecturers -Tan KC (male) and Chean KY (female) from  
15  
16 Penang Medical College; three medical graduates awaiting internship posting - Liew KW (male), Tan  
17  
18 CC (female) and Choi XL (female) and one medical student - Ooi ST (female) from Ireland. Chean KY  
19  
20 provided training in conducting the interviews for the rest of the team. Two pilot interviews were done.  
21  
22 None of the interviewers were treating doctors or friends of the participants. Techniques used by  
23  
24 interviewers were one to one, open-ended questions, semi-structured format, conversational with  
25  
26 intense probing for deeper meaning and understanding of the responses. Interviewers followed an  
27  
28 interview guide (Table 1) which was consistent with the concept of being 'open' and "discovery"  
29  
30 aiming to construct a particular theory. The initial question asked was open ended to facilitate  
31  
32 participants to describe, to reflect and to express values in their own words. Subsequent questions  
33  
34 were navigated by both participants' response and the pre-determined questions in the guide.  
35  
36 Questions were phrased in a way to get very detailed answers from participants.  
37

38 The interviews were conducted in participants' preferred language which included English, Malay,  
39  
40 Mandarin and Hokkien dialect. The duration of interviews took about 20-60 minutes. The interviews  
41  
42 were audio-recorded and transcribed verbatim. Interviews conducted in non-English languages were  
43  
44 translated.  
45

46 The interviewers met up with the participants once more to verify the accuracy and to correct any  
47  
48 transcription error within 2 weeks of the initial interviews. At the same time, participants were  
49  
50 encouraged to provide additional information if they wish.  
51

52 Table 1: Interview guide

54 Opening question:

55 Please share with us your experience in quitting smoking in the past.

57 Prompts:  
58  
59  
60

1  
2  
3 How many times have you tried/did you try (before you succeeded)? When was it?  
4  
5 How long did you stop for?  
6  
7 How did you stop smoking?  
8  
9 What caused you to resume smoking after stopping?  
10  
11 What makes the process difficult?  
12  
13 What is your reflection on this experience? What did you learn from this experience?  
14  
15 Would you like to say something we haven't talked about and that is important for you?  
16

### 17 18 19 **Data analysis**

20 Data was anonymized and transcribed. The researchers started the analysis with line-by-line open  
21 coding by all six researchers independently to ensure that the analysis was holistic and inductive.  
22  
23 They then met for axial coding and clustering to develop master headings and subsequently higher  
24 categories. The process of analysis was facilitated by the techniques of constant comparison, keeping  
25 one another informed through the use of memos, continual checking and clustering of emerging  
26 themes. Finally, a theoretical model was formulated by linking the fragmented codes.<sup>15</sup> QDA Miner  
27 Lite software<sup>16</sup> was used to assist with code frequency analysis, coding retrieval and Boolean text  
28 search.  
29

### 30 31 32 33 34 35 36 **Patient and public involvement**

37 Patients and public were not involved in the design nor the recruitment and conduct of the study. This  
38 study was registered and approved by the Medical Research Ethics Committee of the Ministry of  
39 Health Malaysia (Ethics approval NMRR-16-2113-33134).  
40  
41  
42  
43  
44  
45  
46

## 47 48 **RESULTS**

49 Table 2: Demographic characteristics of participants (n=57)

### 50 **Demography Characteristics**

|    |                       |            |
|----|-----------------------|------------|
| 51 | Age, years, mean (SD) | 58 (10.8)  |
| 52 | Mode                  | 50         |
| 53 | Range                 | 40-82      |
| 54 | Gender, n (%)         |            |
| 55 | Male                  | 56 (98%)   |
| 56 | Female                | 1 (2%)     |
| 57 | Ethnicity, n (%)      |            |
| 58 | Malay                 | 15 (29.4%) |
| 59 | Chinese               | 32 (62.7%) |
| 60 |                       |            |



|                                                         |            |
|---------------------------------------------------------|------------|
| Indian                                                  | 4 (7.8%)   |
| Education level, n (%)                                  |            |
| Primary education                                       | 21 (36.8%) |
| Lower secondary                                         | 19 (33.3%) |
| Upper secondary                                         | 14 (24.6%) |
| Tertiary                                                | 3 (5.3%)   |
| Fagestrom score, n (%)                                  |            |
| High addiction (8-10)                                   | 8 (14.0%)  |
| Moderate (5-7)                                          | 14 (24.6%) |
| Low to moderate addiction(3-4)                          | 20 (35.1%) |
| Low addiction(0-2)                                      | 15 (26.3%) |
| Marital status, n (%)                                   |            |
| Single                                                  | 10 (17.4%) |
| Married                                                 | 43 (75.4%) |
| Divorced                                                | 3 (0.05%)  |
| Widowed                                                 | 1 (0.02%)  |
| Previous attendance at smoking cessation clinics, n (%) |            |
| Yes                                                     | 19 (33.3%) |
| No                                                      | 38 (66.6%) |

Table 2 shows the demographic characteristics of the fifty- seven participants were interviewed

## Themes generated from grounded theory

### Theme 1: Personal and lifestyle factors

A majority of abstinent participants were unable to resist temptation cues when challenged. Their relapses into smoking were attributed to the influence of friends who smoked in social activities or work places.

*"I felt it was because I mingled with friends who are all smokers. So, if I am the only person who has the plan to stop smoking and mix with friends who are still smoking, that is why... because the cigarette is exposed. I don't have any choice." (Participant 17)*

Participants conceded that relapses in smoking cessation were often related to impaired capacity for self-control and lack of intrinsic motivation.

*"Control... No power of control. Self-control weak, rather weak." (Participant 13)*

Some participants related that the decision to resume smoking was rather impulsive.

*"Yes, it is a mistake. Because I was already not looking for (cigarette) that time, I already was not craving, but just "try, try". After then, it was like learning again, learning again the taste slowly, it was like normal..... tried to discipline ah... eer.. After one week, it was*

1  
2  
3 *very hard, definitely very hard, (I) want to find a cigarette, then (I) must resist, resist the*  
4 *temptation until 2 weeks then it went. By week 3, I feel that even the smells smoke from*  
5 *other smokers make me not comfortable; not because I was craving for a cigarette, but it*  
6 *was because it was like “stinky”. After then, gradually one month, two months, it is ok lah. It*  
7 *is stable. By 3rd month and 4th month like that, definitely I was not looking (for a cigarette).*  
8 *After then, I started to have the urge for a cigarette, so I want to try again, so it was my fault.*  
9 *It was like “play... play” smoke, smoke again, not because of addiction oh.” (Participant 17)*

16 In addition, withdrawal of extrinsic factors that motivated our participants to stop smoking was the  
17 reason for them to resume smoking. A few circumstances had been described. For example, after  
18 sickness, out of prison, out of smoking free zone, no longer taking care for a sick mother or being  
19 nagged.

24 *“I was admitted to ICU (intensive care unit) for 5 times in IJN (National Heart Institute). So I*  
25 *“smoke back” after my bypass, I resumed smoking.” (Participant 28)*

## 29 Theme 2: Nicotine addiction

31 Cigarettes contain nicotine, which is highly addictive. Participants reported overpowering withdrawal  
32 symptoms upon quitting.

35 *“...Stopped 1-2 months, I felt more tired.....If I didn’t smoke, I was not able to open my bowel, I*  
36 *became constipated.....If I smoked at night, I slept better.”(Participant 26)*

40 *“I was feeling difficult, breathless at times. I also noticed that I had chest discomfort which was*  
41 *more when I work. I had no choice but to smoke again.”(Participant 51)*

44 Cigarettes were perceived as companions. Many smokers reported that they smoke out of habit or  
45 feeling bored or lonely.

49 *“I smoke back... because ... of addiction... feel like taking cigarette. It is a habit, for example after*  
50 *a meal, it is a habit to smoke cigarette... After breakfast, one sticks, after coffee... Drink, yes...  
51 and after lunch ...” (Participant 37)*

55 *“It’s not because you’re addicted or...like, err, withdrawal symptoms..... also not because of*  
56 *stress ... Err, just like...past time. (chuckle)..... it’s like a hobby la.” (Participant 12)*

1  
2  
3 Psychological dependence clearly highlighted the pleasure they experienced from smoking.  
4  
5 Participants described experiences which were strongly suggestive of psychological addiction to  
6  
7 cigarette smoking, regardless if they realized it or not.  
8

9  
10 *“That actual problem is our mind, the brain ...because why, you know? When we are not smoking,*  
11 *the brain will tell you: ‘There are other smokers there, could you ask him for one cigarette?’*  
12  
13 *(Participant 37)*  
14

15  
16 *“..... because for smoker you feel that something is missing. So, you tend to ask for a stick. Ask*  
17 *for a stick, you know. Then from then starts again. Two sticks..... ” (Participant 41)*  
18  
19

### 20 Theme 3: Socio-cultural Norms

21  
22 Some participants expressed that the offering of cigarettes from friends and relatives was the main  
23  
24 reason for failure to quit. It was a local culture for smokers to offer their friends and relatives cigarettes  
25  
26 as a sign of goodwill and a close relationship.

27  
28 *“My friends.... They offer and we don't refuse it. We take it as a token of friendship.” (Participant*  
29  
30 *43)*  
31

32  
33 Moreover, our participants were persuaded by their close contacts to smoke even though they had  
34  
35 initially expressed their intention to quit smoking. The contacts gave them the impression that  
36  
37 smoking a small amount of cigarettes would not affect their ability to quit smoking. As a result,  
38  
39 participants reverted to smoke cigarettes.

40  
41 *“I actually managed to quit – roughly 3 months. After that, I went for a course in Bangi for a week.*  
42 *There, I had colleagues who smoke, they offered me. I said I didn't want because I've quitted.*  
43 *And they said, “Never mind, only one.... So he gave me, and I smoked. After that, after lunch, he*  
44 *offered me again.” (Participant 9)*  
45  
46  
47  
48

49  
50 For Muslim participants, the withdrawal of social and religious motivation after Ramadan increased  
51  
52 the tendency to relapse.

53  
54 *“The month of “puasa” (fasting month), I was free for the 1 month. Don't want lah, I don't*  
55 *want to smoke in front of my family. Then, when it is during iftar, smoking will waste a lot of*  
56 *time. So, I let myself relax for 1 month. I wanted to rest during fasting month. For my lungs to*  
57  
58  
59  
60

1  
2  
3 *cleanse it.....After fasting month, I started back but less (cigarette). Sometimes 3-4*  
4  
5 *sticks, 5-6 sticks.” (Participant 23)*  
6  
7

#### 8 Theme 4: Misconception

9

10 Smoking cessation is a complex and dynamic process in that most smokers make multiple stages  
11 among smoking, reduction, and abstinence.<sup>17</sup>Some participants perceived quit smoking as just a  
12 game of the mind.  
13

14  
15 *“..... to quit smoking depends on will power. For me, this is a game of the mind. We set our*  
16 *mind, tomorrow, I don't want to smoke tomorrow, then I will not smoke tomorrow.” (Participant 23)*  
17  
18 *“I smoke for “saja” (for fun), not because of addiction. But if it is due to emotional problems, up*  
19 *to here (point to his head) then there are a lot of problems not solved, and the feeling is up to*  
20 *here (point to head), this is another experience, then there will be just cigarette only. When the*  
21 *mind is not calm, nah..... finish one stick then another again and again.” (Participant 17)*  
22  
23  
24  
25  
26

27 Patients often trust their treating doctors and therefore take their doctors' words to heart. This would  
28 undoubtedly include tips, advice, beliefs and misconceptions.  
29

30  
31  
32 *“I stopped abruptly, so I felt breathless. Then my family brought me to the hospital ..... Then*  
33 *the doctor scolded me, “Did you want to die? You cannot stop (smoking) completely all of a*  
34 *sudden. If you want to stop, you need to come to the hospital and meet the MO (medical*  
35 *officer), the doctor, to get their advice. .... At least you have to smoke one a day.”*  
36  
37  
38  
39 *(Participant 9)*  
40  
41

42 Some participants exaggerated or misinterpreted the effects of smoking cessation as harmful to  
43 health.  
44

45  
46 *“I stopped for a few months then I became frightened. My friends said once stopped, disease will*  
47 *come, also I saw my friend (who) died after stopping (smoking).” (Participant 11)*  
48  
49

50  
51 *“There are side effects when stop smoking, after I stopped smoking, I was diagnosed with high*  
52 *blood pressure and had a heart attack as well.” (Participant 28)*  
53  
54

55 One participant who believed that second-hand smoke was more harmful.  
56

57 *“If I breathe in second hand smoke, it is more poisonous than if I smoke myself.” (Participant 1)*  
58  
59

60 It was interesting to also highlight the belief that smoking might in fact be therapeutic.

1  
2  
3 *"I had that disease (Idiopathic thrombocytopenic purpura) for a long period, I did not know. .... I*  
4 *suffered from gum bleeding during brushing teeth, sometimes spontaneously. So I resumed*  
5 *smoking, once smoking... the gum bleed stops. ....smoking is good."* (Participant 33)  
6  
7

8  
9 One participant commented that hand-rolled tobacco leaves were less hazardous than commercial  
10 cigarettes.  
11

12  
13 *"People said "rokok daun" (tobacco leaves) is better compare to a cigarette. I cannot "tahan"*  
14 *(stand) without smoking...so, after discharged from the hospital, my friend recommended "rokok*  
15 *daun"(tobacco leaves) to me. The smell is there...I tried it and I continue to smoke.....At least,*  
16 *this "rokok daun" is better, and I managed to stop the cigarettes."* (Participant 49)  
17  
18  
19

20  
21 Interestingly, there were participants who developed defense mechanisms themselves to ward off the  
22 concept that smoking is dangerous/unacceptable. This was particularly true when the participants felt  
23 obliged to refrain from smoking in the presence of young children or other family members.  
24  
25

26  
27 *"Sometimes I smoke alone in my own room. But I...I open the windows. My room has air-*  
28 *conditioner but I don't even turn it on..... "I turn on the fan to blow away all the smoke."*  
29  
30  
31 (Participant 6)  
32  
33

#### 34 Theme 5: Failed assisted smoking cessation

35  
36 Some participants tried conventional methods (smoking cessation clinic, nicotine replacement therapy)  
37 and alternative methods in their attempts to quit smoking. Most participants expressed that  
38 pharmacotherapy was ineffective. This perhaps resulted in a negative impression towards the  
39 effectiveness of quit smoking clinics. A range of medications were equally blamed by the participants.  
40  
41  
42

43 *"Smoking cessation clinic does not work. I tried chewing the gum, no use. Not working at all.*  
44 *Whatever medications they gave to stop smoking did not work."* (Participant 16)  
45  
46  
47

48 *"I already bought the type of cigarettes, the "blocked", I am not sure if you have heard that before.*  
49 *The one with 3 cigarettes that is like when you smoke, it has no taste. May be you can quit, but I*  
50 *cannot. I brought from the pharmacy."* (Participant 18)  
51  
52  
53  
54  
55  
56  
57  
58  
59  
60

1  
2  
3 The effectiveness of quit smoking clinics was also affected by non-pharmacological factors. These  
4 included the accessibility of the clinic and the language spoken. Language barriers were highlighted  
5 because there were multiple languages spoken in Malaysia.  
6  
7

8  
9  
10 *"I have been to smoking cessation clinic two times. It is just too troublesome to keep going there."*

11  
12 *(Participant 27)*

13  
14 *"But I have gone there (stop smoking clinic). They were all Malay and my Malay is not very*  
15 *(good).... I did not really understand."* *(Participant 1)*  
16  
17

18  
19 Some participants also noted that they did not know the methods available to quit smoking even  
20 though they were willing to try. Participants implied that medical practitioners did not convey and  
21 educate them methods available to quit smoking.  
22  
23

24  
25 *"Doctors don't teach how to stop. And also nobody help you to stop. Do you think so? So, you don't*  
26 *know the way to stop."* *(Participant 24)*  
27  
28  
29

### 30 31 32 **A descriptive model from grounded theory**

33  
34  
35 Figure 1 presents a descriptive model showing the relationship amongst the five grounded theory  
36 themes of participants' perceived reasons for failed quit smoking attempts. Notes accompanying the  
37 diagram in figure 1 provided examples of each grounded theory theme.  
38  
39

40  
41  
42  
43  
44  
45  
46  
47  
48  
49  
50  
51  
52  
53  
54  
55  
56  
57  
58  
59  
60  
Insert figure 1 here

The five themes are displayed as five concentric circles to show the relationship of the themes to one another. Theme 1 (Lifestyle & Social Factors) describes the participants perceived the need to "avoid presence of smokers, easy access to cigarettes, impaired self-control, and boredom" in order to avoid nicotine addiction (theme 2). Theme 3 (Social & Cultural Norms) which includes "offering and accepting cigarettes as token of friendship" have had great relapse consequences on abstinent smokers. Theme 4 (Misconception) relates smokers' lived experiences on why they continue to smoke. Some smokers perceive smoking as a "game of the mind" and they can quit anytime they wish to do so; others continue to smoke because of the misconception that stopping smoking will be harmful to health. Theme 5 (Failed Assisted Smoking Method) describes failures in the healthcare delivery system as perceived by smokers. Participants interviewed in this study had negative

1  
2  
3 experiences of the smoking cessation services received, such as “limited accessibility”, “language  
4 barrier” and “Do not know how the methods work”  
5  
6  
7  
8

### 9 **Time frames for overcoming barriers to smoking cessation**

10 From this grounded theory, a time frame was recommended for changes to overcome each category  
11 of barriers, namely the short term (less than 12 months), the medium term (one to three years), and  
12 the long term (longer than three years). (Figure 1) The duration of these time frames are based on the  
13 current definitions taken from definitions of terms from Wikipedia.<sup>18</sup>  
14  
15  
16  
17  
18  
19  
20

## 21 **DISCUSSION**

### 22 **1. What is known?**

23 Smoking cessation is a challenging human endeavour both for patients and doctor alike. Despite  
24 many decades of trying, mankind is still unable to improve cessation rates very much. Nevertheless,  
25 globally we are all still trying. A 2014 systematic review of qualitative and quantitative literature by  
26 Twyman et al<sup>19</sup> on six vulnerable groups (low socioeconomic; indigenous; mental illness; homeless;  
27 prisoners and at risk youths) described 3 common cessation barriers. These were: smoking for stress  
28 management, lack of social support from health and other service providers, and a high prevalence  
29 and acceptance of smoking in vulnerable communities.  
30  
31  
32  
33  
34  
35  
36  
37  
38

### 39 **2. What is new?**

40 Our study adds on to what is known from Twyman et al's<sup>19</sup> review. New grounds are covered namely;  
41 our participants were community based participants. Demographically, the mean age group (SD) was  
42 58 (10.8). In addition, our participants were represented by the 3 major races in Malaysia. A grounded  
43 theory design was used. The uniqueness of this study design was the data, namely lived experience  
44 of barriers to smoking cessation, which formed the theory that explained the barriers to smoking  
45 cessation.  
46  
47  
48  
49  
50  
51  
52  
53

### 54 **3. Lessons learnt**

55 **Theme 3:** Offering cigarettes one to another is perceived as a sign of friendship and this cigarette  
56 culture practice serves as an impediment to quit smoking in this society. In China, offering cigarettes  
57 is a sign of mutual respect during social events.<sup>20,21</sup> It is customary for a subordinate to light up for his  
58  
59  
60

1  
2  
3 boss.<sup>21</sup> Smokers in our community need to be taught methods of rejecting the offer of cigarettes as  
4  
5 reassurance that declining an offer of a cigarette is not rude.  
6

7 **Theme 3:** Smokers find it easy to stop smoking during Ramadan due to the religion, cultural and  
8  
9 environmental influences.<sup>22</sup> Although many Muslim smokers (97.7%<sup>23</sup>) in Malaysia smoke fewer  
10  
11 number of cigarettes during Ramadan, but only 15 % perceive Ramadan as a strong motivator to quit  
12  
13 smoking<sup>24</sup> and therefore most relapse after Ramadan. It is also known that such good smoking  
14  
15 behaviour changes during Ramadan is associated with those with higher income, high nicotine  
16  
17 dependence and those who are not aware that smoking is 'haram'.<sup>22</sup> Such golden opportunity should  
18  
19 be seized through the implementation of religious-competent intervention to improve cessation rate.  
20

21  
22 **Theme 4:** Our participants revealed a number of misconceptions which were considered to be rather  
23  
24 different from those listed in the literature.<sup>25</sup> For example, misinformation and misconceptions led  
25  
26 them to believe that reduction in tobacco consumption is acceptable, but if they were to quit smoking  
27  
28 entirely, it will cause disease. Second hand smoking is perceived to be more harmful than active  
29  
30 smoking, and therefore they believe that in a smoking environment, active smoking is encouraged. In  
31  
32 addition, false beliefs that smoking may be therapeutic or smoking with the fan on or hand-rolled  
33  
34 cigarettes are less hazardous is present in this community. Some of these serious erroneous believe  
35  
36 reflect low levels of knowledge. Therefore, clinicians should first assess and dispel the relevant false  
37  
38 beliefs during counseling sessions.

39 Theme 1 and Theme 2 interactively: To healthcare practitioners, tobacco smoking is regarded as an  
40  
41 addiction disease. However, to patients, it is regarded as self-determined lifestyle choice.<sup>26</sup> Such  
42  
43 discrepancy was observed in this study. It has long been established that nicotine addiction is the  
44  
45 biggest cause of failure in smoking cessation. Nicotine can be as addictive as heroin, cocaine, or  
46  
47 alcohol.<sup>27, 28</sup> As a result, attempts to quit smoking are often unsuccessful because of withdrawal,  
48  
49 stress, and weight gain.<sup>29</sup> Nevertheless, our participants did not perceive addiction as the major factor  
50  
51 of failure, instead they expressed overwhelmingly that quitting smoking is a "game of the mind."  
52  
53 Smokers blamed themselves as having poor determination in that stop smoking is a matter of how  
54  
55 they control their mind. This finding is consistent with that of a recent quantitative study<sup>30</sup> which  
56  
57 showed that most smokers believe willpower is necessary or sufficient for quitting. Such belief in mind  
58  
59 control as the tool to quit smoking undermines the use of cessation assistance. The failure to be able  
60  
to recognise symptoms of addiction of smoking renders smokers to "not believe" in the usefulness of



1  
2  
3 pharmacotherapy.<sup>31</sup> The use of smoking cessation strategies in our setting has been low<sup>32</sup> and we  
4 believe such misconception is an important contributory factor. Participants were reluctant to receive  
5 professional help and preferred to “quit” by themselves. A national survey in 2016 in Malaysia  
6 revealed that nearly 80% of former smokers quit without any professional intervention.<sup>32</sup> More work is  
7 needed to get smokers to accept that cigarette smoking is highly addictive and nicotine addiction is  
8 very difficult to strike off. In addition, health care practitioners need to ensure sufficient patient  
9 knowledge to improve their confidence to acknowledge withdrawal symptoms and to focus more on  
10 the solution during the cessation process.

#### 11 12 13 14 15 16 17 18 19 **4. Limitations**

20 This study was based on data from in-depth interviews. No focus groups were done in this study and  
21 hence the opportunity to observe the interaction among the participants was lost.  
22  
23  
24  
25  
26

#### 27 **5. Recommendations**

28 We have provided suggestions for applications based on the grounded theory findings in the  
29 discussion above. We can use similar grounded theory design to explore theme 2 and theme 5 with  
30 the view of defining the extent of ignorance in the symptoms of nicotine addiction; misconceptions;  
31 and patient concerns on service provision deficiencies and lack of user-friendliness. With all these  
32 efforts, hopefully, we could create better smoking cessation rates.  
33  
34  
35  
36  
37  
38  
39  
40

## 41 **CONCLUSION**

42 Five categories of specific beliefs and practices prevented smokers from quitting. Clinicians need to  
43 work on these identified factors to help patients overcome barriers to smoking cessation guided by the  
44 time frames recommended by the authors.  
45  
46  
47  
48

#### 49 **Acknowledgement**

50 We thank all the participants in this study. We are grateful for their involvement and effort.  
51  
52  
53  
54  
55

#### 56 **Authors Contribution**

57 KYC conceived the idea. KYC and LGG contributed to the design of the study. KYC, KWL, CCT,  
58 XLC, KCT and STO conducted the individual focus interview, translated and transcribed  
59  
60

1  
2  
3 independently. KYC, KWL, CCT, XLC, KYC, STO carried out thematic analysis as a group and  
4 drafted the original manuscript. KYC and LGG critically revised the manuscript. All authors provided  
5 approval of the final manuscript.  
6  
7

8  
9 **Funding** The authors received no funding for this work.

10  
11 **Competing interests** None declared.  
12

13 **Ethics approval** This study registered and approved by Medical Research Ethics Committee of the  
14 Ministry of Health Malaysia (Ethics approval NMRR-16-2113-33134).  
15

16  
17 **Provenance and peer review** Not commissioned; externally peer reviewed.  
18

19 **Data sharing statement** All requests should be directed to the corresponding author.  
20  
21  
22  
23  
24  
25  
26  
27  
28  
29  
30  
31  
32  
33  
34  
35  
36  
37  
38  
39  
40  
41  
42  
43  
44  
45  
46  
47  
48  
49  
50  
51  
52  
53  
54  
55  
56  
57  
58  
59  
60

1  
2  
3 **Figure legends**  
4  
5

6 Figure 1. A Grounded theory of barriers to smoking cessation  
7  
8  
9  
10  
11  
12  
13  
14  
15  
16  
17  
18  
19  
20  
21  
22  
23  
24  
25  
26  
27  
28  
29  
30  
31  
32  
33  
34  
35  
36  
37  
38  
39  
40  
41  
42  
43  
44  
45  
46  
47  
48  
49  
50  
51  
52  
53  
54  
55  
56  
57  
58  
59  
60

For peer review only

## REFERENCES

1. Foll BL, Pushparaj A, Pryslawsky Y, et al. Translational strategies for therapeutic development in nicotine addiction: Rethinking the conventional bench to bedside approach. *Prog Neuropsychopharmacol Biol Psychiatry* 2014;52:86-93. doi: 10.1016/j.pnpbp.2013.10.009
2. World Health Organisation. Tobacco: World Health Organisation; [updated May 2017. Available from: <http://www.who.int/mediacentre/factsheets/fs339/en/> accessed January 20, 2018.
3. Borland R, Li L, Driezen P, et al. Cessation assistance reported by smokers in 15 countries participating in the International Tobacco Control (ITC) policy evaluation surveys. *Addiction* 2012;107(1):197-205. doi: 10.1111/j.1360-0443.2011.03636.x [published Online First: 2011/09/03]
4. Chaiton M, Diemert L, Cohen JE, et al. Estimating the number of quit attempts it takes to quit smoking successfully in a longitudinal cohort of smokers. *BMJ Open* 2016;6(6):e011045. doi: 10.1136/bmjopen-2016-011045 [published Online First: 2016/06/12]
5. Hughes JR, Keely J, Naud S. Shape of the relapse curve and long-term abstinence among untreated smokers. *Addiction* 2004;99(1):29-38. [published Online First: 2003/12/18]
6. Tobacco Use and Dependence Guideline Panel. Treating Tobacco Use and Dependence: 2008 Update. 6, Evidence and Recommendations. : Rockville (MD): US Department of Health and Human Services. Available from: <https://www.ncbi.nlm.nih.gov/books/NBK63943>.
7. Institute for Public Health (IPH) 2015. National Health and Morbidity Survey 2015 (NHMS 2015). Vol. II: Non-Communicable Diseases, Risk Factors & Other Health Problems;: Ministry of Health Malaysia, 2015.
8. Berkwitz M, Inui TS. Making Use of Qualitative Research Techniques. *J Gen Intern Med* 1998;13(3):195-99. doi: 10.1046/j.1525-1497.1998.00054.x
9. Stewart M. Reflections on the doctor–patient relationship: from evidence and experience. *British Journal of General Practice* 2005;55(519):793-801.
10. Ministry of Health Maldives. National Tobacco Cessation Toolkit (5A & 5Rs) for all doctors and health professionals: Tobacco Prevention & Control Program, Health Promotion and Chronic Disease Control Division of Health Protection Agency, and Tobacco Cessation Clinic, DhamaNaveshi, Male', Ministry of Health, Maldives; 29th August 2016 [Available from: <http://www.searo.who.int/maldives/documents/tobacco-cessation-toolkit.pdf?ua=1> accessed 27 June 2018 2018.
11. Samik-Ibrahim RM. Grounded Theory Methodology as the Research Strategy for a Developing Country. *2000* 2000;1(1) doi: 10.17169/fqs-1.1.1129 [published Online First: 2000-01-31]
12. Strauss A, Corbin J. Chapter 7 : Grounded Theory Methodology: An Overview. In: Denzin NK, Lincoln YS, eds. Strategies of qualitative inquiry. Thousand Oaks, Calif: Sage Publications 1998:158-83.
13. Ritchie J, Lewis, J., & Elam, G. (2003). Designing and selecting samples. In J. Ritchie & J. Lewis (Eds.) Qualitative research practice : a guide for social science students and researchers: London: Sage 2003:pp. 77–108. .
14. Heatherton TF, Kozlowski LT, Frecker RC, et al. The Fagerstrom Test for Nicotine Dependence: A revision of the Fagerstrom Tolerance Questionnaire. *Br J Addict* 1991;86(9):1119-27. [published Online First: 1991/09/01]
15. Glaser BG. Theoretical sensitivity: advances in the methodology of grounded theory. Mill Valley, Calif.: Sociology Press 1978.
16. Nagle B. Qualitative Data Tool: Using QDA Miner Lite Association For Institutional Research. Data and Decisions for Higher Education; [Available from: <https://www.airweb.org/eAIR/techtips/Pages/QDA-Miner-Lite.aspx> accessed January 27 2018.
17. Hughes JR, Solomon LJ, Naud S, et al. Natural History of Attempts to Stop Smoking. *Nicotine & Tobacco Research* 2014;16(9):1190-98. doi: 10.1093/ntr/ntu052

18. Wikipedia. Term (time) [updated 18 March 2017. Available from: [https://en.wikipedia.org/wiki/Term\\_\(time\)](https://en.wikipedia.org/wiki/Term_(time)) accessed 12 November 2018.
19. Twyman L, Bonevski B, Paul C, et al. Perceived barriers to smoking cessation in selected vulnerable groups: a systematic review of the qualitative and quantitative literature. *BMJ Open* 2014;4(12) doi: 10.1136/bmjopen-2014-006414
20. Wang J, Li C, Jia C, et al. Smoking, smoking cessation and tobacco control in rural China: a qualitative study in Shandong Province. *BMC Public Health* 2014;14:916. doi: 10.1186/1471-2458-14-916
21. China Daily. China's cigarette culture 2014 [updated Updated: 2014-01-09 16:52. Available from: [http://www.chinadaily.com.cn/china/2014-01/09/content\\_17226897.htm](http://www.chinadaily.com.cn/china/2014-01/09/content_17226897.htm) accessed June 30 2018.
22. Ismail S, Mohd Zulkefli NA, Chung CS, et al. Factors influencing smoking behaviour changes during Ramadan among Malay male students. *Journal of Fasting and Health* 2015;3(3):97-102. doi: 10.22038/jfh.2015.4738
23. Abu Bakar AM JL, Nasir AM, Anselm ST, Chan WH, Rahman NA, Ibrahim N, Nirmala BP, Omar NM. Religious belief in relation to smoking: a cross-sectional study among Muslim males in the month of Ramadan. *Malaysian J Med Health Sci* 2002;2(2):32-35.
24. Yong H-H, Hamann SL, Borland R, et al. Adult smokers' perception of the role of religion and religious leadership on smoking and association with quitting: A comparison between Thai Buddhists and Malaysian Muslims. *Social science & medicine (1982)* 2009;69(7):1025-31. doi: 10.1016/j.socscimed.2009.07.042
25. Frieden TR, Blakeman DE. The Dirty Dozen: 12 Myths That Undermine Tobacco Control. *Am J Public Health* 2005;95(9):1500-05. doi: 10.2105/AJPH.2005.063073
26. Breitling LP, Rothenbacher D, Stegmaier C, et al. Older Smokers' Motivation and Attempts to Quit Smoking: Epidemiological Insight into the Question of Lifestyle Versus Addiction. *Deutsches Ärzteblatt International* 2009;106(27):451-55. doi: 10.3238/arztebl.2009.0451
27. Stolerman IP, Jarvis MJ. The scientific case that nicotine is addictive. *Psychopharmacology (Berl)* 1995;117(1):2-10; discussion 14-20. [published Online First: 1995/01/01]
28. Henningfield JE, Cohen C, Slade JD. Is nicotine more addictive than cocaine? *Br J Addict* 1991;86(5):565-9. [published Online First: 1991/05/01]
29. Cohen C, Pickworth WB, Henningfield JE. Cigarette smoking and addiction. *Clin Chest Med* 1991;12(4):701-10. [published Online First: 1991/12/01]
30. Hughes JR, Naud S. Perceived role of motivation and self-efficacy in smoking cessation: A secondary data analysis. *Addict Behav* 2016;61:58-61. doi: <https://doi.org/10.1016/j.addbeh.2016.05.010>
31. Morphett K, Partridge B, Gartner C, et al. Why Don't Smokers Want Help to Quit? A Qualitative Study of Smokers' Attitudes towards Assisted vs. Unassisted Quitting. *International Journal of Environmental Research and Public Health* 2015;12(6):6591-607. doi: 10.3390/ijerph120606591
32. Ministry of Health Malaysia Academy of Pharmacy Malaysia. CLINICAL PRACTICE GUIDELINES ON TREATMENT OF TOBACCO USE DISORDER Putrajaya, Malaysia: Tobacco Control Unit & FCTC Secretariat; 2017 [Available from: [http://www.moh.gov.my/penerbitan/CPG2017/Respiratory/CPG\\_TobacoDisorder.pdf](http://www.moh.gov.my/penerbitan/CPG2017/Respiratory/CPG_TobacoDisorder.pdf) accessed February 6 2018.

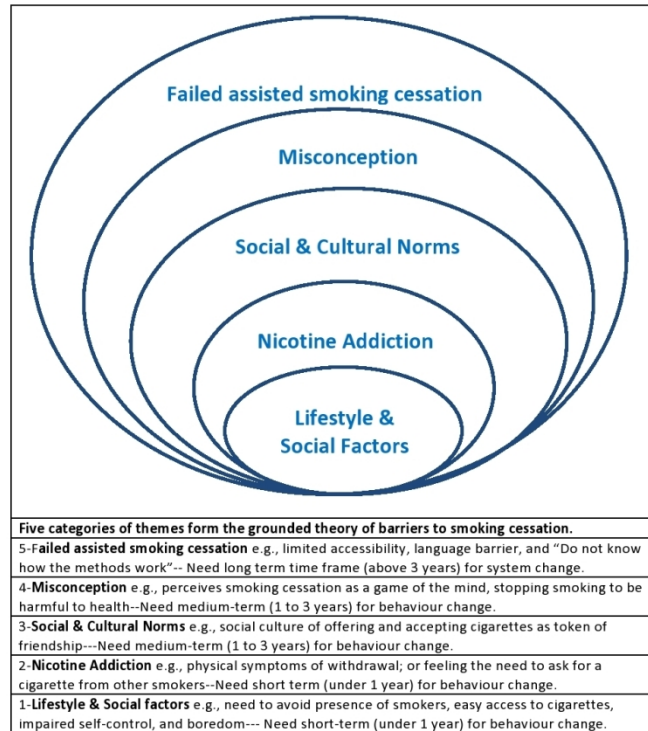

104x148mm (300 x 300 DPI)

## COREQ (CONsolidated criteria for REporting Qualitative research) Checklist

A checklist of items that should be included in reports of qualitative research. You must report the page number in your manuscript where you consider each of the items listed in this checklist. If you have not included this information, either revise your manuscript accordingly before submitting or note N/A.

| Topic                                          | Item No. | Guide Questions/Description                                                                                                                              | Reported on Page No. |
|------------------------------------------------|----------|----------------------------------------------------------------------------------------------------------------------------------------------------------|----------------------|
| <b>Domain 1: Research team and reflexivity</b> |          |                                                                                                                                                          |                      |
| <i>Personal characteristics</i>                |          |                                                                                                                                                          |                      |
| Interviewer/facilitator                        | 1        | Which author/s conducted the interview or focus group?                                                                                                   |                      |
| Credentials                                    | 2        | What were the researcher's credentials? E.g. PhD, MD                                                                                                     |                      |
| Occupation                                     | 3        | What was their occupation at the time of the study?                                                                                                      |                      |
| Gender                                         | 4        | Was the researcher male or female?                                                                                                                       |                      |
| Experience and training                        | 5        | What experience or training did the researcher have?                                                                                                     |                      |
| <i>Relationship with participants</i>          |          |                                                                                                                                                          |                      |
| Relationship established                       | 6        | Was a relationship established prior to study commencement?                                                                                              |                      |
| Participant knowledge of the interviewer       | 7        | What did the participants know about the researcher? e.g. personal goals, reasons for doing the research                                                 |                      |
| Interviewer characteristics                    | 8        | What characteristics were reported about the interviewer/facilitator? e.g. Bias, assumptions, reasons and interests in the research topic                |                      |
| <b>Domain 2: Study design</b>                  |          |                                                                                                                                                          |                      |
| <i>Theoretical framework</i>                   |          |                                                                                                                                                          |                      |
| Methodological orientation and Theory          | 9        | What methodological orientation was stated to underpin the study? e.g. grounded theory, discourse analysis, ethnography, phenomenology, content analysis |                      |
| <i>Participant selection</i>                   |          |                                                                                                                                                          |                      |
| Sampling                                       | 10       | How were participants selected? e.g. purposive, convenience, consecutive, snowball                                                                       |                      |
| Method of approach                             | 11       | How were participants approached? e.g. face-to-face, telephone, mail, email                                                                              |                      |
| Sample size                                    | 12       | How many participants were in the study?                                                                                                                 |                      |
| Non-participation                              | 13       | How many people refused to participate or dropped out? Reasons?                                                                                          |                      |
| <i>Setting</i>                                 |          |                                                                                                                                                          |                      |
| Setting of data collection                     | 14       | Where was the data collected? e.g. home, clinic, workplace                                                                                               |                      |
| Presence of non-participants                   | 15       | Was anyone else present besides the participants and researchers?                                                                                        |                      |
| Description of sample                          | 16       | What are the important characteristics of the sample? e.g. demographic data, date                                                                        |                      |
| <i>Data collection</i>                         |          |                                                                                                                                                          |                      |
| Interview guide                                | 17       | Were questions, prompts, guides provided by the authors? Was it pilot tested?                                                                            |                      |
| Repeat interviews                              | 18       | Were repeat interviews carried out? If yes, how many?                                                                                                    |                      |
| Audio/visual recording                         | 19       | Did the research use audio or visual recording to collect the data?                                                                                      |                      |
| Field notes                                    | 20       | Were field notes made during and/or after the interview or focus group?                                                                                  |                      |
| Duration                                       | 21       | What was the duration of the interviews or focus group?                                                                                                  |                      |
| Data saturation                                | 22       | Was data saturation discussed?                                                                                                                           |                      |
| Transcripts returned                           | 23       | Were transcripts returned to participants for comment and/or                                                                                             |                      |

| Topic                                  | Item No. | Guide Questions/Description                                                                                                        | Reported on Page No. |
|----------------------------------------|----------|------------------------------------------------------------------------------------------------------------------------------------|----------------------|
|                                        |          | correction?                                                                                                                        |                      |
| <b>Domain 3: analysis and findings</b> |          |                                                                                                                                    |                      |
| <i>Data analysis</i>                   |          |                                                                                                                                    |                      |
| Number of data coders                  | 24       | How many data coders coded the data?                                                                                               |                      |
| Description of the coding tree         | 25       | Did authors provide a description of the coding tree?                                                                              |                      |
| Derivation of themes                   | 26       | Were themes identified in advance or derived from the data?                                                                        |                      |
| Software                               | 27       | What software, if applicable, was used to manage the data?                                                                         |                      |
| Participant checking                   | 28       | Did participants provide feedback on the findings?                                                                                 |                      |
| <i>Reporting</i>                       |          |                                                                                                                                    |                      |
| Quotations presented                   | 29       | Were participant quotations presented to illustrate the themes/findings?<br>Was each quotation identified? e.g. participant number |                      |
| Data and findings consistent           | 30       | Was there consistency between the data presented and the findings?                                                                 |                      |
| Clarity of major themes                | 31       | Were major themes clearly presented in the findings?                                                                               |                      |
| Clarity of minor themes                | 32       | Is there a description of diverse cases or discussion of minor themes?                                                             |                      |

Developed from: Tong A, Sainsbury P, Craig J. Consolidated criteria for reporting qualitative research (COREQ): a 32-item checklist for interviews and focus groups. *International Journal for Quality in Health Care*. 2007. Volume 19, Number 6: pp. 349 – 357

**Once you have completed this checklist, please save a copy and upload it as part of your submission. DO NOT include this checklist as part of the main manuscript document. It must be uploaded as a separate file.**



# BMJ Open

## Barriers to Smoking Cessation in Malaysia– A Grounded Theory Study from the Perspective of Primary Care

|                                 |                                                                                                                                                                                                                                                                                                                                                                                                                                  |
|---------------------------------|----------------------------------------------------------------------------------------------------------------------------------------------------------------------------------------------------------------------------------------------------------------------------------------------------------------------------------------------------------------------------------------------------------------------------------|
| Journal:                        | <i>BMJ Open</i>                                                                                                                                                                                                                                                                                                                                                                                                                  |
| Manuscript ID                   | bmjopen-2018-025491.R2                                                                                                                                                                                                                                                                                                                                                                                                           |
| Article Type:                   | Research                                                                                                                                                                                                                                                                                                                                                                                                                         |
| Date Submitted by the Author:   | 18-Jan-2019                                                                                                                                                                                                                                                                                                                                                                                                                      |
| Complete List of Authors:       | Chean, Kooi-Yau; Penang Medical College, Family Medicine<br>Goh, Lee Gan; National University Health System, Family Medicine<br>Liew, Kah-Weng; Penang Medical College, Family Medicine<br>Tan, Chia-Chia; Penang Medical College, Family Medicine<br>Choi, Xin-Ling; Penang Medical College, Family Medicine<br>Tan, Kean-Chye; Penang Medical College, Family Medicine<br>Ooi, Siew-Ting; University of Dublin Trinity College |
| <b>Primary Subject Heading</b>: | Smoking and tobacco                                                                                                                                                                                                                                                                                                                                                                                                              |
| Secondary Subject Heading:      | General practice / Family practice, Addiction, Qualitative research                                                                                                                                                                                                                                                                                                                                                              |
| Keywords:                       | barriers, smoking cessation, grounded theory study, qualitative study, PRIMARY CARE, Malaysia                                                                                                                                                                                                                                                                                                                                    |
|                                 |                                                                                                                                                                                                                                                                                                                                                                                                                                  |

SCHOLARONE™  
Manuscripts

1  
2  
3 **Barriers to Smoking Cessation in Malaysia– A Grounded Theory Study from**  
4 **the Perspective of Primary Care.**  
5  
6  
7

8  
9 **Authors:**

10  
11 CHEAN, Kooi-Yau<sup>1\*</sup>  
12 GOH, Lee-Gan<sup>2</sup>  
13 LIEW, Kah-Weng<sup>1</sup>  
14 TAN, Chia-Chia<sup>1</sup>  
15 CHOI, Xin-Ling<sup>1</sup>  
16 TAN, Kean-Chye<sup>1</sup>  
17 OOI, Siew-Ting<sup>3</sup>  
18  
19  
20  
21

22 **Authors' affiliation(s):**

23  
24 <sup>1</sup>*Department of Family Medicine, Penang Medical College. Penang. 4, Jalan Sepoy Lines.*  
25 *10450 Penang. Malaysia.*  
26

27 <sup>2</sup>*Department of Family Medicine, National University Health System, Singapore. Level 9. Tower*  
28 *Block, 1E, Kent Ridge Road. Singapore*  
29

30 <sup>3</sup>*Trinity College Dublin. School of Medicine. Dublin 2, Ireland.*  
31  
32

33  
34  
35 **Corresponding Author:**

36  
37 Kooi-Yau CHEAN FRNZCGP  
38 Department of Family Medicine,  
39 Penang Medical College.  
40 4, Jalan Sepoy Lines. 10450 Penang. Malaysia.  
41 E mail: [kychean@rcsiucd.edu.my](mailto:kychean@rcsiucd.edu.my)  
42 Tel: +6042171923, +6042171999  
43  
44

45  
46 Word count: 4694

47  
48 Keywords: smoking cessation, qualitative study, Malaysia, barriers, grounded theory,  
49 primary care  
50  
51  
52  
53  
54  
55  
56  
57  
58  
59  
60

## ABSTRACT

**Objectives** This study aims to construct a model of barriers to smoking cessation in the primary care setting.

**Design** Individual in-depth, semi-structured interviews were audiotaped, then verbatim transcribed and translated when necessary. The data was first independently coded and then collectively discussed for emergent themes using the Straussian grounded theory method.

**Participants and Setting** Fifty-seven current smokers were recruited from a previous smoking related study carried out in a primary care setting in Malaysia. Current smokers with at least one failed quit attempt were included.

**Results** A five-theme model emerged from this grounded theory method. (1) Personal and lifestyle factors: Participants were unable to resist the temptation to smoke; (2) Nicotine addiction: Withdrawal symptoms could not be overcome; (3) Social cultural norms: Participants identified accepting cigarettes from friends as a token of friendship to be problematic; (4) Misconception: Perception among smokers that ability to quit was solely based on one's ability to achieve mind control, and perception that stopping smoking will harm the body; and (5) Failed assisted smoking cessation: services were not user friendly and incomprehensible. The themes were organised into 5 concentric circles based on time frame: those actionable in the short term (themes 1 & 2); the medium term (themes 3 & 4); and the long term (theme 5).

**Conclusions** Five categories of specific beliefs and practices prevented smokers from quitting. Clinicians need to work on these factors to help patients overcome barriers to smoking cessation guided by the time frames recommended by the authors.

(242 words)

## ARTICLE SUMMARY

### Strengths and limitations of this study

- As a grounded theory study from the perspective of primary care, this paper contributes to the currently limited literature generated on patients' lived experiences of their quit attempts.
- A diversity of participants from different races and from both high and low nicotine dependence were recruited.
- The use of in-depth qualitative methods allowed detailed account of smokers' experience in smoking cessation.
- No focus group interview was done in this study because of participant reluctance. The opportunity to observe the interaction among participants was unavailable.

## INTRODUCTION

Cigarette smoking harms almost every organ of the body resulting in premature death in half of all smokers<sup>1</sup> and out of the over one billion smokers in the world.<sup>2</sup> Quit smoking can save lives. The prevalence of ever having tried to quit smoking varies in different countries. Less than 20% of smokers in China and Malaysia reported recent attempts to quit.<sup>3</sup> The estimated number of attempts before quitting successfully ranged from 6.1 to 142<sup>4</sup>; the abstinence rate at 6 months is only 3%-5% among those who self-quit<sup>5</sup> and 19%-33% among those who opt for pharmacotherapy.<sup>6</sup> We must therefore take a hard look from a variety of perspectives to understand the reasons contributing to failures in smoking cessation.

Eighty percent of smokers in the world live in developing countries.<sup>2</sup> Hence, studies related to quit smoking behaviours conducted in the relevant cultural and socioeconomic settings of developing countries are needed.

Malaysia is a developing country with a complex society – ethnically, linguistically, culturally and in religious faiths. It has three major races of Malays, Chinese and Indians, and numerous indigenous ethnic groups. Such ethnic and cultural diversity can make smoking cessation a more complicated task for medical practitioners.

Approximately 22.8% of Malaysians smoke.<sup>7</sup> The smoking rate for adult males is 43%<sup>7</sup> and for adult females is 1.4%.<sup>7</sup> The high prevalence of current smokers are associated with males, the Malays, the rural population, government servant and low educational background.<sup>7</sup> By ethnic distribution, the prevalence of smokers was the highest among the Malays, followed by Indians, then Chinese.<sup>7</sup> There are no statistics available for indigenous groups. Over the past 12 months, 52.3% of current smokers in Malaysia made an attempt to quit smoking.<sup>7</sup> Overall, less than 10% of current smokers visited a healthcare provider with 75.4% of them having been advised to quit smoking.<sup>7</sup>

This study aims to explore barriers to quitting smoking from the perspective of primary care. We chose a qualitative study because “a qualitative study is able to capture expressive information about beliefs, values, feelings, and motivations that underlie behaviours”<sup>8</sup> of participants. The process of comparing and exploring smokers’ answers to our open questions can potentially lead us to ‘discover’ new patterns of information regarding barriers to quitting smoking in this unique society. Primary care

1  
2  
3 providers with “whole person medical practice”<sup>9</sup> have the most opportunities to help smokers to quit  
4 smoking. Identifying barriers to quitting is an important step in both the 5As approach (Ask, Advise,  
5 Assess, Assist, and Arrange) and the 5Rs approach(Relevance, Risks, Rewards, Roadblocks, and  
6 Repetition)<sup>10</sup> in brief intervention. Our study will help primary care practitioners in smoking cessation  
7 counseling.  
8  
9  
10  
11

## 12 13 **METHODS**

### 14 **Study design**

15  
16 This study was triggered by the results of a smoking related study of ours. “Assessing Airflow  
17 limitation Among Smokers in a Primary Care Setting” (<https://doi.org/10.21315/mjms2018.25.3.8>). In  
18 that study, the authors found a high prevalence of airflow limitation among smokers and from it  
19 implied urgency in helping smokers to quit smoking. So the triggered research question is what  
20 barriers prevented smoking cessation from take place. Grounded theory study design was chosen as  
21 it will break new ground in understanding barriers to smoking cessation from the primary care  
22 perspective. This study design may be defined as a “general method of comparative analysis”<sup>11</sup>  
23 without pre-existing conceptualization to uncover social processes, a theory can be constructed  
24 through the interaction of the data analysed.<sup>12</sup> Details of data analysis are covered below.  
25  
26  
27  
28  
29  
30  
31  
32  
33  
34  
35

### 36 **Setting and Sample**

37 This study was conducted in Penang, Malaysia between January to February 2017. Participants were  
38 recruited by purposive sampling. This is a “non-probability” and a criterion based sampling  
39 technique.<sup>13</sup> Subjects were selected based on certain characteristics they have, which will enable a  
40 holistic and in-depth exploration of the research topic. From a previous smoking related study in 2016-  
41 2017, the authors had a ready list of 191 participants with at least one failed quit attempt. Their  
42 demographic profile, smoking history and Fagerstrom test for nicotine dependence level were also  
43 available. Eligible participants were contacted by telephone calls to explain the purpose and the  
44 nature of the study. Participants had the option to meet with investigators at Penang Medical College  
45 or their preferred location, including their homes for an interview. Sample size was determined on the  
46 basis of theoretical saturation. Subjects from both high (Fagerstrom score 6-10)<sup>14</sup> and low nicotine  
47 dependence (Fagerstrom score 1-5)<sup>14</sup> were included. Twelve invited smokers refused to participate in  
48 this study. Eight of them did not give any reason and the other four stated that they were too busy.  
49  
50  
51  
52  
53  
54  
55  
56  
57  
58  
59  
60

1  
2  
3 We did not manage to organize any focus group discussion (FGD) as intended because our  
4  
5 participants felt that they were too shy to speak in a group  
6  
7

### 8 **Data collection**

9  
10 Formal informed written consent was obtained from all participants. Fifty-seven one-to-one individual  
11  
12 in-depth interviews (IDI) were conducted. IDIs were done by our team of six interviewers. The team  
13  
14 comprised of two family physicians and lecturers -Tan KC (male) and Chean KY (female) from  
15  
16 Penang Medical College; three medical graduates awaiting internship posting - Liew KW (male), Tan  
17  
18 CC (female) and Choi XL (female) and one medical student - Ooi ST (female) from Ireland. Chean KY  
19  
20 provided training in conducting the interviews for the rest of the team. Two pilot interviews were done.  
21  
22 None of the interviewers were treating doctors or friends of the participants. Techniques used by  
23  
24 interviewers were one to one, open-ended questions, semi-structured format, conversational with  
25  
26 intense probing for deeper meaning and understanding of the responses. Interviewers followed an  
27  
28 interview guide (Table 1) which was consistent with the concept of being 'open' and "discovery"  
29  
30 aiming to construct a particular theory. The initial question asked was open ended to facilitate  
31  
32 participants to describe, to reflect and to express values in their own words. Subsequent questions  
33  
34 were navigated by both participants' response and the pre-determined questions in the guide.  
35  
36 Questions were phrased in a way to get very detailed answers from participants.  
37

38 The interviews were conducted in participants' preferred language which included English, Malay,  
39  
40 Mandarin and Hokkien dialect. The duration of interviews took about 20-60 minutes. The interviews  
41  
42 were audio-recorded and transcribed verbatim. Interviews conducted in non-English languages were  
43  
44 translated.  
45

46 The interviewers met up with the participants once more to verify the accuracy and to correct any  
47  
48 transcription error within 2 weeks of the initial interviews. At the same time, participants were  
49  
50 encouraged to provide additional information if they wish.  
51

52  
53 Table 1: Interview guide

54 Opening question:

55 Please share with us your experience in quitting smoking in the past.

56  
57 Prompts:  
58  
59  
60

1  
2  
3 How many times have you tried/did you try (before you succeeded)? When was it?  
4  
5 How long did you stop for?  
6  
7 How did you stop smoking?  
8  
9 What caused you to resume smoking after stopping?  
10  
11 What makes the process difficult?  
12  
13 What is your reflection on this experience? What did you learn from this experience?  
14  
15 Would you like to say something we haven't talked about and that is important for you?  
16

### 17 18 19 **Data analysis**

20 Data was anonymized and transcribed. The researchers started the analysis with line-by-line open  
21 coding by all six researchers independently to ensure that the analysis was holistic and inductive.  
22  
23 They then met for axial coding and clustering to develop master headings and subsequently higher  
24 categories. The process of analysis was facilitated by the techniques of constant comparison, keeping  
25 one another informed through the use of memos, continual checking and clustering of emerging  
26 themes. Finally, a theoretical model was formulated by linking the fragmented codes.<sup>15</sup> QDA Miner  
27 Lite software<sup>16</sup> was used to assist with code frequency analysis, coding retrieval and Boolean text  
28 search.  
29  
30  
31  
32  
33  
34  
35

### 36 37 **Patient and public involvement**

38 Patients and public were not involved in the design nor the recruitment and conduct of the study. This  
39 study was registered and approved by the Medical Research Ethics Committee of the Ministry of  
40 Health Malaysia (Ethics approval NMRR-16-2113-33134).  
41  
42  
43  
44  
45  
46

## 47 48 **RESULTS**

49 Table 2: Demographic characteristics of participants (n=57)

| 50 Demography Characteristics |            |
|-------------------------------|------------|
| 51 Age, years, mean (SD)      | 58 (10.8)  |
| 52 Range                      | 40-82      |
| 53 Gender, n (%)              |            |
| 54 Male                       | 56 (98%)   |
| 55 Female                     | 1 (2%)     |
| 56 Ethnicity, n (%)           |            |
| 57 Malay                      | 15 (29.4%) |
| 58 Chinese                    | 32 (62.7%) |



|                                                         |            |
|---------------------------------------------------------|------------|
| Indian                                                  | 4 (7.8%)   |
| Education level, n (%)                                  |            |
| Primary education                                       | 21 (36.8%) |
| Lower secondary                                         | 19 (33.3%) |
| Upper secondary                                         | 14 (24.6%) |
| Tertiary                                                | 3 (5.3%)   |
| Fagestrom score, n (%)                                  |            |
| High addiction (8-10)                                   | 8 (14.0%)  |
| Moderate (5-7)                                          | 14 (24.6%) |
| Low to moderate addiction(3-4)                          | 20 (35.1%) |
| Low addiction(0-2)                                      | 15 (26.3%) |
| Marital status, n (%)                                   |            |
| Single                                                  | 10 (17.4%) |
| Married                                                 | 43 (75.4%) |
| Divorced                                                | 3 (0.05%)  |
| Widowed                                                 | 1 (0.02%)  |
| Previous attendance at smoking cessation clinics, n (%) |            |
| Yes                                                     | 19 (33.3%) |
| No                                                      | 38 (66.6%) |

Table 2 shows the demographic characteristics of the fifty- seven participants were interviewed

## Themes generated from grounded theory

### Theme 1: Personal and lifestyle factors

A majority of abstinent participants were unable to resist temptation cues when challenged. Their relapses into smoking were attributed to the influence of friends who smoked in social activities or work places.

*"I felt it was because I mingled with friends who are all smokers. So, if I am the only person who has the plan to stop smoking and mix with friends who are still smoking, that is why... because the cigarette is exposed. I don't have any choice." (Participant 17)*

Participants conceded that relapses in smoking cessation were often related to impaired capacity for self-control and lack of intrinsic motivation.

*"Control... No power of control. Self-control weak, rather weak." (Participant 13)*

Some participants related that the decision to resume smoking was rather impulsive.

*"Yes, it is a mistake. Because I was already not looking for (cigarette) that time, I already was not craving, but just "try, try". After then, it was like learning again, learning again the taste slowly, it was like normal..... tried to discipline ah... eer.. After one week, it was*

1  
2  
3 *very hard, definitely very hard, (I) want to find a cigarette, then (I) must resist, resist the*  
4 *temptation until 2 weeks then it went. By week 3, I feel that even the smells smoke from*  
5 *other smokers make me not comfortable; not because I was craving for a cigarette, but it*  
6 *was because it was like “stinky”. After then, gradually one month, two months, it is ok lah. It*  
7 *is stable. By 3rd month and 4th month like that, definitely I was not looking (for a cigarette).*  
8 *After then, I started to have the urge for a cigarette, so I want to try again, so it was my fault.*  
9 *It was like “play... play” smoke, smoke again, not because of addiction oh.” (Participant 17)*

16 In addition, withdrawal of extrinsic factors that motivated our participants to stop smoking was the  
17 reason for them to resume smoking. A few circumstances had been described. For example, after  
18 sickness, out of prison, out of smoking free zone, no longer taking care for a sick mother or being  
19 nagged.  
20  
21  
22

23  
24 *“I was admitted to ICU (intensive care unit) for 5 times in IJN (National Heart Institute). So I*  
25 *“smoke back” after my bypass, I resumed smoking.” (Participant 28)*

## 29 Theme 2: Nicotine addiction

30 Cigarettes contain nicotine, which is highly addictive. Participants reported overpowering withdrawal  
31 symptoms upon quitting.  
32  
33

34  
35 *“...Stopped 1-2 months, I felt more tired.....If I didn’t smoke, I was not able to open my bowel, I*  
36 *became constipated.....If I smoked at night, I slept better.”(Participant 26)*

37  
38  
39  
40 *“I was feeling difficult, breathless at times. I also noticed that I had chest discomfort which was*  
41 *more when I work. I had no choice but to smoke again.”(Participant 51)*

42  
43  
44 Cigarettes were perceived as companions. Many smokers reported that they smoke out of habit or  
45 feeling bored or lonely.  
46  
47

48  
49 *“I smoke back... because ... of addiction... feel like taking cigarette. It is a habit, for example after*  
50 *a meal, it is a habit to smoke cigarette... After breakfast, one sticks, after coffee... Drink, yes...  
51 and after lunch ...” (Participant 37)*

52  
53  
54  
55 *“It’s not because you’re addicted or...like, err, withdrawal symptoms..... also not because of*  
56 *stress ... Err, just like...past time. (chuckle)..... it’s like a hobby la.” (Participant 12)*  
57  
58  
59  
60

1  
2  
3 Psychological dependence clearly highlighted the pleasure they experienced from smoking.  
4  
5 Participants described experiences which were strongly suggestive of psychological addiction to  
6  
7 cigarette smoking, regardless if they realized it or not.  
8

9  
10 *“That actual problem is our mind, the brain ...because why, you know? When we are not smoking,*  
11 *the brain will tell you: ‘There are other smokers there, could you ask him for one cigarette?’*  
12  
13 *(Participant 37)*  
14

15  
16 *“..... because for smoker you feel that something is missing. So, you tend to ask for a stick. Ask*  
17 *for a stick, you know. Then from then starts again. Two sticks..... ” (Participant 41)*  
18  
19

### 20 Theme 3: Socio-cultural Norms

21  
22 Some participants expressed that the offering of cigarettes from friends and relatives was the main  
23  
24 reason for failure to quit. It was a local culture for smokers to offer their friends and relatives cigarettes  
25  
26 as a sign of goodwill and a close relationship.

27  
28 *“My friends.... They offer and we don't refuse it. We take it as a token of friendship.” (Participant*  
29  
30 *43)*  
31

32  
33 Moreover, our participants were persuaded by their close contacts to smoke even though they had  
34  
35 initially expressed their intention to quit smoking. The contacts gave them the impression that  
36  
37 smoking a small amount of cigarettes would not affect their ability to quit smoking. As a result,  
38  
39 participants reverted to smoke cigarettes.

40  
41 *“I actually managed to quit – roughly 3 months. After that, I went for a course in Bangi for a week.*  
42 *There, I had colleagues who smoke, they offered me. I said I didn't want because I've quitted.*  
43 *And they said, “Never mind, only one.... So he gave me, and I smoked. After that, after lunch, he*  
44 *offered me again.” (Participant 9)*  
45  
46  
47  
48

49  
50 For Muslim participants, the withdrawal of social and religious motivation after Ramadan increased  
51  
52 the tendency to relapse.

53  
54 *“The month of “puasa” (fasting month), I was free for the 1 month. Don't want lah, I don't*  
55 *want to smoke in front of my family. Then, when it is during iftar, smoking will waste a lot of*  
56 *time. So, I let myself relax for 1 month. I wanted to rest during fasting month. For my lungs to*  
57  
58  
59  
60

1  
2  
3 *cleanse it.....After fasting month, I started back but less (cigarette). Sometimes 3-4*  
4  
5 *sticks, 5-6 sticks.” (Participant 23)*  
6  
7

#### 8 Theme 4: Misconception

9

10 Smoking cessation is a complex and dynamic process in that most smokers make multiple stages  
11 among smoking, reduction, and abstinence.<sup>17</sup>Some participants perceived quit smoking as just a  
12 game of the mind.  
13

14  
15 *“..... to quit smoking depends on will power. For me, this is a game of the mind. We set our*  
16 *mind, tomorrow, I don't want to smoke tomorrow, then I will not smoke tomorrow.” (Participant 23)*  
17  
18 *“I smoke for “saja” (for fun), not because of addiction. But if it is due to emotional problems, up*  
19 *to here (point to his head) then there are a lot of problems not solved, and the feeling is up to*  
20 *here (point to head), this is another experience, then there will be just cigarette only. When the*  
21 *mind is not calm, nah..... finish one stick then another again and again.” (Participant 17)*  
22  
23  
24  
25  
26

27 Patients often trust their treating doctors and therefore take their doctors' words to heart. This would  
28 undoubtedly include tips, advice, beliefs and misconceptions.  
29

30  
31  
32 *“I stopped abruptly, so I felt breathless. Then my family brought me to the hospital ..... Then*  
33 *the doctor scolded me, “Did you want to die? You cannot stop (smoking) completely all of a*  
34 *sudden. If you want to stop, you need to come to the hospital and meet the MO (medical*  
35 *officer), the doctor, to get their advice. .... At least you have to smoke one a day.”*  
36  
37  
38  
39 *(Participant 9)*  
40  
41

42 Some participants exaggerated or misinterpreted the effects of smoking cessation as harmful to  
43 health.  
44

45  
46 *“I stopped for a few months then I became frightened. My friends said once stopped, disease will*  
47 *come, also I saw my friend (who) died after stopping (smoking).” (Participant 11)*  
48  
49

50  
51 *“There are side effects when stop smoking, after I stopped smoking, I was diagnosed with high*  
52 *blood pressure and had a heart attack as well.” (Participant 28)*  
53  
54

55 One participant who believed that second-hand smoke was more harmful.  
56

57 *“If I breathe in second hand smoke, it is more poisonous than if I smoke myself.” (Participant 1)*  
58  
59

60 It was interesting to also highlight the belief that smoking might in fact be therapeutic.

1  
2  
3 *"I had that disease (Idiopathic thrombocytopenic purpura) for a long period, I did not know. .... I*  
4 *suffered from gum bleeding during brushing teeth, sometimes spontaneously. So I resumed*  
5 *smoking, once smoking... the gum bleed stops. ....smoking is good."* (Participant 33)  
6  
7

8  
9 One participant commented that hand-rolled tobacco leaves were less hazardous than commercial  
10 cigarettes.  
11

12  
13 *"People said "rokok daun" (tobacco leaves) is better compare to a cigarette. I cannot "tahan"*  
14 *(stand) without smoking...so, after discharged from the hospital, my friend recommended "rokok*  
15 *daun"(tobacco leaves) to me. The smell is there...I tried it and I continue to smoke.....At least,*  
16 *this "rokok daun" is better, and I managed to stop the cigarettes."* (Participant 49)  
17  
18  
19

20  
21 Interestingly, there were participants who developed defense mechanisms themselves to ward off the  
22 concept that smoking is dangerous/unacceptable. This was particularly true when the participants felt  
23 obliged to refrain from smoking in the presence of young children or other family members.  
24  
25

26  
27 *"Sometimes I smoke alone in my own room. But I...I open the windows. My room has air-*  
28 *conditioner but I don't even turn it on..... "I turn on the fan to blow away all the smoke."*  
29  
30  
31 (Participant 6)  
32  
33

#### 34 Theme 5: Failed assisted smoking cessation

35  
36 Some participants tried conventional methods (smoking cessation clinic, nicotine replacement therapy)  
37 and alternative methods in their attempts to quit smoking. Most participants expressed that  
38 pharmacotherapy was ineffective. This perhaps resulted in a negative impression towards the  
39 effectiveness of quit smoking clinics. A range of medications were equally blamed by the participants.  
40  
41  
42

43 *"Smoking cessation clinic does not work. I tried chewing the gum, no use. Not working at all.*  
44 *Whatever medications they gave to stop smoking did not work."* (Participant 16)  
45  
46  
47

48 *"I already bought the type of cigarettes, the "blocked", I am not sure if you have heard that before.*  
49 *The one with 3 cigarettes that is like when you smoke, it has no taste. May be you can quit, but I*  
50 *cannot. I brought from the pharmacy."* (Participant 18)  
51  
52  
53  
54  
55  
56  
57  
58  
59  
60

1  
2  
3 The effectiveness of quit smoking clinics was also affected by non-pharmacological factors. These  
4 included the accessibility of the clinic and the language spoken. Language barriers were highlighted  
5 because there were multiple languages spoken in Malaysia.  
6  
7

8  
9  
10 *"I have been to smoking cessation clinic two times. It is just too troublesome to keep going there."*

11  
12 *(Participant 27)*

13  
14 *"But I have gone there (stop smoking clinic). They were all Malay and my Malay is not very*  
15 *(good).... I did not really understand."* *(Participant 1)*  
16  
17

18  
19 Some participants also noted that they did not know the methods available to quit smoking even  
20 though they were willing to try. Participants implied that medical practitioners did not convey and  
21 educate them methods available to quit smoking.  
22  
23

24  
25 *"Doctors don't teach how to stop. And also nobody help you to stop. Do you think so? So, you don't*  
26 *know the way to stop."* *(Participant 24)*  
27  
28  
29

### 30 31 32 **A descriptive model from grounded theory**

33  
34  
35 Figure 1 presents a descriptive model showing the relationship amongst the five grounded theory  
36 themes of participants' perceived reasons for failed quit smoking attempts. Notes accompanying the  
37 diagram in figure 1 provided examples of each grounded theory theme.  
38  
39

40  
41  
42  
43  
44  
45  
46  
47  
48  
49  
50  
51  
52  
53  
54  
55  
56  
57  
58  
59  
60  
Insert figure 1 here

The five themes are displayed as five concentric circles to show the relationship of the themes to one another. Theme 1 (Lifestyle & Social Factors) describes the participants perceived the need to "avoid presence of smokers, easy access to cigarettes, impaired self-control, and boredom" in order to avoid nicotine addiction (theme 2). Theme 3 (Social & Cultural Norms) which includes "offering and accepting cigarettes as token of friendship" have had great relapse consequences on abstinent smokers. Theme 4 (Misconception) relates smokers' lived experiences on why they continue to smoke. Some smokers perceive smoking as a "game of the mind" and they can quit anytime they wish to do so; others continue to smoke because of the misconception that stopping smoking will be harmful to health. Theme 5 (Failed Assisted Smoking Method) describes failures in the healthcare delivery system as perceived by smokers. Participants interviewed in this study had negative

1  
2  
3 experiences of the smoking cessation services received, such as “limited accessibility”, “language  
4 barrier” and “Do not know how the methods work”  
5  
6  
7  
8

### 9 **Time frames for overcoming barriers to smoking cessation**

10 From this grounded theory, a time frame was recommended for changes to overcome each category  
11 of barriers, namely the short term (less than 12 months), the medium term (one to three years), and  
12 the long term (longer than three years). (Figure 1) The duration of these time frames are based on the  
13 current definitions taken from definitions of terms from Wikipedia.<sup>18</sup>  
14  
15  
16  
17  
18

## 19 **DISCUSSION**

20  
21 Smoking cessation is a challenging human endeavour both for patients and doctor alike. Despite  
22 many decades of trying, mankind is still unable to improve cessation rates very much. Nevertheless,  
23 globally we are all still trying. A 2014 systematic review of qualitative and quantitative literature by  
24 Twyman et al<sup>19</sup> on six vulnerable groups (low socioeconomic; indigenous; mental illness; homeless;  
25 prisoners and at risk youths) described 3 common cessation barriers. These were: smoking for stress  
26 management, lack of social support from health and other service providers, and a high prevalence  
27 and acceptance of smoking in vulnerable communities.  
28  
29

30 Our study adds on to what is known from Twyman et al's<sup>19</sup> review. New grounds are covered namely;  
31 our participants were community based participants. Demographically, the mean age group (SD) was  
32 58 (10.8). In addition, our participants were represented by the 3 major races in Malaysia. A grounded  
33 theory design was used. The uniqueness of this study design was the data, namely lived experience  
34 of barriers to smoking cessation, which formed the theory that explained the barriers to smoking  
35 cessation.  
36  
37  
38  
39  
40  
41  
42  
43  
44  
45  
46  
47  
48  
49

50 There are a few lessons learnt from this study:

51  
52 **a) Theme 3:** Offering cigarettes one to another is perceived as a sign of friendship and this cigarette  
53 culture practice serves as an impediment to quit smoking in this society. In China, offering cigarettes  
54 is a sign of mutual respect during social events.<sup>20,21</sup> It is customary for a subordinate to light up for his  
55  
56  
57  
58  
59  
60

1  
2  
3 boss.<sup>21</sup> Smokers in our community need to be taught methods of rejecting the offer of cigarettes as  
4  
5  
6 reassurance that declining an offer of a cigarette is not rude.

7  
8 b)Theme 3: Smokers find it easy to stop smoking during Ramadan due to the religion, cultural and  
9  
10 environmental influences.<sup>22</sup> Although many Muslim smokers (97.7%<sup>23</sup>) in Malaysia smoke fewer  
11  
12 number of cigarettes during Ramadan, but only 15 % perceive Ramadan as a strong motivator to quit  
13  
14 smoking<sup>24</sup> and therefore most relapse after Ramadan. It is also known that such good smoking  
15  
16 behaviour changes during Ramadan is associated with those with higher income, high nicotine  
17  
18 dependence and those who are not aware that smoking is 'haram'.<sup>22</sup> Such golden opportunity should  
19  
20 be seized through the implementation of religious-competent intervention to improve cessation rate.

21  
22  
23 c)Theme 4: Our participants revealed a number of misconceptions which were considered to be  
24  
25 rather different from those listed in the literature.<sup>25</sup> For example, misinformation and misconceptions  
26  
27 led them to believe that reduction in tobacco consumption is acceptable, but if they were to quit  
28  
29 smoking entirely, it will cause disease. Second hand smoking is perceived to be more harmful than  
30  
31 active smoking, and therefore they believe that in a smoking environment, active smoking is  
32  
33 encouraged. In addition, false beliefs that smoking may be therapeutic or smoking with the fan on or  
34  
35 hand-rolled cigarettes are less hazardous is present in this community. Some of these serious  
36  
37 erroneous believe reflect low levels of knowledge. Therefore, clinicians should first assess and dispel  
38  
39 the relevant false beliefs during counseling sessions.

40  
41 d) Theme 1 and Theme 2 interactively: To healthcare practitioners, tobacco smoking is regarded as  
42  
43 an addiction disease. However, to patients, it is regarded as self-determined lifestyle choice.<sup>26</sup> Such  
44  
45 discrepancy was observed in this study. It has long been established that nicotine addiction is the  
46  
47 biggest cause of failure in smoking cessation. Nicotine can be as addictive as heroin, cocaine, or  
48  
49 alcohol.<sup>27, 28</sup> As a result, attempts to quit smoking are often unsuccessful because of withdrawal,  
50  
51 stress, and weight gain.<sup>29</sup> Nevertheless, our participants did not perceive addiction as the major factor  
52  
53 of failure, instead they expressed overwhelmingly that quitting smoking is a "game of the mind."  
54  
55 Smokers blamed themselves as having poor determination in that stop smoking is a matter of how  
56  
57 they control their mind. This finding is consistent with that of a recent quantitative study<sup>30</sup> which  
58  
59 showed that most smokers believe willpower is necessary or sufficient for quitting. Such belief in mind  
60  
control as the tool to quit smoking undermines the use of cessation assistance. The failure to be able



1  
2  
3 to recognise symptoms of addiction of smoking renders smokers to “not believe” in the usefulness of  
4 pharmacotherapy.<sup>31</sup> The use of smoking cessation strategies in our setting has been low<sup>32</sup> and we  
5 believe such misconception is an important contributory factor. Participants were reluctant to receive  
6 professional help and preferred to “quit” by themselves. A national survey in 2016 in Malaysia  
7 revealed that nearly 80% of former smokers quit without any professional intervention.<sup>32</sup> More work is  
8 needed to get smokers to accept that cigarette smoking is highly addictive and nicotine addiction is  
9 very difficult to strike off. In addition, health care practitioners need to ensure sufficient patient  
10 knowledge to improve their confidence to acknowledge withdrawal symptoms and to focus more on  
11 the solution during the cessation process.  
12  
13  
14  
15  
16  
17  
18  
19

### 20 21 **Limitations**

22  
23 The main limitation of this study is that only in-depth interview and no focus group interviews were  
24 conducted. We did not manage to organize any focus group interview because the participants were  
25 too shy to speak in a group. While the opportunity to observe the interaction among the participants  
26 was lost, we managed to gain a more in-depth, detailed account of smokers' experience without them  
27 feeling inhibited to speak in a group.  
28  
29  
30  
31

32 Another possible limitation is selection bias. The highest grade completed by majority (70.1%) of the  
33 participants was either primary school or lower secondary education and this could have resulted a  
34 “less-educated-population”. Nonetheless, we think the data obtained in our study are sufficiently  
35 robust to describe reasons contributing to failures in smoking cessation in this community.  
36  
37  
38  
39  
40  
41

### 42 **Implications and Recommendations**

43  
44 We have provided suggestions for applications based on the grounded theory findings in the  
45 discussion above. We can use similar grounded theory design to explore theme 2 and theme 5 with  
46 the view of defining the extent of ignorance in the symptoms of nicotine addiction; misconceptions;  
47 and patient concerns on service provision deficiencies and lack of user-friendliness.  
48  
49  
50

51 In addition, the themes of this model serve as a checklist for clinicians when exploring barriers to  
52 smoking cessation. In particular, in step 4 of both the 5A<sup>10</sup> (assist) techniques and 5R<sup>10</sup> (Roadblock)  
53 technique of brief intervention for smoking cessation so that appropriate action plan can be tailored  
54 accordingly. With all these efforts, hopefully, we could create better smoking cessation rates.  
55  
56  
57  
58  
59  
60

## CONCLUSION

Five categories of specific beliefs and practices prevented smokers from quitting. Clinicians need to work on these identified factors to help patients overcome barriers to smoking cessation guided by the time frames recommended by the authors. This study highlighted the importance of socio-cultural environment and misconception as factors contributing to the failure to quit smoking in this community. Educating smokers to dispel their wrong beliefs is crucial. Development of religiously and culturally-competent intervention should be considered to prevent relapse.

## Acknowledgement

We thank all the participants in this study. We are grateful for their involvement and effort.

## Authors Contribution

KYC conceived the idea. KYC and LGG contributed to the design of the study. KYC, KWL, CCT, XLC, KCT and STO conducted the individual focus interview, translated and transcribed independently. KYC, KWL, CCT, XLC, KYC, STO carried out thematic analysis as a group and drafted the original manuscript. KYC and LGG critically revised the manuscript. All authors provided approval of the final manuscript.

**Funding** The authors received no funding for this work.

**Competing interests** None declared.

**Ethics approval** This study registered and approved by Medical Research Ethics Committee of the Ministry of Health Malaysia (Ethics approval NMRR-16-2113-33134).

**Provenance and peer review** Not commissioned; externally peer reviewed.

**Data sharing statement** All requests should be directed to the corresponding author.

1  
2  
3 **Figure legends**  
4  
5

6 Figure 1. A Grounded theory of barriers to smoking cessation  
7  
8  
9  
10  
11  
12  
13  
14  
15  
16  
17  
18  
19  
20  
21  
22  
23  
24  
25  
26  
27  
28  
29  
30  
31  
32  
33  
34  
35  
36  
37  
38  
39  
40  
41  
42  
43  
44  
45  
46  
47  
48  
49  
50  
51  
52  
53  
54  
55  
56  
57  
58  
59  
60

For peer review only

## REFERENCES

1. Foll BL, Pushparaj A, Pryslawsky Y, et al. Translational strategies for therapeutic development in nicotine addiction: Rethinking the conventional bench to bedside approach. *Prog Neuropsychopharmacol Biol Psychiatry* 2014;52:86-93. doi: 10.1016/j.pnpbp.2013.10.009
2. World Health Organisation. Tobacco: World Health Organisation; [updated May 2017. Available from: <http://www.who.int/mediacentre/factsheets/fs339/en/> accessed January 20, 2018.
3. Borland R, Li L, Driezen P, et al. Cessation assistance reported by smokers in 15 countries participating in the International Tobacco Control (ITC) policy evaluation surveys. *Addiction* 2012;107(1):197-205. doi: 10.1111/j.1360-0443.2011.03636.x [published Online First: 2011/09/03]
4. Chaiton M, Diemert L, Cohen JE, et al. Estimating the number of quit attempts it takes to quit smoking successfully in a longitudinal cohort of smokers. *BMJ Open* 2016;6(6):e011045. doi: 10.1136/bmjopen-2016-011045 [published Online First: 2016/06/12]
5. Hughes JR, Keely J, Naud S. Shape of the relapse curve and long-term abstinence among untreated smokers. *Addiction* 2004;99(1):29-38. [published Online First: 2003/12/18]
6. Tobacco Use and Dependence Guideline Panel. Treating Tobacco Use and Dependence: 2008 Update. 6, Evidence and Recommendations. : Rockville (MD): US Department of Health and Human Services. Available from: <https://www.ncbi.nlm.nih.gov/books/NBK63943>.
7. Institute for Public Health (IPH) 2015. National Health and Morbidity Survey 2015 (NHMS 2015). Vol. II: Non-Communicable Diseases, Risk Factors & Other Health Problems;: Ministry of Health Malaysia, 2015.
8. Berkwits M, Inui TS. Making Use of Qualitative Research Techniques. *J Gen Intern Med* 1998;13(3):195-99. doi: 10.1046/j.1525-1497.1998.00054.x
9. Stewart M. Reflections on the doctor–patient relationship: from evidence and experience. *British Journal of General Practice* 2005;55(519):793-801.
10. Ministry of Health Maldives. National Tobacco Cessation Toolkit (5A & 5Rs) for all doctors and health professionals: Tobacco Prevention & Control Program, Health Promotion and Chronic Disease Control Division of Health Protection Agency, and Tobacco Cessation Clinic, Dhamanaveshi, Male', Ministry of Health, Maldives; 29th August 2016 [Available from: <http://www.searo.who.int/maldives/documents/tobacco-cessation-toolkit.pdf?ua=1> accessed 27 June 2018 2018.
11. Samik-Ibrahim RM. Grounded Theory Methodology as the Research Strategy for a Developing Country. *2000* 2000;1(1) doi: 10.17169/fqs-1.1.1129 [published Online First: 2000-01-31]
12. Strauss A, Corbin J. Chapter 7 : Grounded Theory Methodology: An Overview. In: Denzin NK, Lincoln YS, eds. *Strategies of qualitative inquiry*. Thousand Oaks, Calif: Sage Publications 1998:158-83.
13. Ritchie J, Lewis, J., & Elam, G. (2003). Designing and selecting samples. In J. Ritchie & J. Lewis (Eds.) *Qualitative research practice : a guide for social science students and researchers*: London: Sage 2003:pp. 77–108. .
14. Heatherton TF, Kozlowski LT, Frecker RC, et al. The Fagerstrom Test for Nicotine Dependence: A revision of the Fagerstrom Tolerance Questionnaire. *Br J Addict* 1991;86(9):1119-27. [published Online First: 1991/09/01]
15. Glaser BG. *Theoretical sensitivity: advances in the methodology of grounded theory*. Mill Valley, Calif.: Sociology Press 1978.
16. Nagle B. *Qualitative Data Tool: Using QDA Miner Lite Association For Institutional Research*. Data and Decisions for Higher Education; [Available from: <https://www.airweb.org/eAIR/techtips/Pages/QDA-Miner-Lite.aspx> accessed January 27 2018.
17. Hughes JR, Solomon LJ, Naud S, et al. Natural History of Attempts to Stop Smoking. *Nicotine & Tobacco Research* 2014;16(9):1190-98. doi: 10.1093/ntr/ntu052

18. Wikipedia. Term (time) [updated 18 March 2017. Available from: [https://en.wikipedia.org/wiki/Term\\_\(time\)](https://en.wikipedia.org/wiki/Term_(time))] accessed 12 November 2018.
19. Twyman L, Bonevski B, Paul C, et al. Perceived barriers to smoking cessation in selected vulnerable groups: a systematic review of the qualitative and quantitative literature. *BMJ Open* 2014;4(12) doi: 10.1136/bmjopen-2014-006414
20. Wang J, Li C, Jia C, et al. Smoking, smoking cessation and tobacco control in rural China: a qualitative study in Shandong Province. *BMC Public Health* 2014;14:916. doi: 10.1186/1471-2458-14-916
21. China Daily. China's cigarette culture 2014 [updated Updated: 2014-01-09 16:52. Available from: [http://www.chinadaily.com.cn/china/2014-01/09/content\\_17226897.htm](http://www.chinadaily.com.cn/china/2014-01/09/content_17226897.htm)] accessed June 30 2018.
22. Ismail S, Mohd Zulkefli NA, Chung CS, et al. Factors influencing smoking behaviour changes during Ramadan among Malay male students. *Journal of Fasting and Health* 2015;3(3):97-102. doi: 10.22038/jfh.2015.4738
23. Abu Bakar AM JL, Nasir AM, Anselm ST, Chan WH, Rahman NA, Ibrahim N, Nirmala BP, Omar NM. Religious belief in relation to smoking: a cross-sectional study among Muslim males in the month of Ramadan. *Malaysian J Med Health Sci* 2002;2(2):32-35.
24. Yong H-H, Hamann SL, Borland R, et al. Adult smokers' perception of the role of religion and religious leadership on smoking and association with quitting: A comparison between Thai Buddhists and Malaysian Muslims. *Social science & medicine (1982)* 2009;69(7):1025-31. doi: 10.1016/j.socscimed.2009.07.042
25. Frieden TR, Blakeman DE. The Dirty Dozen: 12 Myths That Undermine Tobacco Control. *Am J Public Health* 2005;95(9):1500-05. doi: 10.2105/AJPH.2005.063073
26. Breitling LP, Rothenbacher D, Stegmaier C, et al. Older Smokers' Motivation and Attempts to Quit Smoking: Epidemiological Insight into the Question of Lifestyle Versus Addiction. *Deutsches Ärzteblatt International* 2009;106(27):451-55. doi: 10.3238/arztebl.2009.0451
27. Stolerman IP, Jarvis MJ. The scientific case that nicotine is addictive. *Psychopharmacology (Berl)* 1995;117(1):2-10; discussion 14-20. [published Online First: 1995/01/01]
28. Henningfield JE, Cohen C, Slade JD. Is nicotine more addictive than cocaine? *Br J Addict* 1991;86(5):565-9. [published Online First: 1991/05/01]
29. Cohen C, Pickworth WB, Henningfield JE. Cigarette smoking and addiction. *Clin Chest Med* 1991;12(4):701-10. [published Online First: 1991/12/01]
30. Hughes JR, Naud S. Perceived role of motivation and self-efficacy in smoking cessation: A secondary data analysis. *Addict Behav* 2016;61:58-61. doi: <https://doi.org/10.1016/j.addbeh.2016.05.010>
31. Morphett K, Partridge B, Gartner C, et al. Why Don't Smokers Want Help to Quit? A Qualitative Study of Smokers' Attitudes towards Assisted vs. Unassisted Quitting. *International Journal of Environmental Research and Public Health* 2015;12(6):6591-607. doi: 10.3390/ijerph120606591
32. Ministry of Health Malaysia Academy of Pharmacy Malaysia. CLINICAL PRACTICE GUIDELINES ON TREATMENT OF TOBACCO USE DISORDER Putrajaya, Malaysia: Tobacco Control Unit & FCTC Secretariat; 2017 [Available from: [http://www.moh.gov.my/penerbitan/CPG2017/Respiratory/CPG\\_TobaccoDisorder.pdf](http://www.moh.gov.my/penerbitan/CPG2017/Respiratory/CPG_TobaccoDisorder.pdf)] accessed February 6 2018.



104x148mm (300 x 300 DPI)

## COREQ (CONsolidated criteria for REporting Qualitative research) Checklist

A checklist of items that should be included in reports of qualitative research. You must report the page number in your manuscript where you consider each of the items listed in this checklist. If you have not included this information, either revise your manuscript accordingly before submitting or note N/A.

| Topic                                          | Item No. | Guide Questions/Description                                                                                                                              | Reported on Page No. |
|------------------------------------------------|----------|----------------------------------------------------------------------------------------------------------------------------------------------------------|----------------------|
| <b>Domain 1: Research team and reflexivity</b> |          |                                                                                                                                                          |                      |
| <i>Personal characteristics</i>                |          |                                                                                                                                                          |                      |
| Interviewer/facilitator                        | 1        | Which author/s conducted the interview or focus group?                                                                                                   |                      |
| Credentials                                    | 2        | What were the researcher's credentials? E.g. PhD, MD                                                                                                     |                      |
| Occupation                                     | 3        | What was their occupation at the time of the study?                                                                                                      |                      |
| Gender                                         | 4        | Was the researcher male or female?                                                                                                                       |                      |
| Experience and training                        | 5        | What experience or training did the researcher have?                                                                                                     |                      |
| <i>Relationship with participants</i>          |          |                                                                                                                                                          |                      |
| Relationship established                       | 6        | Was a relationship established prior to study commencement?                                                                                              |                      |
| Participant knowledge of the interviewer       | 7        | What did the participants know about the researcher? e.g. personal goals, reasons for doing the research                                                 |                      |
| Interviewer characteristics                    | 8        | What characteristics were reported about the interviewer/facilitator? e.g. Bias, assumptions, reasons and interests in the research topic                |                      |
| <b>Domain 2: Study design</b>                  |          |                                                                                                                                                          |                      |
| <i>Theoretical framework</i>                   |          |                                                                                                                                                          |                      |
| Methodological orientation and Theory          | 9        | What methodological orientation was stated to underpin the study? e.g. grounded theory, discourse analysis, ethnography, phenomenology, content analysis |                      |
| <i>Participant selection</i>                   |          |                                                                                                                                                          |                      |
| Sampling                                       | 10       | How were participants selected? e.g. purposive, convenience, consecutive, snowball                                                                       |                      |
| Method of approach                             | 11       | How were participants approached? e.g. face-to-face, telephone, mail, email                                                                              |                      |
| Sample size                                    | 12       | How many participants were in the study?                                                                                                                 |                      |
| Non-participation                              | 13       | How many people refused to participate or dropped out? Reasons?                                                                                          |                      |
| <i>Setting</i>                                 |          |                                                                                                                                                          |                      |
| Setting of data collection                     | 14       | Where was the data collected? e.g. home, clinic, workplace                                                                                               |                      |
| Presence of non-participants                   | 15       | Was anyone else present besides the participants and researchers?                                                                                        |                      |
| Description of sample                          | 16       | What are the important characteristics of the sample? e.g. demographic data, date                                                                        |                      |
| <i>Data collection</i>                         |          |                                                                                                                                                          |                      |
| Interview guide                                | 17       | Were questions, prompts, guides provided by the authors? Was it pilot tested?                                                                            |                      |
| Repeat interviews                              | 18       | Were repeat interviews carried out? If yes, how many?                                                                                                    |                      |
| Audio/visual recording                         | 19       | Did the research use audio or visual recording to collect the data?                                                                                      |                      |
| Field notes                                    | 20       | Were field notes made during and/or after the interview or focus group?                                                                                  |                      |
| Duration                                       | 21       | What was the duration of the interviews or focus group?                                                                                                  |                      |
| Data saturation                                | 22       | Was data saturation discussed?                                                                                                                           |                      |
| Transcripts returned                           | 23       | Were transcripts returned to participants for comment and/or                                                                                             |                      |

| Topic                                  | Item No. | Guide Questions/Description                                                                                                        | Reported on Page No. |
|----------------------------------------|----------|------------------------------------------------------------------------------------------------------------------------------------|----------------------|
|                                        |          | correction?                                                                                                                        |                      |
| <b>Domain 3: analysis and findings</b> |          |                                                                                                                                    |                      |
| <i>Data analysis</i>                   |          |                                                                                                                                    |                      |
| Number of data coders                  | 24       | How many data coders coded the data?                                                                                               |                      |
| Description of the coding tree         | 25       | Did authors provide a description of the coding tree?                                                                              |                      |
| Derivation of themes                   | 26       | Were themes identified in advance or derived from the data?                                                                        |                      |
| Software                               | 27       | What software, if applicable, was used to manage the data?                                                                         |                      |
| Participant checking                   | 28       | Did participants provide feedback on the findings?                                                                                 |                      |
| <i>Reporting</i>                       |          |                                                                                                                                    |                      |
| Quotations presented                   | 29       | Were participant quotations presented to illustrate the themes/findings?<br>Was each quotation identified? e.g. participant number |                      |
| Data and findings consistent           | 30       | Was there consistency between the data presented and the findings?                                                                 |                      |
| Clarity of major themes                | 31       | Were major themes clearly presented in the findings?                                                                               |                      |
| Clarity of minor themes                | 32       | Is there a description of diverse cases or discussion of minor themes?                                                             |                      |

Developed from: Tong A, Sainsbury P, Craig J. Consolidated criteria for reporting qualitative research (COREQ): a 32-item checklist for interviews and focus groups. *International Journal for Quality in Health Care*. 2007. Volume 19, Number 6: pp. 349 – 357

**Once you have completed this checklist, please save a copy and upload it as part of your submission. DO NOT include this checklist as part of the main manuscript document. It must be uploaded as a separate file.**



# BMJ Open

## Barriers to Smoking Cessation – A Qualitative Study from the Perspective of Primary Care in Malaysia.

|                                 |                                                                                                                                                                                                                                                                                                                                                                 |
|---------------------------------|-----------------------------------------------------------------------------------------------------------------------------------------------------------------------------------------------------------------------------------------------------------------------------------------------------------------------------------------------------------------|
| Journal:                        | <i>BMJ Open</i>                                                                                                                                                                                                                                                                                                                                                 |
| Manuscript ID                   | bmjopen-2018-025491.R3                                                                                                                                                                                                                                                                                                                                          |
| Article Type:                   | Research                                                                                                                                                                                                                                                                                                                                                        |
| Date Submitted by the Author:   | 17-Apr-2019                                                                                                                                                                                                                                                                                                                                                     |
| Complete List of Authors:       | Chean, Kooi-Yau; RCSI & UCD Malaysia Campus<br>Goh, Lee Gan; National University Health System, Family Medicine<br>Liew, Kah-Weng; RCSI & UCD Malaysia Campus<br>Tan, Chia-Chia; RCSI & UCD Malaysia Campus<br>Choi, Xin-Ling; RCSI & UCD Malaysia Campus<br>Tan, Kean-Chye; RCSI & UCD Malaysia Campus<br>Ooi, Siew-Ting; University of Dublin Trinity College |
| <b>Primary Subject Heading</b>: | Smoking and tobacco                                                                                                                                                                                                                                                                                                                                             |
| Secondary Subject Heading:      | General practice / Family practice, Addiction, Qualitative research                                                                                                                                                                                                                                                                                             |
| Keywords:                       | barriers, qualitative study, PRIMARY CARE, Malaysia, smoking cessation strategies, grounded theory                                                                                                                                                                                                                                                              |
|                                 |                                                                                                                                                                                                                                                                                                                                                                 |

SCHOLARONE™  
Manuscripts

1  
2  
3 1 **Barriers to Smoking Cessation – A Qualitative Study from the Perspective of**  
4 2 **Primary Care in Malaysia.**  
5  
6  
7 3

8  
9 4 **Authors:**

10  
11 5 CHEAN, Kooi-Yau<sup>1\*</sup>

12 6 GOH, Lee-Gan<sup>2</sup>

13 7 LIEW, Kah-Weng<sup>1</sup>

14 8 TAN, Chia-Chia<sup>1</sup>

15 9 CHOI, Xin-Ling<sup>1</sup>

16 10 TAN, Kean-Chye<sup>1</sup>

17 11 OOI, Siew-Ting<sup>3</sup>  
18  
19  
20  
21  
22

23 13 **Authors' affiliation(s):**

24 14 <sup>1</sup>Department of Family Medicine, RCSI&UCD Malaysia Campus. 4, Jalan Sepoy Lines. 10450 Penang.  
25 15 Malaysia.

26 16  
27 17 <sup>2</sup>Department of Family Medicine, National University Health System, Singapore. Level 9. Tower  
28 18 Block, 1E, Kent Ridge Road. Singapore

29 19  
30 20 <sup>3</sup>Trinity College Dublin. School of Medicine. Dublin 2, Ireland.  
31 21  
32 22  
33 23  
34 24

35 24 **Corresponding Author:**

36  
37 25 Kooi-Yau CHEAN FRNZCGP  
38 26 Department of Family Medicine,  
39 27 RCSI & UCD Malaysia Campus.  
40 28 4, Jalan Sepoy Lines. 10450 Penang. Malaysia.  
41 29 E mail: [kychean@rcsiucd.edu.my](mailto:kychean@rcsiucd.edu.my)  
42 30 Tel: +6042171923, +6042171999  
43 31  
44  
45

46 32 **Keywords:** smoking cessation strategies, qualitative study, Malaysia, grounded  
47 33 theory, primary care, barriers.  
48  
49  
50 34  
51  
52  
53  
54  
55  
56  
57  
58  
59  
60

1  
2  
3 **1 ABSTRACT**  
4

5 **2 Objectives** This qualitative study aims to construct a model of the barriers to smoking cessation in  
6  
7 the primary care setting.  
8

9 **4 Design** Individual in-depth, semi-structured interviews were audio taped, then verbatim transcribed  
10  
11 and translated when necessary. The data was first independently coded and then collectively  
12  
13 discussed for emergent themes using the Straussian grounded theory method.  
14

15 **7 Participants and Setting** Fifty-seven current smokers were recruited from a previous smoking  
16  
17 related study carried out in a primary care setting in Malaysia. Current smokers with at least one failed  
18  
19 quit attempts were included.  
20

21 **10 Results** A five-theme model emerged from this grounded theory method. (1) Personal and lifestyle  
22  
23 factors: Participants were unable to resist the temptation to smoke; (2) Nicotine addiction: Withdrawal  
24  
25 symptoms could not be overcome; (3) Social cultural norms: Participants identified accepting  
26  
27 cigarettes from friends as a token of friendship to be problematic; (4) Misconception: Perception  
28  
29 among smokers that ability to quit was solely based on one's ability to achieve mind control, and  
30  
31 perception that stopping smoking will harm the body; and (5) Failed assisted smoking cessation:  
32  
33 Smoking cessation services were not felt to be user-friendly and were poorly understood. The themes  
34  
35 were organised into 5 concentric circles based on time frame: those actionable in the short term  
36  
37 (themes 1 & 2); and the long term (theme 3, 4, 5).  
38

39 **19 Conclusions** Five themes of specific beliefs and practices prevented smokers from quitting. Clinicians  
40  
41 need to work on these barriers, which can be guided by the recommended time frames to help  
42  
43 patients to succeed in smoking cessation.  
44

45 (249 words)  
46  
47  
48  
49  
50  
51  
52  
53  
54  
55  
56  
57  
58  
59  
60

## ARTICLE SUMMARY

### Strengths and limitations of this study

- As a qualitative study from the primary care perspective, this paper contributes to the limited literature available on smokers' lived experiences of their attempts to quit smoking.
- A diversity of participants from different races and from both high and low nicotine dependence were recruited.
- The use of in-depth qualitative methods allowed detailed account of smokers' experience in smoking cessation.
- Focus group interview was not performed in this study because of participant reluctance and hence the opportunity to observe the interaction among participants was unavailable.

## 1 INTRODUCTION

2 Cigarette smoking harms almost every organ of the body resulting in premature death in half of all  
3 smokers<sup>1</sup>, and unfortunately there are over one billion smokers in the world.<sup>2</sup> The prevalence of ever  
4 having tried to quit smoking varies in different countries, for example, less than 20% of smokers in  
5 China and Malaysia reported recent attempts to quit.<sup>3</sup> Additionally, the estimated number of attempts  
6 before quitting successfully varied widely, ranging from 6.1 to 142.<sup>4</sup> In those who tried to quit smoking,  
7 the abstinence rate at 6 months is only 3%-5% among those who self-quit<sup>5</sup> and 19%-33% among  
8 those who opt for pharmacotherapy.<sup>6</sup> We must therefore take an in depth look from a variety of  
9 perspectives to understand the reasons contributing to failures in smoking cessation.

10 Eighty percent of smokers in the world live in developing countries.<sup>2</sup> Hence, studies related to quit  
11 smoking behaviours conducted in the relevant cultural and socioeconomic settings of developing  
12 countries are needed.

13 Malaysia is a developing country with a complex society – ethnically, linguistically, culturally and  
14 religious faiths. It has three major races of Malays, Chinese and Indians, with numerous indigenous  
15 ethnic groups. Such ethnic and cultural diversity may make smoking cessation a more complicated  
16 task for medical practitioners.

17 Approximately 22.8% of Malaysians smoke.<sup>7</sup> The smoking rate for adult males is 43%<sup>7</sup> and for adult  
18 females is 1.4%.<sup>7</sup> The high prevalence of current smokers are associated with males, Malays, the  
19 rural population, government servant and those with low educational background.<sup>7</sup> By ethnic  
20 distribution, the prevalence of smokers was the highest among the Malays, followed by Indians, then  
21 Chinese.<sup>7</sup> There are no statistics available for indigenous groups. Over the past 12 months, 52.3% of  
22 current smokers in Malaysia made an attempt to quit smoking.<sup>7</sup> Overall, less than 10% of current  
23 smokers visited a healthcare provider with 75.4% of them having been advised to quit smoking.<sup>7</sup>

24 This study was triggered by the results of one of our smoking related study, “Assessing Airflow  
25 limitation Among Smokers in a Primary Care Setting” (<https://doi.org/10.21315/mjms2018.25.3.8>). In  
26 that study, the authors found a high prevalence of airflow limitation among smokers and from it  
27 implied urgency in helping smokers to quit smoking. So the triggered research question is what  
28 barriers prevented smoking cessation from take place.

1  
2  
3 1 This study aims to explore barriers to quitting smoking from the perspective of primary care. We  
4  
5 2 chose a qualitative study because “this will be able to capture expressive information about beliefs,  
6  
7 3 values, feelings, and motivations that underlie the behaviour”<sup>8</sup> of participants. The process of  
8  
9 4 comparing and exploring smokers’ answers to our open questions can also potentially lead us to  
10  
11 5 ‘discover’ new patterns of information regarding barriers to quitting smoking in this unique society.  
12  
13 6 Primary care providers with “whole person medical practice”<sup>9</sup> have the most opportunities to help  
14  
15 7 smokers to quit smoking. Identifying barriers to quitting is an important step in both the 5As approach  
16  
17 8 (Ask, Advise, Assess, Assist, and Arrange) and the 5Rs approach(Relevance, Risks, Rewards,  
18  
19 9 Roadblocks, and Repetition)<sup>10</sup> in brief intervention. Our study will help primary care practitioners in  
20  
21 10 smoking cessation counseling.

## 22 23 11 **METHODS**

### 24 25 12 **Study design**

26  
27 13 A grounded theory study method was chosen as this will allow a new understanding of the barriers to  
28  
29 14 smoking cessation from the primary care perspective. This study method may be defined as a  
30  
31 15 “general method of comparative analysis”<sup>11</sup> without pre-existing conceptualization to uncover social  
32  
33 16 processes. A theory is then constructed through the data analysis<sup>12</sup>, which is presented.

### 34 35 36 17 **Setting and Sample**

37  
38 18 This study was conducted in Penang, Malaysia during January and February 2017. We recruited  
39  
40 19 participants using purposive sampling, which is a “non-probability” and a criterion based sampling  
41  
42 20 technique.<sup>13</sup> Subjects were selected based on certain characteristics, which will enable a holistic and  
43  
44 21 in-depth exploration of the research topic. From a previous smoking related study in 2016-2017, the  
45  
46 22 authors had a ready list of 191 participants with at least one failed quit attempts. Their demographic  
47  
48 23 profile, smoking history and Fagerstrom test for nicotine dependence level were also available. We  
49  
50 24 contacted the eligible participants by telephone to explain the purpose and the nature of the study.  
51  
52 25 Participants had the option to meet with investigators at RCSI & UCD Malaysia Campus or an  
53  
54 26 alternative preferred location (including their homes) for an interview. Sample size was determined on  
55  
56 27 the basis of theoretical saturation. Subjects from both high nicotine dependence (Fagerstrom score 6-  
57  
58 28 10)<sup>14</sup> and low nicotine dependence (Fagerstrom score 1-5)<sup>14</sup> were included. Twelve invited smokers  
59  
60 29 refused to participate in the study. Eight of them did not give any reason and four stated that they

1 were too busy. We did not manage to organize any focus group discussion (FGD) as intended  
2 because our participants felt that they were too shy to speak in such a group format. In the smoking  
3 cessation barriers model presented in this paper, we defined short term potential modifiable strategies  
4 as less than 3 months of smoking abstinence<sup>15, 16</sup> and potential long term strategies as 12 months or  
5 longer of smoking abstinence<sup>17, 18</sup> based on study designs reported in the current literature (2015 to  
6 2019) obtained from PubMed searches.

## 7 **Data collection**

8 Informed written consent was obtained from all participants. Fifty-seven one-to-one individual in-depth  
9 interviews (IDI) were conducted by a team of six researchers. The team comprised of two family  
10 physicians and lecturers - KCT (male) and KYC (female) from RCSI & UCD Malaysia Campus; three  
11 medical graduates awaiting internship posting - KWL (male), CCT (female) and XLC (female) and one  
12 medical student - STO (female) from Ireland. KYC conducted two pilot interviews and provided  
13 training in conducting the interviews for the rest of the team. None of the interviewers were known to  
14 the participants. The technique used by interviewers was one to one, open-ended questions,  
15 semi-structured format, conversational with intense probing for deeper meaning and understanding of  
16 the responses. Interviewers followed an interview guide (Table 1) which was consistent with the  
17 concept of being 'open' and "discovery" aiming to construct a particular theory. The initial question  
18 asked was open ended to facilitate participants to describe, to reflect and to express values in their  
19 own words. Subsequent questions were determined by both the participants' response and the pre-  
20 determined questions in the interview guide (Table 1). Questions were phrased in a way to get  
21 lengthy, detailed answers from participants.

22 The interviews were conducted in participants' preferred language which included English, Malay,  
23 Mandarin and Hokkien dialect. The duration of interviews took between 20 and 60 minutes. The  
24 interviews were audio-recorded and transcribed verbatim. Non-English interviews were translated to  
25 English by the respective interviewers.

26 The interviewers met up with the participants within two weeks of the interviews to verify the accuracy  
27 and to correct any transcription errors. At the second encounter, participants were encouraged to  
28 provide additional information if they wished.

## 1 Table 1. Interview guide

Opening question:

Please share with us your experience in quitting smoking in the past.

Prompts:

How many times have you tried/did you try (before you succeeded)? When was it?

How long did you stop for?

How did you stop smoking?

What caused you to resume smoking after stopping?

What makes the process difficult?

What is your reflection on this experience? What did you learn from this experience?

Would you like to say something we haven't talked about and that is important for you?

2

3 **Data analysis**

4 Data was anonymized and transcribed. All six researchers started line-by-line open coding  
 5 independently to ensure that the analysis was holistic and inductive. The researchers then met for  
 6 axial coding and clustering to develop master headings and subsequently higher categories.  
 7 Fragmented codes were linked by using the techniques of constant comparison, continual checking  
 8 and clustering of emerging themes to formulate a theoretical model.<sup>19</sup> QDA Miner Lite software<sup>20</sup> was  
 9 used to assist with code frequency analysis, coding retrieval and Boolean text search.

10 **Patient and public involvement**

11 No patient or public were involved in the design, recruitment and conduct of the study.  
 12

13 **RESULTS**

## 14 Table 2. Demographic characteristics of participants (n=57)

| Demography Characteristics |            |
|----------------------------|------------|
| Age, years, mean (SD)      | 58 (10.8)  |
| Range                      | 40-82      |
| Gender, n (%)              |            |
| Male                       | 56 (98%)   |
| Female                     | 1 (2%)     |
| Ethnicity, n (%)           |            |
| Malay                      | 15 (29.4%) |
| Chinese                    | 32 (62.7%) |



|                                                         |            |
|---------------------------------------------------------|------------|
| Indian                                                  | 4 (7.8%)   |
| Education level, n (%)                                  |            |
| Primary education                                       | 21 (36.8%) |
| Lower secondary                                         | 19 (33.3%) |
| Upper secondary                                         | 14 (24.6%) |
| Tertiary                                                | 3 (5.3%)   |
| Fagestrom score, n (%)                                  |            |
| High addiction (8-10)                                   | 8 (14.0%)  |
| Moderate (5-7)                                          | 14 (24.6%) |
| Low to moderate addiction(3-4)                          | 20 (35.1%) |
| Low addiction(0-2)                                      | 15 (26.3%) |
| Marital status, n (%)                                   |            |
| Single                                                  | 10 (17.4%) |
| Married                                                 | 43 (75.4%) |
| Divorced                                                | 3 (0.05%)  |
| Widowed                                                 | 1 (0.02%)  |
| Previous attendance at smoking cessation clinics, n (%) |            |
| Yes                                                     | 19 (33.3%) |
| No                                                      | 38 (66.6%) |

We interviewed fifty-seven participants. Table 2 shows the participants' demographic characteristics in detail.

## Themes generated from grounded theory

### Theme 1: Personal and lifestyle factors

A majority of abstinent participants were unable to resist temptation cues when challenged. Their smoking relapses were attributed to the influence of friends who smoked in social activities or work places.

*"I felt it was because I mingled with friends who are all smokers. So, if I am the only person who has the plan to stop smoking and mix with friends who are still smoking, that is why... because the cigarette is exposed. I don't have any choice." (Participant 17)*

Participants conceded that relapses in smoking cessation were often related to impaired capacity for self-control and lack of intrinsic motivation.

*"Control... No power of control. Self-control is weak, rather weak." (Participant 13)*

Some participants related that the decision to resume smoking was rather impulsive.

*"Yes, it is a mistake. Because I was already not looking for (cigarette) that time, I already was not craving, but just "try, try". After then, it was like learning again, learning again the*

1  
2  
3 1 *taste slowly, it was like normal..... tried to discipline ah, err. After one week, it was very*  
4  
5 2 *hard, definitely very hard, (I) want to find a cigarette, then (I) must resist, resist the*  
6  
7 3 *temptation until 2 weeks then it went. By week 3, I feel that even the smells smoke from*  
8  
9 4 *other smokers make me not comfortable; not because I was craving for a cigarette, but it*  
10  
11 5 *was because it was like “stinky”. After then, gradually one month, two months, it is ok lah. It*  
12  
13 6 *is stable. By 3rd month and 4th month like that, definitely I was not looking (for a cigarette).*  
14  
15 7 *After then, I started to have the urge for a cigarette, so I want to try again, so it was my fault.*  
16  
17 8 *It was like “play... play” smoke, smoke again, not because of addiction oh.” (Participant 17)*

18 9 In addition, the withdrawal of extrinsic factors that motivated our participants to stop smoking was felt  
19  
20 10 to be the reason for the resumption of smoking. For example, recovering after sickness, release from  
21  
22 11 prison, no longer in a smoking free zone, no longer taking care of a sick relative or no longer being  
23  
24 12 nagged.

25  
26 13 *“I was admitted to ICU (intensive care unit) for 5 times in IJN (National Heart Institute). So I*  
27  
28 14 *smoked again after my bypass, I resumed smoking.” (Participant 28)*

## 30 31 Theme 2: Nicotine addiction

32  
33 16 Cigarettes contain highly addictive nicotine, and participants did report overpowering withdrawal  
34  
35 17 symptoms upon quitting.

36  
37 18 *“...Stopped 1-2 months, I felt more tired.....If I didn't smoke, I was not able to open my bowel, I*  
38  
39 19 *became constipated.....If I smoked at night, I slept better.”(Participant 26)*

40  
41  
42 20 *“I was feeling difficult, breathless at times. I also noticed that I had chest discomfort which was*  
43  
44 21 *more when I work. I had no choice but to smoke again.”(Participant 51)*

45  
46  
47 22 Psychological dependence was clearly highlighted by the pleasure they experienced from smoking.  
48  
49 23 Participants described experiences which were strongly suggestive of psychological addiction to  
50  
51 24 cigarette smoking, regardless if they realized it or not.

52  
53 25 *“That actual problem is our mind, the brain ...because why, you know? When we are not smoking,*  
54  
55 26 *the brain will tell you: ‘There are other smokers there, could you ask him for one cigarette?’*  
56  
57 27 *(Participant 37)*

1  
2  
3 1 “..... because for smoker, you feel that something is missing. So, you tend to ask for a stick. Ask  
4  
5 2 for a stick, you know. Then from then starts again. Two sticks..... ” (Participant 41)  
6

### 7 3 Theme 3: Socio-cultural Norms

8  
9 4 Some participants expressed that the offering of cigarettes from friends and relatives was the main  
10  
11 5 reason for their failure to quit. It was normal for smokers to offer their friends and relatives cigarettes  
12  
13 6 as a sign of goodwill and a close relationship.

14  
15 7 “My friends.... They offer and we don't refuse it. We take it as a token of friendship.” (Participant  
16  
17 8 43)  
18

19  
20 9 In some participants, despite having informed their peers that they had quit smoking, they were still  
21  
22 10 coerced into smoking. The peers gave them the impression that smoking a small amount of cigarettes  
23  
24 11 would not affect their ability to quit smoking.

25  
26 12 “I actually managed to quit – roughly 3 months. After that, I went for a course in Bangi for a week.  
27  
28 13 There, I had colleagues who smoke, they offered me. I said I didn't want (to smoke) because I've  
29  
30 14 quitted. And they said, “Never mind, only one.... So he gave me, and I smoked. After that, after  
31  
32 15 lunch, he offered me again.” (Participant 9)  
33

34  
35 16 For Muslim participants, the withdrawal of social and religious motivation after Ramadan (Fasting  
36  
37 17 month) also increased the tendency to relapse.

38  
39 18 “The month of “puasa” (the fasting month), I was free for the 1 month. Don't want lah, I don't  
40  
41 19 want to smoke in front of my family. Then, when it is during “iftar”, smoking will waste a lot of  
42  
43 20 time. So, I let myself relax for 1 month. I wanted to rest during fasting month. For my lungs to  
44  
45 21 cleanse it.....After the fasting month, I started back but less (cigarette). Sometimes 3-4  
46  
47 22 sticks, 5-6 sticks.” (Participant 23)  
48

### 49 50 23 Theme 4: Misconception

51  
52 24 Smoking cessation is a complex and dynamic process and most smokers make multiple attempts of  
53  
54 25 reduction, and abstinence.<sup>21</sup> Some participants perceived smoking cessation as just a game of the  
55  
56 26 mind.

57  
58 27 “..... to quit smoking depends on will power. For me, this is a game of the mind. We set our  
59  
60 28 mind, err, tomorrow, I don't want to smoke tomorrow, then I will not smoke tomorrow.”

1  
2  
3 1 (Participant 23)

4  
5 2 "I smoke for "saja" (just for fun), not because of addiction. But, if it is due to emotional  
6  
7 3 problems, up to here (point to his head); there are a lot of problems not solved, and the feeling  
8  
9 4 is up to here (point to head), this is another experience, then there will be just cigarette only.

10  
11 5 When the mind is not calm, err, finish one stick then another, again and again." (Participant 17)

12  
13 6 Patients usually trust their doctors and therefore take their doctors' recommendation seriously. Ideally,  
14  
15 7 this advice would include cessation tips, and the correction of false beliefs and misconceptions.

16  
17 8 "I stopped abruptly, so I felt breathless. Then my family brought me to the hospital ..... Then  
18  
19 9 the doctor scolded me, "Did you want to die? You cannot stop (smoking) completely all of a  
20  
21 10 sudden. If you want to stop, you need to come to the hospital and meet with the MO (medical  
22  
23 11 officer), the doctor, to get their advice. .... At least you have to smoke one a day."

24  
25 12 (Participant 9)

26  
27  
28 13 Some participants exaggerated or misinterpreted the effects of smoking cessation as harmful to  
29  
30 14 health.

31  
32 15 "I stopped for a few months then I became frightened. My friends said once stopped, disease will  
33  
34 16 come. Also, I saw my friend (who) died after stopping (smoking)." (Participant 11)

35  
36 17 "There are side effects when stop smoking, after I stopped smoking, I was diagnosed with high  
37  
38 18 blood pressure and had a heart attack as well." (Participant 28)

39  
40  
41 19 One participant who believed that second-hand smoke was more harmful than smoking itself.

42  
43 20 "If I breathe in second hand smoke, it is more poisonous than if I smoke myself." (Participant 1)

44  
45 21 It was interesting to also highlight the belief that smoking might in fact, be therapeutic.

46  
47 22 "I had that disease (Idiopathic thrombocytopenic purpura) for a long period, I did not know. .... I  
48  
49 23 suffered from bleeding gum when I brushed my teeth, sometimes it happened spontaneously. So  
50  
51 24 I resumed smoking. Once I started (smoking)... the gum bleed stopped. ....smoking is good."

52  
53 25 (Participant 33)

54  
55 26 One participant commented that hand-rolled tobacco leaves were less hazardous than commercial  
56  
57 27 cigarettes.

1  
2  
3 1 *“People said “rokok daun” (tobacco leaves) is better when compare to a cigarette. I cannot “tahan”*  
4  
5 2 *(stand) without smoking..., so, after discharged from the hospital, my friend recommended “rokok*  
6  
7 3 *daun”(tobacco leaves) to me. The smell is there...I tried it and I continue to smoke.....At least,*  
8  
9 4 *this “rokok daun” is better, and I managed to stop the cigarettes.” (Participant 49)*

10  
11 5 Interestingly, there were participants who developed defense mechanisms themselves to ward off the  
12  
13 6 concept that smoking is dangerous/unacceptable. This was particularly true when the participants felt  
14  
15 7 obliged to refrain from smoking in the presence of young children or other family members.

16  
17 8 *“Sometimes I smoke alone in my own room. But, I, err, I open the windows. My room has air-*  
18  
19 9 *conditioner but I don't even turn it on..... “I turn on the fan to blow away all the smoke.”*  
20  
21 10 *(Participant 6)*

## 22 23 24 11 Theme 5: Failed assisted smoking cessation

25  
26 12 Some participants tried conventional methods (smoking cessation clinics, nicotine replacement  
27  
28 13 therapy) as well as alternative methods such as electronic cigarettes in their attempts to quit smoking.  
29  
30 14 Most participants expressed that pharmacotherapy was ineffective. This perhaps resulted in a  
31  
32 15 negative impression towards the effectiveness of assisted smoking cessation. .

33  
34 16 *“Smoking cessation clinic does not work. I tried chewing the gum, no use. Not working at all.*  
35  
36 17 *Whatever medications they gave to stop smoking did not work.” (Participant 16)*

37  
38 18 *“I already bought the type of cigarettes, that “blocked”, I am not sure if you have heard that*  
39  
40 19 *before. The one with 3 cigarettes that is like when you smoke, it has no taste. May be you can*  
41  
42 20 *quit, but I cannot. I brought from the pharmacy.” (Participant 18)*

43  
44  
45 21 Non pharmacological factors also contributed to the dropout from smoking cessation clinics. These  
46  
47 22 included the accessibility of the clinic and the language spoken. Language barriers were highlighted  
48  
49 23 because of multiple languages spoken in Malaysia.

50  
51 24 *“I have been to smoking cessation clinic two times. It is just too troublesome to keep going there.”*  
52  
53 25 *(Participant 27)*

54  
55  
56 26 *“But I have gone there (stop smoking clinic). They were all Malay and my Malay is not very*  
57  
58 27 *(good).... I did not really understand.” (Participant 1)*

1  
2  
3 1 Some participants also noted that they did not know the methods available to quit smoking even  
4  
5 2 though they were willing to try them. Participants implied that their medical practitioners did not  
6  
7 3 convey nor educate them in the methods available to help them to quit smoking.  
8  
9

10 4 *“Doctors don't teach how to stop. And also nobody help you to stop. Do you think so? So, you don't*  
11 5 *know the way to stop.” (Participant 24)*  
12  
13  
14 6

## 7 **A descriptive model from grounded theory**

18  
19 8 Figure 1 presents a descriptive model showing the relationship amongst the five grounded theory  
20  
21 9 themes of participants' perceived reasons for failed quit smoking attempts. Notes accompanying the  
22  
23 10 diagram in figure 1 provided examples of each grounded theory theme.

24  
25 11 *Insert figure 1 here*

26  
27 12 The five themes are displayed as five concentric circles to show the relationship of the themes to one  
28  
29 13 another. Theme 1 (Lifestyle & Social Factors) describes the participants perceived the need to “avoid  
30  
31 14 presence of smokers, easy access to cigarettes, impaired self-control, and boredom” in order to avoid  
32  
33 15 nicotine addiction (theme 2). Theme 3 (Social & Cultural Norms) which includes “offering and  
34  
35 16 accepting cigarettes as token of friendship” have had great relapse consequences on abstinent  
36  
37 17 smokers. Theme 4 (Misconception) relates smokers' lived experiences on why they continue to  
38  
39 18 smoke. Some smokers perceive smoking as a “game of the mind” and they can quit anytime they  
40  
41 19 wish to do so; others continue to smoke because of the misconception that stopping smoking will be  
42  
43 20 harmful to health. Theme 5 (Failed Assisted Smoking Method) describes failures in the healthcare  
44  
45 21 delivery system as perceived by smokers. Participants interviewed in this study had negative  
46  
47 22 experiences of the smoking cessation services received, such as “limited accessibility”, “language  
48  
49 23 barrier” and “Do not know how the methods work”  
50

## 51 **Time frames for overcoming barriers to smoking cessation**

52  
53  
54 26 In this grounded theory study, we created a model of 5 themes of smoking abstinence barriers. Two  
55  
56 27 were potentially surmountable in the short term (less than 3 months) and three were potentially  
57  
58 28 surmountable in the long term (12 months or longer) time frames. (Figure 1)  
59  
60 29

## DISCUSSION

Smoking cessation is a challenging human process for both patients and doctor alike. Despite many decades of trying, we are struggling to make a significant improvement in cessation rates. A 2014 systematic review of qualitative and quantitative literature by Twyman et al<sup>22</sup> on six vulnerable groups (low socioeconomic; indigenous; mental illness; homeless; prisoners and at risk youths) described three common cessation barriers. These were: smoking for stress management, lack of social support from health and other service providers, and a high prevalence and acceptance of smoking in vulnerable communities.

Our study adds to what is known from Twyman et al's<sup>22</sup> review. New areas are covered namely; our participants were community based. Demographically, the mean age group (SD) was 58 (10.8); our participants comprises the 3 major races in Malaysia, with diverse cultural backgrounds. In addition, the uniqueness of the grounded theory method used in this study was that it produced the results on the lived experience of barriers to smoking cessation, which then formed the theory that explained the barriers to smoking cessation.

In Twyman et al's study, the duration of "short term" and "medium and long term" in the smoking cessation strategies was not defined. We have defined the time frames based on current literature namely, for short term as less than 3 months<sup>15, 16</sup>, and long term as 12 months or longer in smoking cessation strategies.<sup>17, 18</sup> The two studies agree on lifestyle and individual factors as short- term abstinence strategies, and similarly on cultural factors as long term abstinence strategies.

Misconception as a theme was not identified in Twyman et al's paper. We have classified this newly discovered theme as one that requires long term strategy because the patients who made the remarks were in the pre-contemplative stage of change namely, smoking cessation "as a game of the mind" and stopping smoking as harmful to health.

There are several conclusions to be taken from this study:

a) Theme 3: Offering cigarettes to one another is perceived as a sign of friendship and this cigarette culture serves as an impediment to smoking cessation in this society. In China, offering cigarettes is a sign of mutual respect during social events.<sup>23,24</sup> It is customary for a subordinate to light a cigarette for his seniors.<sup>24</sup> Smokers in our community will need to be taught methods of rejecting the offer of cigarettes and reassurance that declining an offer of a cigarette is not seen to be rude.

1  
2  
3 1 b)Theme 3: Smokers find it easier to stop smoking during Ramadan due to the religion, cultural and  
4  
5 2 environmental influences.<sup>25</sup> Although many Muslim smokers (97.7%<sup>26</sup>) in Malaysia smoke fewer  
6  
7 3 cigarettes during Ramadan, only 15 % perceive Ramadan as a strong motivator to quit smoking<sup>27</sup> and  
8  
9 4 therefore most relapse after Ramadan. It is also known that such smoking behaviour changes during  
10  
11 5 Ramadan is associated with those of higher incomes, high nicotine dependence and those who are  
12  
13 6 not aware that smoking is 'haram'(forbidden).<sup>25</sup> Ramadan should be seen as an excellent opportunity  
14  
15 7 for the implementation of a religious-competent intervention to improve cessation rates.

16  
17  
18 8 c)Theme 4: Our participants revealed a number of misconceptions which were considered to be  
19  
20 9 different from those listed in the literature.<sup>28</sup> For example, misinformation and misconceptions led  
21  
22 10 them to believe that reduction in tobacco consumption is acceptable, but if they were to quit smoking  
23  
24 11 entirely, it will cause disease. Second hand smoking is perceived to be more harmful than active  
25  
26 12 smoking, and therefore they believe that in a smoking environment, active smoking is encouraged. In  
27  
28 13 addition, false beliefs that smoking may be therapeutic or smoking with the fan on or hand-rolled  
29  
30 14 cigarettes are less hazardous is present in this community. Therefore, clinicians should first assess  
31  
32 15 and dispel the relevant false beliefs during counseling sessions.

33 16 d) Theme 1 and Theme 2 interactively: To healthcare practitioners, tobacco smoking is regarded as  
34  
35 17 an addiction. However, to patients, it is regarded as self-determined lifestyle choice.<sup>29</sup> Such  
36  
37 18 discrepancy was observed in this study. It has long been established that nicotine addiction is the  
38  
39 19 biggest cause of failure in smoking cessation. Nicotine can be as addictive as heroin, cocaine, or  
40  
41 20 alcohol<sup>30, 31</sup> and as a result, attempts to quit smoking are often unsuccessful because of withdrawal  
42  
43 21 symptoms including stress, and weight gain.<sup>32</sup> Nevertheless, our participants did not perceive  
44  
45 22 addiction as the major factor of failure, instead they expressed overwhelmingly that quitting smoking  
46  
47 23 is a "game of the mind." Smokers blamed themselves as having poor determination in that stop  
48  
49 24 smoking is a matter of how they control their mind. This finding is consistent with that of a recent  
50  
51 25 quantitative study<sup>33</sup> which showed that most smokers believe willpower is necessary or sufficient for  
52  
53 26 quitting. Such belief in mind control as the tool to quit smoking undermines the use of formal  
54  
55 27 cessation assistance. The failure to recognise symptoms of addiction of smoking renders smokers to  
56  
57 28 "not believe" in the usefulness of pharmacotherapy.<sup>34</sup> The use of smoking cessation strategies in our  
58  
59 29 setting has been low<sup>35</sup> and we believe such misconceptions contribute greatly to the failure of  
60  
30 smoking cessation. Participants were reluctant to receive professional help and preferred to "quit" by



1 themselves. A national survey in 2016 in Malaysia revealed that nearly 80% of former smokers quit  
2 without any professional intervention.<sup>35</sup> More work is needed to help smokers to accept that cigarette  
3 smoking is highly addictive and that nicotine addiction is very powerful. In addition, health care  
4 practitioners need to ensure sufficient patient knowledge to improve their confidence to acknowledge  
5 withdrawal symptoms and to focus more on the end result during the cessation process.

## 6 **Limitations**

7 The main limitation of this study is that only in-depth interviews and no focus group interviews were  
8 conducted. We did not organize any focus group interviews because the participants were too shy to  
9 speak in a group. While the opportunity to observe the interaction among the participants was lost, we  
10 managed to gain a more in-depth, detailed account of smokers' experience without them feeling  
11 inhibited to speak in a group.

12 Another possible limitation is selection bias. The highest education grade completed by the majority  
13 (70.1%) of the participants was either primary school or lower secondary education and this could  
14 have resulted a "less-educated-population". Nonetheless, we think the data obtained in our study is  
15 sufficiently robust to describe reasons contributing to failures in smoking cessation in this community.

## 17 **Implications and Recommendations**

18 We have provided suggestions for applications based on the grounded theory findings in the  
19 discussion above. We can use similar grounded theory design to explore theme 2 and theme 5 with  
20 the view of defining the extent of ignorance in the symptoms of nicotine addiction; misconceptions;  
21 and patient concerns on service provision deficiencies and lack of user-friendliness.

22 In addition, the themes of this model serve as a checklist for clinicians when exploring barriers to  
23 smoking cessation. In particular, in step 4 of both the 5A<sup>10</sup> (assist) techniques and 5R<sup>10</sup> (Roadblock)  
24 technique of brief intervention for smoking cessation so that appropriate action plan can be tailored  
25 accordingly. With all these efforts, hopefully, we could reach better smoking cessation rates.

## 27 **CONCLUSION**

28 Five themes of specific beliefs and practices prevented smokers from quitting. Clinicians need to work  
29 on these identified categories to help patients overcome barriers to smoking cessation guided by the  
30 time frames recommended by the authors. This study highlighted the importance of socio-cultural

1  
2  
3 1 environment and misconception as factors contributing to the failure to quit smoking in this community.  
4  
5 2 Educating smokers to dispel their misbeliefs is crucial. Development of religiously and culturally-  
6  
7 3 competent intervention should be considered to reduce relapse rate.  
8  
9  
10 4

## 11 5 **Acknowledgement**

12 6 We thank all the participants in this study. We are grateful for their involvement and effort.

13 7 We also thank Professor Paul Fogarty for his diligent copyediting of this article.  
14  
15 8

## 16 9 **Authors Contribution**

17 10 KYC conceived the idea. KYC and LGG contributed to the design of the study. KYC, KWL, CCT,  
18 11 XLC, KCT and STO conducted the individual focus interview, translated and transcribed  
19 12 independently. KYC, KWL, CCT, XLC, KYC, STO carried out thematic analysis as a group and  
20 13 drafted the original manuscript. KYC and LGG critically revised the manuscript. All authors provided  
21 14 approval of the final manuscript.

22 15 **Funding** The authors received no funding for this work.

23 16 **Competing interests** None declared.

24 17 **Ethics approval** This study registered and approved by Medical Research Ethics Committee of the  
25 18 Ministry of Health Malaysia (Ethics approval NMRR-16-2113-33134).

26 19 **Provenance and peer review** Not commissioned; externally peer reviewed.

27 20 **Data sharing statement** All requests should be directed to the corresponding author.  
28  
29 21

1  
2  
3  
4  
5  
6  
7  
8  
9  
10  
11  
12  
13  
14  
15  
16  
17  
18  
19  
20  
21  
22  
23  
24  
25  
26  
27  
28  
29  
30  
31  
32  
33  
34  
35  
36  
37  
38  
39  
40  
41  
42  
43  
44  
45  
46  
47  
48  
49  
50  
51  
52  
53  
54  
55  
56  
57  
58  
59  
60

1 **Figure legends**

2 Figure 1. A Grounded theory of barriers to smoking cessation

3

4

5

6

For peer review only

## 1 REFERENCES

1. Foll BL, Pushparaj A, Pryslawsky Y, et al. Translational strategies for therapeutic development in nicotine addiction: Rethinking the conventional bench to bedside approach. *Prog Neuropsychopharmacol Biol Psychiatry* 2014;52:86-93. doi: 10.1016/j.pnpbp.2013.10.009
2. World Health Organisation. Tobacco: World Health Organisation; [updated May 2017. Available from: <http://www.who.int/mediacentre/factsheets/fs339/en/> accessed January 20, 2018.
3. Borland R, Li L, Driezen P, et al. Cessation assistance reported by smokers in 15 countries participating in the International Tobacco Control (ITC) policy evaluation surveys. *Addiction* 2012;107(1):197-205. doi: 10.1111/j.1360-0443.2011.03636.x [published Online First: 2011/09/03]
4. Chaiton M, Diemert L, Cohen JE, et al. Estimating the number of quit attempts it takes to quit smoking successfully in a longitudinal cohort of smokers. *BMJ Open* 2016;6(6):e011045. doi: 10.1136/bmjopen-2016-011045 [published Online First: 2016/06/12]
5. Hughes JR, Keely J, Naud S. Shape of the relapse curve and long-term abstinence among untreated smokers. *Addiction* 2004;99(1):29-38. [published Online First: 2003/12/18]
6. Tobacco Use and Dependence Guideline Panel. Treating Tobacco Use and Dependence: 2008 Update. 6, Evidence and Recommendations. : Rockville (MD): US Department of Health and Human Services. Available from: <https://www.ncbi.nlm.nih.gov/books/NBK63943>.
7. Institute for Public Health (IPH) 2015. National Health and Morbidity Survey 2015 (NHMS 2015). Vol. II: Non-Communicable Diseases, Risk Factors & Other Health Problems;: Ministry of Health Malaysia, 2015.
8. Berkwits M, Inui TS. Making Use of Qualitative Research Techniques. *J Gen Intern Med* 1998;13(3):195-99. doi: 10.1046/j.1525-1497.1998.00054.x
9. Stewart M. Reflections on the doctor–patient relationship: from evidence and experience. *British Journal of General Practice* 2005;55(519):793-801.
10. Ministry of Health Maldives. National Tobacco Cessation Toolkit (5A & 5Rs) for all doctors and health professionals: Tobacco Prevention & Control Program, Health Promotion and Chronic Disease Control Division of Health Protection Agency, and Tobacco Cessation Clinic, Dhamanaveshi, Male', Ministry of Health, Maldives; 29th August 2016 [Available from: <http://www.searo.who.int/maldives/documents/tobacco-cessation-toolkit.pdf?ua=1> accessed 27 June 2018 2018.
11. Samik-Ibrahim RM. Grounded Theory Methodology as the Research Strategy for a Developing Country. *2000* 2000;1(1) doi: 10.17169/fqs-1.1.1129 [published Online First: 2000-01-31]
12. Strauss A, Corbin J. Chapter 7 : Grounded Theory Methodology: An Overview. In: Denzin NK, Lincoln YS, eds. Strategies of qualitative inquiry. Thousand Oaks, Calif: Sage Publications 1998:158-83.
13. Ritchie J, Lewis, J., & Elam, G. (2003). Designing and selecting samples. In J. Ritchie & J. Lewis (Eds.) Qualitative research practice : a guide for social science students and researchers: London: Sage 2003:pp. 77–108. .
14. Heatherton TF, Kozlowski LT, Frecker RC, et al. The Fagerstrom Test for Nicotine Dependence: A revision of the Fagerstrom Tolerance Questionnaire. *Br J Addict* 1991;86(9):1119-27. [published Online First: 1991/09/01]
15. Maskrey V, Blyth A, Brown TJ, et al. Self-help educational booklets for the prevention of smoking relapse following smoking cessation treatment: a randomized controlled trial. *Addiction (Abingdon, England)* 2015;110(12):2006-14. doi: 10.1111/add.13080 [published Online First: 2015/09/18]
16. Graham AL, Papandonatos GD, Cobb CO, et al. Internet and Telephone Treatment for smoking cessation: mediators and moderators of short-term abstinence. *Nicotine & tobacco research : official journal of the Society for Research on Nicotine and Tobacco* 2015;17(3):299-308. doi: 10.1093/ntr/ntu144 [published Online First: 2014/08/27]

- 1  
2  
3  
4  
5  
6  
7  
8  
9  
10  
11  
12  
13  
14  
15  
16  
17  
18  
19  
20  
21  
22  
23  
24  
25  
26  
27  
28  
29  
30  
31  
32  
33  
34  
35  
36  
37  
38  
39  
40  
41  
42  
43  
44  
45  
46  
47  
48  
49  
50  
51  
52  
53  
54  
55  
56  
57  
58  
59  
60
17. McClure JB, Bricker J, Mull K, et al. Comparative-Effectiveness of Group-Delivered Acceptance and Commitment Therapy vs. Cognitive Behavioral Therapy for Smoking Cessation: A Randomized Controlled Trial. *Nicotine & tobacco research : official journal of the Society for Research on Nicotine and Tobacco* 2018 doi: 10.1093/ntr/nty268 [published Online First: 2018/12/28]
  18. Nieva G, Comin M, Valero S, et al. Cigarette dependence and depressive symptoms as predictors of smoking status at five-year follow-up after a workplace smoking cessation program. *Addict Behav* 2017;73:9-15. doi: 10.1016/j.addbeh.2017.04.003 [published Online First: 2017/04/22]
  19. Glaser BG. Theoretical sensitivity: advances in the methodology of grounded theory. Mill Valley, Calif.: Sociology Press 1978.
  20. Nagle B. Qualitative Data Tool: Using QDA Miner Lite Association For Institutional Research. Data and Decisions for Higher Education; [Available from: <https://www.airweb.org/eAIR/techtips/Pages/QDA-Miner-Lite.aspx> accessed January 27 2018.
  21. Hughes JR, Solomon LJ, Naud S, et al. Natural History of Attempts to Stop Smoking. *Nicotine & Tobacco Research* 2014;16(9):1190-98. doi: 10.1093/ntr/ntu052
  22. Twyman L, Bonevski B, Paul C, et al. Perceived barriers to smoking cessation in selected vulnerable groups: a systematic review of the qualitative and quantitative literature. *BMJ Open* 2014;4(12) doi: 10.1136/bmjopen-2014-006414
  23. Wang J, Li C, Jia C, et al. Smoking, smoking cessation and tobacco control in rural China: a qualitative study in Shandong Province. *BMC Public Health* 2014;14:916. doi: 10.1186/1471-2458-14-916
  24. China Daily. China's cigarette culture 2014 [updated Updated: 2014-01-09 16:52. Available from: [http://www.chinadaily.com.cn/china/2014-01/09/content\\_17226897.htm](http://www.chinadaily.com.cn/china/2014-01/09/content_17226897.htm) accessed June 30 2018.
  25. Ismail S, Mohd Zulkefli NA, Chung CS, et al. Factors influencing smoking behaviour changes during Ramadan among Malay male students. *Journal of Fasting and Health* 2015;3(3):97-102. doi: 10.22038/jfh.2015.4738
  26. Abu Bakar AM JL, Nasir AM, Anselm ST, Chan WH, Rahman NA, Ibrahim N, Nirmala BP, Omar NM. Religious belief in relation to smoking: a cross-sectional study among Muslim males in the month of Ramadan. *Malaysian J Med Health Sci* 2002;2(2):32-35.
  27. Yong H-H, Hamann SL, Borland R, et al. Adult smokers' perception of the role of religion and religious leadership on smoking and association with quitting: A comparison between Thai Buddhists and Malaysian Muslims. *Social science & medicine (1982)* 2009;69(7):1025-31. doi: 10.1016/j.socscimed.2009.07.042
  28. Frieden TR, Blakeman DE. The Dirty Dozen: 12 Myths That Undermine Tobacco Control. *Am J Public Health* 2005;95(9):1500-05. doi: 10.2105/AJPH.2005.063073
  29. Breitling LP, Rothenbacher D, Stegmaier C, et al. Older Smokers' Motivation and Attempts to Quit Smoking: Epidemiological Insight into the Question of Lifestyle Versus Addiction. *Deutsches Ärzteblatt International* 2009;106(27):451-55. doi: 10.3238/arztebl.2009.0451
  30. Stolerman IP, Jarvis MJ. The scientific case that nicotine is addictive. *Psychopharmacology (Berl)* 1995;117(1):2-10; discussion 14-20. [published Online First: 1995/01/01]
  31. Henningfield JE, Cohen C, Slade JD. Is nicotine more addictive than cocaine? *Br J Addict* 1991;86(5):565-9. [published Online First: 1991/05/01]
  32. Cohen C, Pickworth WB, Henningfield JE. Cigarette smoking and addiction. *Clin Chest Med* 1991;12(4):701-10. [published Online First: 1991/12/01]
  33. Hughes JR, Naud S. Perceived role of motivation and self-efficacy in smoking cessation: A secondary data analysis. *Addict Behav* 2016;61:58-61. doi: <https://doi.org/10.1016/j.addbeh.2016.05.010>

1  
2  
3  
4  
5  
6  
7  
8  
9  
10  
11  
12  
13  
14  
15  
16  
17  
18  
19  
20  
21  
22  
23  
24  
25  
26  
27  
28  
29  
30  
31  
32  
33  
34  
35  
36  
37  
38  
39  
40  
41  
42  
43  
44  
45  
46  
47  
48  
49  
50  
51  
52  
53  
54  
55  
56  
57  
58  
59  
60

- 1 34. Morphett K, Partridge B, Gartner C, et al. Why Don't Smokers Want Help to Quit? A Qualitative  
2 Study of Smokers' Attitudes towards Assisted vs. Unassisted Quitting. *International Journal*  
3 *of Environmental Research and Public Health* 2015;12(6):6591-607. doi:  
4 10.3390/ijerph120606591  
5 35. Ministry of Health Malaysia Academy of Pharmacy Malaysia. CLINICAL PRACTICE GUIDELINES ON  
6 TREATMENT OF TOBACCO USE DISORDER Putrajaya, Malaysia: Tobacco Control Unit & FCTC  
7 Secretariat; 2017 [Available from:  
8 [http://www.moh.gov.my/penerbitan/CPG2017/Respiratory/CPG\\_TobacoDisorder.pdf](http://www.moh.gov.my/penerbitan/CPG2017/Respiratory/CPG_TobacoDisorder.pdf)  
9 accessed February 6 2018.

10

For peer review only

1  
2  
3  
4  
5  
6  
7  
8  
9  
10  
11  
12  
13  
14  
15  
16  
17  
18  
19  
20  
21  
22  
23  
24  
25  
26  
27  
28  
29  
30  
31  
32  
33  
34  
35  
36  
37  
38  
39  
40  
41  
42  
43  
44  
45  
46  
47  
48  
49  
50  
51  
52  
53  
54  
55  
56  
57  
58  
59  
60

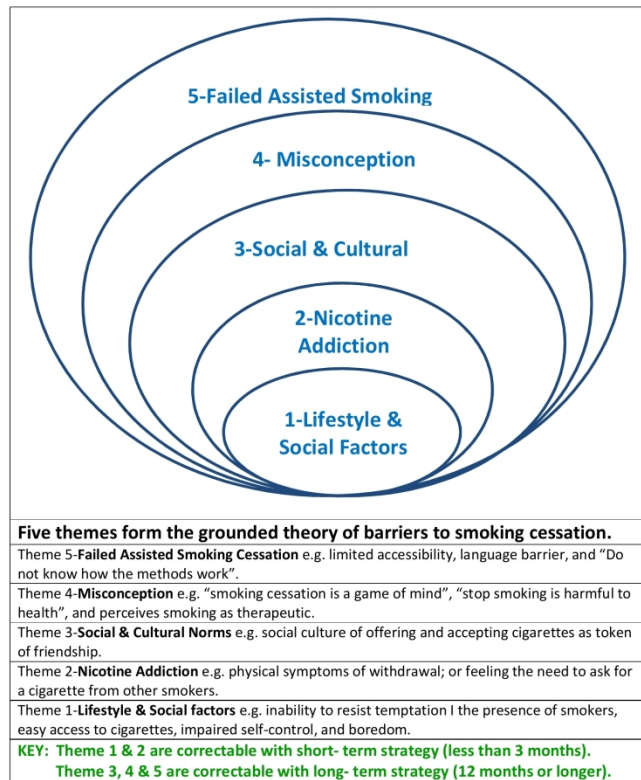

Figure 1. A Grounded theory of barriers to smoking cessation

215x279mm (300 x 300 DPI)

## COREQ (COnsolidated criteria for REporting Qualitative research) Checklist

A checklist of items that should be included in reports of qualitative research. You must report the page number in your manuscript where you consider each of the items listed in this checklist. If you have not included this information, either revise your manuscript accordingly before submitting or note N/A.

| Topic                                          | Item No. | Guide Questions/Description                                                                                                                              | Reported on Page No. |
|------------------------------------------------|----------|----------------------------------------------------------------------------------------------------------------------------------------------------------|----------------------|
| <b>Domain 1: Research team and reflexivity</b> |          |                                                                                                                                                          |                      |
| <i>Personal characteristics</i>                |          |                                                                                                                                                          |                      |
| Interviewer/facilitator                        | 1        | Which author/s conducted the interview or focus group?                                                                                                   |                      |
| Credentials                                    | 2        | What were the researcher's credentials? E.g. PhD, MD                                                                                                     |                      |
| Occupation                                     | 3        | What was their occupation at the time of the study?                                                                                                      |                      |
| Gender                                         | 4        | Was the researcher male or female?                                                                                                                       |                      |
| Experience and training                        | 5        | What experience or training did the researcher have?                                                                                                     |                      |
| <i>Relationship with participants</i>          |          |                                                                                                                                                          |                      |
| Relationship established                       | 6        | Was a relationship established prior to study commencement?                                                                                              |                      |
| Participant knowledge of the interviewer       | 7        | What did the participants know about the researcher? e.g. personal goals, reasons for doing the research                                                 |                      |
| Interviewer characteristics                    | 8        | What characteristics were reported about the interviewer/facilitator? e.g. Bias, assumptions, reasons and interests in the research topic                |                      |
| <b>Domain 2: Study design</b>                  |          |                                                                                                                                                          |                      |
| <i>Theoretical framework</i>                   |          |                                                                                                                                                          |                      |
| Methodological orientation and Theory          | 9        | What methodological orientation was stated to underpin the study? e.g. grounded theory, discourse analysis, ethnography, phenomenology, content analysis |                      |
| <i>Participant selection</i>                   |          |                                                                                                                                                          |                      |
| Sampling                                       | 10       | How were participants selected? e.g. purposive, convenience, consecutive, snowball                                                                       |                      |
| Method of approach                             | 11       | How were participants approached? e.g. face-to-face, telephone, mail, email                                                                              |                      |
| Sample size                                    | 12       | How many participants were in the study?                                                                                                                 |                      |
| Non-participation                              | 13       | How many people refused to participate or dropped out? Reasons?                                                                                          |                      |
| <i>Setting</i>                                 |          |                                                                                                                                                          |                      |
| Setting of data collection                     | 14       | Where was the data collected? e.g. home, clinic, workplace                                                                                               |                      |
| Presence of non-participants                   | 15       | Was anyone else present besides the participants and researchers?                                                                                        |                      |
| Description of sample                          | 16       | What are the important characteristics of the sample? e.g. demographic data, date                                                                        |                      |
| <i>Data collection</i>                         |          |                                                                                                                                                          |                      |
| Interview guide                                | 17       | Were questions, prompts, guides provided by the authors? Was it pilot tested?                                                                            |                      |
| Repeat interviews                              | 18       | Were repeat interviews carried out? If yes, how many?                                                                                                    |                      |
| Audio/visual recording                         | 19       | Did the research use audio or visual recording to collect the data?                                                                                      |                      |
| Field notes                                    | 20       | Were field notes made during and/or after the interview or focus group?                                                                                  |                      |
| Duration                                       | 21       | What was the duration of the interviews or focus group?                                                                                                  |                      |
| Data saturation                                | 22       | Was data saturation discussed?                                                                                                                           |                      |
| Transcripts returned                           | 23       | Were transcripts returned to participants for comment and/or                                                                                             |                      |



| Topic                                  | Item No. | Guide Questions/Description                                                                                                        | Reported on Page No. |
|----------------------------------------|----------|------------------------------------------------------------------------------------------------------------------------------------|----------------------|
|                                        |          | correction?                                                                                                                        |                      |
| <b>Domain 3: analysis and findings</b> |          |                                                                                                                                    |                      |
| <i>Data analysis</i>                   |          |                                                                                                                                    |                      |
| Number of data coders                  | 24       | How many data coders coded the data?                                                                                               |                      |
| Description of the coding tree         | 25       | Did authors provide a description of the coding tree?                                                                              |                      |
| Derivation of themes                   | 26       | Were themes identified in advance or derived from the data?                                                                        |                      |
| Software                               | 27       | What software, if applicable, was used to manage the data?                                                                         |                      |
| Participant checking                   | 28       | Did participants provide feedback on the findings?                                                                                 |                      |
| <i>Reporting</i>                       |          |                                                                                                                                    |                      |
| Quotations presented                   | 29       | Were participant quotations presented to illustrate the themes/findings?<br>Was each quotation identified? e.g. participant number |                      |
| Data and findings consistent           | 30       | Was there consistency between the data presented and the findings?                                                                 |                      |
| Clarity of major themes                | 31       | Were major themes clearly presented in the findings?                                                                               |                      |
| Clarity of minor themes                | 32       | Is there a description of diverse cases or discussion of minor themes?                                                             |                      |

Developed from: Tong A, Sainsbury P, Craig J. Consolidated criteria for reporting qualitative research (COREQ): a 32-item checklist for interviews and focus groups. *International Journal for Quality in Health Care*. 2007. Volume 19, Number 6: pp. 349 – 357

**Once you have completed this checklist, please save a copy and upload it as part of your submission. DO NOT include this checklist as part of the main manuscript document. It must be uploaded as a separate file.**
